# Supplementary material for: Divergent Synthesis of 5,7-Diazaullazines Derivatives through a Combination of Cycloisomerization with Povarov or Alkyne–Carbonyl Metathesis
Source: MDPI journal article supplement (doi:10.3390/molecules29092159), 2024-05-06
Supplement: s1 [file s1]

## Supplementary Materials

# Divergent Synthesis of 5,7-Diazaullazines Derivatives Through a Combination of Cycloisomerization with Povarov or Alkyne–Carbonyl Metathesis

Jonas Polkaehn <sup>1</sup>, Peter Ehlers <sup>1,\*</sup>, Alexander Villinger <sup>1</sup> and Peter Langer <sup>1,2,\*</sup>

<sup>1</sup> Institute of Chemistry, University Rostock, Albert-Einstein-Str. 3a, 18059 Rostock, Germany.

E-mail: peter.langer@uni-rostock.de; Fax: +49 381 498 6412; Tel: +49 381 498 6410

<sup>2</sup> Leibniz Institute for Catalysis (LIKAT) at the University Rostock, Albert-Einstein-Str. 29a, 18059 Rostock, Germany.

## Table of Contents

|                                                                                                                  |    |
|------------------------------------------------------------------------------------------------------------------|----|
| Analytical Data.....                                                                                             | 2  |
| X-Ray .....                                                                                                      | 5  |
| UV-vis-Data .....                                                                                                | 6  |
| Solvatochromism.....                                                                                             | 6  |
| DFT Calculations.....                                                                                            | 8  |
| Cartesian coordinates of the optimized ground-states (S <sub>0</sub> ) and excited-states (S <sub>1</sub> )..... | 8  |
| <sup>1</sup> H-, <sup>13</sup> C- and <sup>19</sup> F-NMR Spectra .....                                          | 19 |
| REFERENCES .....                                                                                                 | 46 |

## Analytical Data

### 4,6-dichloro-5-(1*H*-pyrrol-1-yl)pyrimidine (**2**)

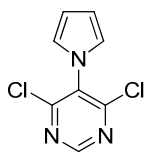

4,6-dichloropyrimidin-5-amine (**1**, 5.00 g, 30.49 mmol) was dissolved in 25 ml of acetic acid and 25 ml of 1,2-dichloroethane. Then 2,5-dimethoxy-tetrahydrofuran (1.05 eq.) was added. The solution was heated for 3 h under reflux. After cooling to room temperature, the reaction solution was extracted three times with dichloromethane. The combined organic phases were dried over  $\text{Na}_2\text{SO}_4$ , the solvent was distilled off in vacuo, and the residue was purified by column chromatography (heptane/EtOAc 5:1) to give **2** as a colorless solid in 95% yield (6.20 g, 28.97 mmol). The NMR data agree with previously published NMR data [1].  $^1\text{H}$  NMR (300 MHz,  $\text{CDCl}_3$ )  $\delta$  = 8.79 (s, 1H), 6.75 – 6.72 (m, 2H), 6.45 – 6.43 (m, 2H).  $^{13}\text{C}$  NMR (75 MHz,  $\text{CDCl}_3$ )  $\delta$  = 160.2, 156.3, 132.7, 121.5, 111.0.

### 1-(4,6-dichloropyrimidin-5-yl)-1*H*-pyrrole-2-carbaldehyde (**3**)

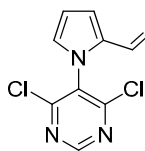

4,6-dichloro-5-(1*H*-pyrrol-1-yl)pyrimidine (**2**, 1.00 g, 4.67 mmol) was suspended in 5 ml DMF in a Schlenk flask under an argon atmosphere. 2 eq.  $\text{POCl}_3$  were added dropwise at  $0^\circ\text{C}$ . The solution was stirred at  $100^\circ\text{C}$  for 3 h, cooled to room temperature, neutralized with saturated  $\text{NaHCO}_3$ -solution and extracted with DCM. The combined organic phases were dried with  $\text{Na}_2\text{SO}_4$ , the solvent was removed in vacuo and the residue was purified by column chromatography to give **3** as a colorless solid in 41% yield (460 mg, 1.90 mmol). Mp.  $86\text{--}88^\circ\text{C}$ .  $^1\text{H}$  NMR (250 MHz,  $\text{CDCl}_3$ )  $\delta$  = 9.58 (d,  $J$  = 1.1 Hz, 1H), 8.83 (s, 1H), 7.19 (dd,  $J$  = 4.0 Hz,  $J$  = 1.5 Hz, 1H), 6.94 (ddd,  $J$  = 2.7 Hz,  $J$  = 1.5 Hz,  $J$  = 1.1 Hz, 1H), 6.58 (dd,  $J$  = 4.0 Hz,  $J$  = 2.8 Hz, 1H, CH).  $^{13}\text{C}$  NMR (63 MHz,  $\text{CDCl}_3$ )  $\delta$  = 178.6, 160.1, 156.8, 132.1, 131.9, 129.8, 124.4, 112.8. IR (ATR,  $\text{cm}^{-1}$ ):  $\tilde{\nu}$  = 1653 (s), 1517 (s), 1469 (s), 1416 (s), 1383 (s), 1362 (s), 1348 (s), 1084 (m), 1030 (m), 810 (s), 742 (vs). MS (EI, 70 eV):  $m/z$  (%) = 241 (6,  $\text{M}^+$ ), 240 (3), 209 (3), 208 (32), 207 (11), 206 (100), 124 (4), 93 (4), 93 (10), 65 (3), 39 (3). HRMS (ESI-TOF): calculated for  $\text{C}_9\text{H}_6\text{Cl}_2\text{N}_3\text{O}$  ( $[\text{M}+\text{H}]^+$ ) 241.9888, found 241.9892.

### General Procedure C for the synthesis of 1-(4,6-bis(arylethynyl)pyrimidin-5-yl)-1*H*-pyrrole-2-carbaldehyde (**4a-f**)

In a pressure tube, 250 mg (1.04 mmol) of 1-(4,6-dichloropyrimidin-5-yl)-1*H*-pyrrole-2-carbaldehyde (**3**), 0.06 eq.  $\text{PdCl}_2(\text{CH}_3\text{CN})_2$ , 0.04 eq. CuI, 0.12 eq. XPhos were dissolved in 1 ml  $\text{HN}^i\text{Pr}_2$  and 2 mL of 1,4-dioxane under argon counter current. Then, 3 eq. of the respective alkyne was added to the solution with stirring. The pressure tube was sealed with a Teflon cap and the solution was stirred for 24 h at  $90^\circ\text{C}$ . The reaction mixture was cooled to room temperature, quenched with distilled water and extracted three times with DCM. The combined organic phases were dried over  $\text{Na}_2\text{SO}_4$ , the solvent was distilled off in vacuo, and the residue was purified by column chromatography (heptane/EtOAc) to give the desired products (**4a-f**).

### 1-(4,6-bis(phenylethynyl)pyrimidin-5-yl)-1*H*-pyrrole-2-carbaldehyde (**4a**)

According to general procedure C, the title compound **4a** was obtained as a yellow-orange solid in 79% yield (306 mg, 0.82 mmol).  $R_f$  0.33 (heptane/EtOAc 2:1). Mp.  $121\text{--}124^\circ\text{C}$ .  $^1\text{H}$  NMR (300 MHz,  $\text{CDCl}_3$ )  $\delta$  = 9.62 (d,

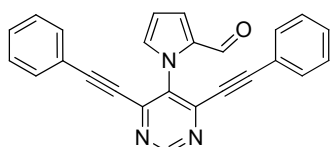

$J = 0.9$  Hz, 1H), 9.18 (s, 1H), 7.43 – 7.30 (m, 10H), 7.28 (dd,  $J = 4.0$  Hz,  $J = 1.6$  Hz, 1H), 7.18 (ddd,  $J = 2.6$  Hz,  $J = 1.6$  Hz,  $J = 1.0$  Hz, 1H), 6.64 (dd,  $J = 4.0$  Hz,  $J = 2.7$  Hz, 1H).  $^{13}\text{C}$  NMR (75 MHz,  $\text{CDCl}_3$ )  $\delta = 178.3, 157.9, 148.9, 136.9, 133.1, 132.5, 131.1, 130.4, 128.5, 123.3, 120.5, 111.7, 99.4, 83.3$ . IR (ATR,  $\text{cm}^{-1}$ ):  $\tilde{\nu} = 2211$  (m), 1659 (s), 1543 (s), 1469 (s), 1420 (s), 1401 (s), 1360 (m), 964 (m), 746 (vs), 684 (s), 530 (s). MS (EI, 70 eV):  $m/z$  (%) = 373 (8,  $\text{M}^+$ ), 372 (30), 346 (14), 345 (70), 344 (100), 343 (17), 342 (9), 318 (9), 317 (11), 316 (16), 315 (6), 172 (7), 158 (7). HRMS (ESI-TOF): calculated for  $\text{C}_{25}\text{H}_{16}\text{N}_3\text{O}$  ( $[\text{M}+\text{H}]^+$ ) 374.1293, found 374.1291.

#### 1-(4,6-bis(*p*-tolylethynyl)pyrimidin-5-yl)-1H-pyrrole-2-carbaldehyde (4b)

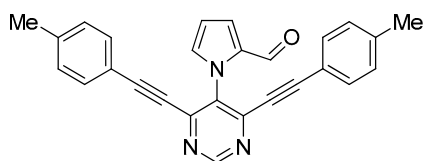

According to general procedure C, the title compound **4b** was obtained as a yellow-orange solid in 75% yield (312 mg, 0.78 mmol).  $R_f$  0.41 (heptane/EtOAc 2:1). Mp. 127-129°C.  $^1\text{H}$  NMR (250 MHz,  $\text{CDCl}_3$ )  $\delta = 9.62 - 9.59$  (m, 1H), 9.15 (s, 1H), 7.26 (dd,  $J = 3.5$  Hz,  $J = 2.0$  Hz, 1H), 7.22 (d,  $J = 8.1$  Hz, 4H), 7.18 – 7.16 (m, 1H), 7.12 (d,  $J = 8.2$  Hz, 4H), 6.62 (dd,  $J = 4.0$  Hz,  $J = 2.7$  Hz, 1H), 2.35 (s, 6H).  $^{13}\text{C}$  NMR (63 MHz,  $\text{CDCl}_3$ )  $\delta = 178.2, 157.9, 149.0, 141.0, 136.6, 133.1, 132.5, 131.1, 129.3, 123.1, 117.5, 111.6, 100.0, 83.1, 21.7$ . IR (ATR,  $\text{cm}^{-1}$ ):  $\tilde{\nu} = 2211$  (s), 1663 (s), 1541 (s), 1469 (s), 1422 (s), 1403 (s), 814 (s), 760 (vs), 742 (s), 530 (s). MS (EI, 70 eV):  $m/z$  (%) = 401 (8,  $\text{M}^+$ ), 400 (25), 374 (21), 373 (85), 372 (100), 371 (9), 357 (11), 356 (8), 178 (12), 164 (8). HRMS (ESI-TOF): calculated for  $\text{C}_{27}\text{H}_{20}\text{N}_3\text{O}$  ( $[\text{M}+\text{H}]^+$ ) 402.1606, found 402.1613.

#### 1-(4,6-bis((4-fluorophenyl)ethynyl)pyrimidin-5-yl)-1H-pyrrole-2-carbaldehyde (4c)

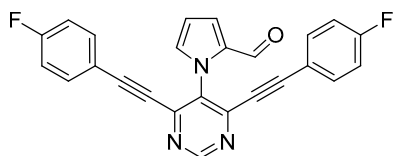

According to general procedure C, the title compound **4c** was obtained as a yellow-orange solid in 74% yield (315 mg, 0.77 mmol).  $R_f$  0.25 (heptane/EtOAc 3:1). Mp. 161-165°C.  $^1\text{H}$  NMR (300 MHz,  $\text{CDCl}_3$ )  $\delta = 9.61$  (d,  $J = 1.0$  Hz, 1H), 9.16 (s, 1H), 7.34 – 7.28 (m, 4H), 7.28 – 7.26 (m, 1H), 7.17 (ddd,  $J = 2.6$  Hz,  $J = 1.6$  Hz,  $J = 1.0$  Hz, 1H), 7.05 – 6.97 (m, 4H), 6.63 (dd,  $J = 3.9$  Hz,  $J = 2.7$  Hz, 1H).  $^{13}\text{C}$  NMR (75 MHz,  $\text{CDCl}_3$ )  $\delta = 178.2, 163.7$  (d,  $J = 253.5$  Hz), 157.9, 148.8, 136.7, 134.7 (d,  $^3J = 8.9$  Hz), 133.1, 131.0, 123.2, 116.6 (d,  $J = 3.5$  Hz), 116.0 (d,  $J = 22.4$  Hz), 111.7, 98.3, 83.1 (d,  $J = 1.6$  Hz).  $^{19}\text{F}$  NMR (282 MHz,  $\text{CDCl}_3$ )  $\delta = -106.6$ . IR (ATR,  $\text{cm}^{-1}$ ):  $\tilde{\nu} = 2209$  (s), 1663 (s), 1541 (s), 1529 (s), 1506 (vs), 1224 (s), 1216 (s), 1154 (s), 966 (s), 830 (vs), 762 (vs), 501 (vs). MS (EI, 70 eV):  $m/z$  (%) = 409 (7,  $\text{M}^+$ ), 408 (27), 382 (18), 381 (84), 380 (100), 379 (16), 378 (7), 354 (10), 353 (13), 352 (18), 176 (7), 157 (8), 144 (8). HRMS (ESI-TOF): calculated for  $\text{C}_{25}\text{H}_{14}\text{F}_2\text{N}_3\text{O}$  ( $[\text{M}+\text{H}]^+$ ) 410.1105, found 410.1103.

#### 1-(4,6-Bis((4-(dimethylamino)phenyl)ethynyl)pyrimidin-5-yl)-1H-pyrrole-2-carbaldehyde (4d)

According to general procedure C, the title compound **4d** was obtained as a yellow-orange solid in 77% yield (367 mg, 0.80 mmol).  $R_f$  0.41 (heptane/EtOAc 1:1). Mp. 137-140 °C.  $^1\text{H}$  NMR (300 MHz,  $\text{CDCl}_3$ )  $\delta = 9.58$  (d,  $J = 0.8$  Hz, 1H), 9.03 (s, 1H), 7.26 (dd,  $J = 4.0$  Hz,  $J = 1.6$  Hz, 1H), 7.20 – 7.14 (m, 5H), 6.60 (dd,  $J = 4.0$  Hz,

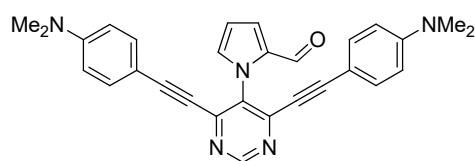

$J = 2.7$  Hz, 1H), 6.58 – 6.53 (m, 4H), 2.99 (s, 12H).  $^{13}\text{C}$  NMR (75 MHz,  $\text{CDCl}_3$ )  $\delta = 178.2, 157.8, 151.3, 149.1, 134.9, 134.1, 133.1, 131.1, 122.0, 111.4, 111.2, 106.7, 102.8, 83.2, 40.0$ . IR (ATR,  $\text{cm}^{-1}$ ):  $\tilde{\nu} = 2174$  (m), 1665 (s), 1601 (s), 1521 (vs), 1356

(vs), 1160 (s), 814 (vs), 758 (vs), 746 (vs), 519 (vs). MS (EI, 70 eV):  $m/z$  (%) = 459 (17,  $\text{M}^+$ ), 432 (14), 431 (37), 430 (32), 281 (39), 215 (21), 209 (13), 208 (19), 207 (100). HRMS (ESI-TOF): calculated for  $\text{C}_{29}\text{H}_{26}\text{N}_5\text{O}$  ( $[\text{M}+\text{H}]^+$ ) 460.2137, found 460.2145.

#### 1-(4,6-bis((4-methoxyphenyl)ethynyl)pyrimidin-5-yl)-1H-pyrrole-2-carbaldehyde (4e)

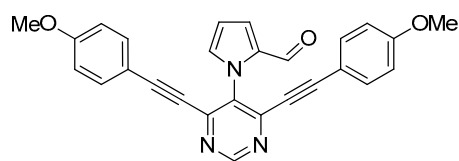

According to general procedure C, the title compound **4e** was obtained as a yellow-orange solid in 77% yield (347 mg, 0.80 mmol).  $R_f$  0.36 (heptane/EtOAc 1:1). Mp. 152-154 °C.  $^1\text{H}$  NMR (300 MHz,  $\text{CDCl}_3$ )  $\delta = 9.60$  (d,  $J = 0.9$  Hz, 1H), 9.11 (s, 1H), 7.31 – 7.20 (m, 5H),

7.16 (ddd,  $J = 2.6$  Hz,  $J = 1.6$  Hz,  $J = 0.9$  Hz, 1H), 6.85 – 6.80 (m, 4H), 6.62 (dd,  $J = 3.9$  Hz,  $J = 2.7$  Hz, 1H), 3.80 (s, 6H).  $^{13}\text{C}$  NMR (75 MHz,  $\text{CDCl}_3$ )  $\delta = 178.2, 161.3, 157.8, 149.0, 136.1, 134.3, 133.1, 131.1, 122.8, 114.2, 112.5, 111.5, 100.3, 82.9, 55.3$ . IR (ATR,  $\text{cm}^{-1}$ ):  $\tilde{\nu} = 2201$  (s), 1661 (s), 1541 (s), 1506 (s), 1465 (s), 1253 (vs), 1170 (s), 1160 (s), 1028 (s), 826 (vs), 760 (vs), 746 (vs), 538 (vs). MS (EI, 70 eV):  $m/z$  (%) = 433 (5,  $\text{M}^+$ ), 432 (16), 406 (27), 405 (100), 404 (62), 390 (8), 389 (7), 362 (5), 361 (6), 319 (5), 318 (5), 159 (6). HRMS (ESI-TOF): calculated for  $\text{C}_{27}\text{H}_{20}\text{N}_3\text{O}_3$  ( $[\text{M}+\text{H}]^+$ ) 434.1505, found 434.1509.

#### 1-(4,6-bis((4-(trifluoromethyl)phenyl)ethynyl)pyrimidin-5-yl)-1H-pyrrole-2-carbaldehyde (4f)

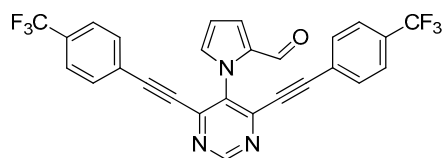

According to general procedure C, the title compound **4f** was obtained as a yellow-orange solid in 63% yield (336 mg, 0.66 mmol).  $R_f$  0.41 (heptane/EtOAc 3:1). Mp. 140-143 °C.  $^1\text{H}$  NMR (300 MHz,  $\text{CDCl}_3$ )  $\delta = 9.63$  (d,  $J = 1.0$  Hz, 1H), 9.23 (s, 1H), 7.61 – 7.56 (m, 4H), 7.46 –

7.41 (m, 4H), 7.28 (dd,  $J = 4.0$  Hz,  $J = 1.6$  Hz, 1H), 7.19 (ddd,  $J = 2.6$  Hz,  $^4J = 1.6$  Hz,  $J = 1.0$  Hz, 1H), 6.66 (dd,  $J = 4.0$  Hz,  $J = 2.7$  Hz, 1H).  $^{13}\text{C}$  NMR (75 MHz,  $\text{CDCl}_3$ )  $\delta = 178.3, 158.0, 148.6, 137.5, 133.1, 132.7, 132.0$  (q,  $J = 32.9$  Hz, C), 131.0, 125.5 (q,  $J = 3.8$  Hz), 124.2 (q,  $J = 1.7$  Hz), 123.6, 123.5 (q,  $J = 272.6$  Hz), 111.9, 97.2, 84.8.  $^{19}\text{F}$  NMR (282 MHz,  $\text{CDCl}_3$ )  $\delta = -63.18$ . IR (ATR,  $\text{cm}^{-1}$ ):  $\tilde{\nu} = 2219$  (m), 1665 (s), 1539 (m), 1319 (vs), 1164 (s), 1121 (vs), 1105 (s), 1063 (vs), 1016 (s), 839 (s), 758 (s), 744 (m), 723 (m). MS (EI, 70 eV):  $m/z$  (%) = 509 (13,  $\text{M}^+$ ), 508 (37), 482 (25), 481 (100), 480 (98), 479 (6), 454 (8), 412 (6), 411 (8). HRMS (ESI-TOF): calculated for  $\text{C}_{27}\text{H}_{14}\text{F}_6\text{N}_3\text{O}$  ( $[\text{M}+\text{H}]^+$ ) 510.1041, found 510.1049.

## X-Ray

Table S1: 5,13-bis(4-fluorophenyl)pyrimido[4',5',6':9,1]pyrrolo[2',1':4,5,6]quinolizino[3,2-b]quinoline (**5d**)

|                                   |                                                                                     |
|-----------------------------------|-------------------------------------------------------------------------------------|
| Chem. Formula                     | C <sub>31</sub> H <sub>16</sub> N <sub>4</sub> F <sub>2</sub> + 2 CHCl <sub>3</sub> |
| Form. Wght [g mol <sup>-1</sup> ] | 721.21                                                                              |
| color                             | orange                                                                              |
| Cryst. system                     | triclinic                                                                           |
| Space group (Hall group)          | P -1 (-P 1)                                                                         |
| <i>a</i> [Å]                      | 10.2831(8)                                                                          |
| <i>b</i> [Å]                      | 12.1814(10)                                                                         |
| <i>c</i> [Å]                      | 12.2969(11)                                                                         |
| $\alpha$ [°]                      | 88.868(3)                                                                           |
| $\beta$ [°]                       | 78.979(3)                                                                           |
| $\gamma$ [°]                      | 86.263(3)                                                                           |
| <i>V</i> [Å <sup>3</sup> ]        | 1508.7(2)                                                                           |
| <i>Z</i>                          | 2                                                                                   |
| <i>N</i> <sub>ref</sub>           | 10029                                                                               |
| $\theta_{\max}$ [°]               | 31.499                                                                              |
| <i>h, k, l</i> <sub>max</sub>     | 15, 17, 18                                                                          |
| $\rho_x$ [g cm <sup>-3</sup> ]    | 1.588                                                                               |
| $\mu$ [mm <sup>-1</sup> ]         | 0.615                                                                               |
| $\lambda_{\text{MoK}\alpha}$ [Å]  | 0.71073                                                                             |
| <i>T</i> [K]                      | 123                                                                                 |
| <i>F</i> (000)                    | 728.0                                                                               |
| <i>N</i> <sub>par</sub>           | 438                                                                                 |
| <i>R</i>                          | 0.0357( 8508)                                                                       |
| <i>wR</i> <sub>2</sub>            | 0.1020( 10029)                                                                      |
| <i>S</i>                          | 1.047                                                                               |

## UV-vis-Data

Table S2: detailed Spectroscopic Data of **5a**, **5k**, **5l** and **6a** in DCM ( $c = 10^{-5}$  M) at 20 °C

|                        | <b>5a</b>         | <b>5k</b>         | <b>5l</b>         | <b>6a</b>         |
|------------------------|-------------------|-------------------|-------------------|-------------------|
| $\lambda_{1,abs}$ [nm] | 497               | 516               | 503               | 420               |
| $\epsilon_{\lambda 1}$ | 0.8               | 0.3               | 0.7               | 2.0               |
| $\lambda_{2,abs}$ [nm] | 479               | 378 <sup>b</sup>  | 475               | 399 <sup>b</sup>  |
| $\epsilon_{\lambda 2}$ | 0.8               | 1.0               | 0.7               | 1.2               |
| $\lambda_{3,abs}$ [nm] | 395 <sup>b</sup>  | 347               | 402 <sup>b</sup>  |                   |
| $\epsilon_{\lambda 3}$ | 0.7               | 2.2               | 0.4               |                   |
| $\lambda_{4,abs}$ [nm] | 370 <sup>b</sup>  |                   | 378 <sup>b</sup>  |                   |
| $\epsilon_{\lambda 4}$ | 1.4               |                   | 1.4               |                   |
| $\lambda_{5,abs}$ [nm] | 339               |                   | 348               |                   |
| $\epsilon_{\lambda 5}$ | 4.8               |                   | 5.4               |                   |
| $\lambda_{1,em}$ [nm]  | 530               | 548 <sup>b</sup>  | 542               | 462               |
| $\lambda_{2,em}$ [nm]  |                   | 585               |                   |                   |
| $E_g^{opt,c}$ [eV]     | 2.47              | 2.42              | 2.43              | 2.85              |
| $\Phi$                 | 0.52 <sup>d</sup> | 0.29 <sup>d</sup> | 0.53 <sup>d</sup> | 0.10 <sup>e</sup> |

<sup>a</sup>  $10^4$  L · mol<sup>-1</sup>cm<sup>-1</sup>; <sup>b</sup> indicated as shoulder; <sup>c</sup> determined from the intersection of the normalized absorption and emission spectra; <sup>d</sup> Fluorescence standard: rhodamine 6G in EtOH ( $\Phi = 0.94$ ) [2].; <sup>e</sup> Fluorescence standard: coumarin 153 in EtOH ( $\Phi = 0.38$ ) [2].

## Solvatochromism

Although there is hardly any difference in the absorption spectra for the two compounds in the different solvents, **5a** nevertheless displays a decrease in the fine structure with an increased polarity. In the emission, stronger influences are perceptible. In addition, both compounds possess a different behavior, **5a** displays a change in structure, while in toluene and DCM an emission peak with a shoulder can be seen, in acetonitrile and ethanol this shoulder disappears. Furthermore, a slight redshift is apparent. **5k**, on the other hand, exhibits a stronger broadening of the emission with higher polarity. Interestingly, the maximum of the emission is red shifted from toluene to DCM, but blue shifted in acetonitrile and even more in ethanol. In addition, we determined the quantum yields in the different solvents. For **5a**, there is hardly any change in the quantum yields (52%-56%). For **5c**, however, the quantum yield decreases with increasing polarity of the solvent. In toluene the yield is 32%, in DCM at 29% while in acetonitrile and ethanol it is only 20%. The data are specified in Table S3.

Furthermore, we calculated the dipole moments of the transition state. Both compounds show only a slight increase. However, **5k** ( $s_0 = 5.29$  D;  $s_1 = 6.06$  D) already has a higher dipole moment in the ground state than **5a** ( $s_0 = 1.54$  D;  $s_1 = 2.00$  D). All in all, both molecules exhibit only a very weak ICT character, which is somewhat reinforced by the NMe<sub>2</sub>-group in **5k**.

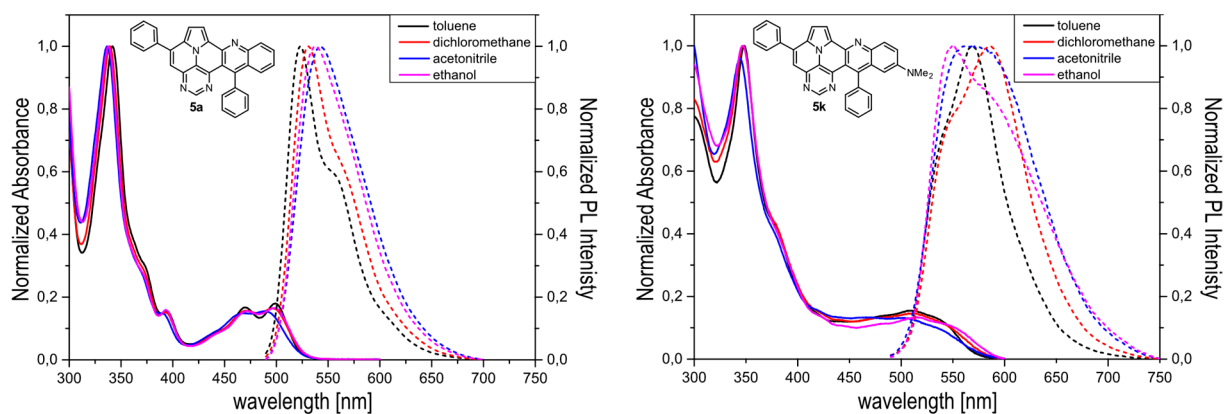

Figure S1: solvatochromism studies of **5a** and **5k**

Table S3: Quantum yields and  $\lambda_{\max,em}$  of solvatochromism measurements for **5a** and **5k**

|           | toluene  |                          | DCM      |                          | Acetonitrile |                          | Ethanol  |                          |
|-----------|----------|--------------------------|----------|--------------------------|--------------|--------------------------|----------|--------------------------|
|           | $\Phi^a$ | $\lambda_{\max,em}$ [nm] | $\Phi^a$ | $\lambda_{\max,em}$ [nm] | $\Phi^a$     | $\lambda_{\max,em}$ [nm] | $\Phi^a$ | $\lambda_{\max,em}$ [nm] |
| <b>5a</b> | 0.56     | 523                      | 0.52     | 530                      | 0.54         | 542                      | 0.54     | 537                      |
| <b>5k</b> | 0.32     | 568                      | 0.29     | 585                      | 0.20         | 568                      | 0.20     | 551                      |

<sup>a</sup>: Fluorescence standard: rhodamine 6G in EtOH ( $\Phi = 0.94$ ) [2].

## DFT Calculations

Density functional theory (DFT) and time-dependent density functional theory (TD-DFT) calculations were performed with Gaussian09 [3]. The ground and excited state structures were optimized using the B3LYP, functional and the 6-31G(d,p) basis set. The solvent effects have been considered by using the integral equation formalism variant (IEFPCM) model. NICS2BC were calculated with the B3LYP functional coupled with Grimme's D3 empirical dispersion correction and 6-311G(d,p) basis set. Nucleus independent chemical shifts (NICS) were calculated using the gauge including atomic orbitals (GIAO) method at the same level of theory. The bond current maps were generated using the BC-Wizard [4].

Cartesian coordinates of the optimized ground-states ( $S_0$ ) and excited-states ( $S_1$ )

Table S4: **S<sub>0</sub>**: 5,13-diphenylpyrimido[4',5':6''9,1]pyrrolo[2',1':5''4,5,6]quinolizino[3,2-b]quinoline (**5a**)

E = -1411.23 Hartree

| Symbol | X         | Y         | Z         |
|--------|-----------|-----------|-----------|
| C      | -0.059922 | -3.234937 | -0.035355 |
| N      | -0.965593 | -2.247304 | -0.037085 |
| C      | -0.505065 | -0.983914 | -0.025585 |
| C      | 0.888569  | -0.787045 | -0.018922 |
| C      | 1.772528  | -1.886134 | -0.023464 |
| N      | 1.269907  | -3.143559 | -0.027696 |
| H      | -0.467822 | -4.244025 | -0.042406 |
| N      | 1.417293  | 0.473829  | -0.018065 |
| C      | 0.669648  | 1.627403  | -0.060577 |
| C      | 2.780482  | 0.761862  | -0.022667 |
| C      | 1.576269  | 2.692654  | -0.099220 |
| C      | 2.876209  | 2.162599  | -0.080393 |
| H      | 1.300187  | 3.735523  | -0.140507 |
| H      | 3.797665  | 2.723571  | -0.113521 |
| C      | 3.181031  | -1.630382 | -0.011412 |
| H      | 3.845739  | -2.485829 | 0.021322  |
| C      | 3.690027  | -0.346206 | -0.003881 |
| C      | -1.388420 | 0.196649  | -0.030008 |
| C      | -0.768070 | 1.511729  | -0.063018 |
| C      | -2.789834 | 0.141084  | -0.010993 |
| C      | -3.523784 | 1.364074  | -0.041444 |
| C      | -2.797733 | 2.601269  | -0.087235 |
| N      | -1.447639 | 2.653203  | -0.092912 |



|   |           |           |           |
|---|-----------|-----------|-----------|
| C | -3.576425 | -1.131983 | 0.054926  |
| C | -3.916436 | -1.685164 | 1.296317  |
| C | -4.058222 | -1.732003 | -1.115653 |
| C | -4.700439 | -2.837254 | 1.363778  |
| H | -3.559857 | -1.216158 | 2.208595  |
| C | -4.841520 | -2.884588 | -1.046211 |
| H | -3.811449 | -1.299977 | -2.080969 |
| C | -5.162008 | -3.442781 | 0.193084  |
| H | -4.952823 | -3.259603 | 2.332064  |
| H | -5.203506 | -3.344253 | -1.961260 |
| H | -5.772692 | -4.339147 | 0.246422  |
| C | -4.948960 | 1.416136  | -0.025885 |
| C | -5.611145 | 2.620554  | -0.060074 |
| H | -6.696348 | 2.641213  | -0.048660 |
| C | -4.887372 | 3.840450  | -0.109603 |
| H | -5.426081 | 4.782810  | -0.136243 |
| C | -3.513933 | 3.831456  | -0.122131 |
| H | -2.935543 | 4.748704  | -0.157267 |
| H | -5.509027 | 0.489758  | 0.012072  |
| C | 5.155752  | -0.110746 | 0.019066  |
| C | 6.006638  | -0.877918 | -0.794691 |
| C | 5.724648  | 0.854861  | 0.867324  |
| C | 7.386661  | -0.683293 | -0.762975 |
| H | 5.579530  | -1.614087 | -1.468512 |
| C | 7.105771  | 1.044667  | 0.900233  |
| H | 5.085210  | 1.438572  | 1.521040  |
| C | 7.940990  | 0.278685  | 0.084316  |
| H | 8.028191  | -1.279240 | -1.405076 |
| H | 7.529401  | 1.787956  | 1.568876  |
| H | 9.015853  | 0.430338  | 0.108454  |

Table S5: **S<sub>6</sub>**: *N,N*-dimethyl-5,13-diphenylpyrimido[4',5':6:9,1]pyrrolo[2',1':5:4,5,6]quinolizino[3,2-b]quinolin-11-amine (**5k**)

E = -1545.21 Hartree

| Symbol | X         | Y        | Z        |
|--------|-----------|----------|----------|
| C      | -1.036960 | 3.385873 | 0.039147 |
| N      | -0.028573 | 2.504594 | 0.031724 |

---

|   |           |           |           |
|---|-----------|-----------|-----------|
| C | -0.346929 | 1.196629  | 0.017231  |
| C | -1.710647 | 0.848344  | 0.012565  |
| C | -2.710428 | 1.844030  | 0.012884  |
| N | -2.349242 | 3.149348  | 0.029729  |
| H | -0.742452 | 4.433803  | 0.053330  |
| N | -2.098696 | -0.463204 | -0.002046 |
| C | -1.228578 | -1.526126 | -0.044022 |
| C | -3.424451 | -0.899013 | -0.020900 |
| C | -2.012700 | -2.684282 | -0.097086 |
| C | -3.364003 | -2.300541 | -0.087989 |
| H | -1.623723 | -3.690416 | -0.141828 |
| H | -4.217298 | -2.959933 | -0.133974 |
| C | -4.082296 | 1.435750  | 0.007235  |
| H | -4.837114 | 2.212814  | 0.041442  |
| C | -4.447772 | 0.102804  | -0.002538 |
| C | 0.662413  | 0.122274  | 0.000811  |
| C | 0.187714  | -1.250371 | -0.035709 |
| C | 2.049375  | 0.335104  | 0.011904  |
| C | 2.921698  | -0.797882 | -0.011646 |
| C | 2.325142  | -2.102758 | -0.052257 |
| N | 0.993760  | -2.308188 | -0.063606 |
| C | 2.688076  | 1.689355  | 0.047790  |
| C | 3.013784  | 2.288943  | 1.271579  |
| C | 3.055593  | 2.330427  | -1.142792 |
| C | 3.665775  | 3.522260  | 1.303447  |
| H | 2.746922  | 1.791460  | 2.199424  |
| C | 3.706864  | 3.564077  | -1.110112 |
| H | 2.821379  | 1.865026  | -2.095767 |
| C | 4.010660  | 4.165909  | 0.112974  |
| H | 3.905530  | 3.979237  | 2.259280  |
| H | 3.978571  | 4.053661  | -2.040913 |
| H | 4.517880  | 5.125872  | 0.138338  |
| C | 4.334684  | -0.681647 | 0.000782  |
| C | 5.166906  | -1.804155 | -0.020503 |
| C | 4.546420  | -3.101064 | -0.069503 |
| H | 5.161002  | -3.992136 | -0.095965 |
| C | 3.185387  | -3.236735 | -0.082887 |

---

|   |           |           |           |
|---|-----------|-----------|-----------|
| H | 2.724573  | -4.218578 | -0.118240 |
| H | 4.760898  | 0.309893  | 0.027187  |
| C | -5.879566 | -0.291025 | 0.002357  |
| C | -6.800409 | 0.381646  | -0.818719 |
| C | -6.349277 | -1.317162 | 0.840131  |
| C | -8.150977 | 0.036152  | -0.804824 |
| H | -6.449226 | 1.164097  | -1.484222 |
| C | -7.701372 | -1.658171 | 0.855384  |
| H | -5.657258 | -1.830164 | 1.499566  |
| C | -8.606336 | -0.985170 | 0.031969  |
| H | -8.846430 | 0.561257  | -1.452662 |
| H | -8.048216 | -2.446912 | 1.516224  |
| H | -9.658173 | -1.254410 | 0.042166  |
| N | 6.539437  | -1.694202 | 0.008388  |
| C | 7.151242  | -0.374478 | -0.005354 |
| H | 8.234730  | -0.479586 | 0.040066  |
| H | 6.897575  | 0.189176  | -0.914168 |
| H | 6.832261  | 0.220700  | 0.859114  |
| C | 7.385617  | -2.873122 | -0.122639 |
| H | 7.236369  | -3.391016 | -1.079697 |
| H | 8.429384  | -2.565964 | -0.066528 |
| H | 7.208113  | -3.591559 | 0.686245  |

Table S6: **S<sub>0</sub>**: 5,13-diphenyl-11-(trifluoromethyl)pyrimido[4',5',6':9,1]pyrrolo[2',1',5':4,5,6]quinolizino[3,2-b]quinoline (**5l**)

E = -1748.27 Hartree

| Symbol | X         | Y         | Z         |
|--------|-----------|-----------|-----------|
| C      | -1.316856 | 3.420121  | 0.019843  |
| N      | -0.289011 | 2.559949  | 0.013280  |
| C      | -0.580028 | 1.247730  | 0.005826  |
| C      | -1.934769 | 0.868203  | 0.004661  |
| C      | -2.955901 | 1.841288  | 0.004123  |
| N      | -2.622959 | 3.153426  | 0.015494  |
| H      | -1.045212 | 4.473867  | 0.028333  |
| N      | -2.291914 | -0.451188 | -0.006504 |
| C      | -1.397712 | -1.496488 | -0.050181 |
| C      | -3.603650 | -0.916491 | -0.021423 |

---

|   |           |           |           |
|---|-----------|-----------|-----------|
| C | -2.156113 | -2.672105 | -0.100331 |
| C | -3.513683 | -2.317853 | -0.087566 |
| H | -1.745202 | -3.669435 | -0.145412 |
| H | -4.353014 | -2.994879 | -0.130641 |
| C | -4.318296 | 1.401443  | 0.003541  |
| H | -5.090798 | 2.160895  | 0.037166  |
| C | -4.652625 | 0.061257  | -0.001744 |
| C | 0.451440  | 0.193292  | -0.008623 |
| C | 0.010107  | -1.192451 | -0.045786 |
| C | 1.832068  | 0.434777  | 0.004167  |
| C | 2.718626  | -0.683077 | -0.024843 |
| C | 2.164046  | -2.004011 | -0.067898 |
| N | 0.835528  | -2.235377 | -0.076382 |
| C | 2.446333  | 1.799605  | 0.050568  |
| C | 2.740144  | 2.400516  | 1.281412  |
| C | 2.816581  | 2.448077  | -1.134701 |
| C | 3.369175  | 3.645138  | 1.324172  |
| H | 2.469023  | 1.896249  | 2.204141  |
| C | 3.444187  | 3.693388  | -1.089048 |
| H | 2.605112  | 1.980640  | -2.091810 |
| C | 3.719067  | 4.296988  | 0.139777  |
| H | 3.588005  | 4.103641  | 2.284030  |
| H | 3.721271  | 4.189533  | -2.014502 |
| H | 4.209023  | 5.265403  | 0.174440  |
| C | 4.135363  | -0.541010 | -0.011600 |
| C | 4.949510  | -1.647599 | -0.042831 |
| C | 4.398646  | -2.958569 | -0.088523 |
| H | 5.059632  | -3.818733 | -0.113538 |
| C | 3.039702  | -3.128820 | -0.100391 |
| H | 2.591470  | -4.115728 | -0.133832 |
| H | 4.569342  | 0.449162  | 0.022759  |
| C | -6.073733 | -0.368124 | 0.008111  |
| C | -7.011896 | 0.276602  | -0.815678 |
| C | -6.515646 | -1.400293 | 0.853548  |
| C | -8.353290 | -0.102458 | -0.796939 |
| H | -6.681662 | 1.062884  | -1.487344 |
| C | -7.858875 | -1.774181 | 0.873810  |

---

|   |           |           |           |
|---|-----------|-----------|-----------|
| H | -5.810458 | -1.891660 | 1.515572  |
| C | -8.781462 | -1.129126 | 0.047590  |
| H | -9.062694 | 0.400744  | -1.446917 |
| H | -8.184984 | -2.566693 | 1.540560  |
| H | -9.826232 | -1.424277 | 0.061570  |
| C | 6.444599  | -1.506842 | -0.026364 |
| F | 7.009477  | -2.086111 | -1.114427 |
| F | 6.849852  | -0.220255 | -0.002999 |
| F | 6.989063  | -2.118395 | 1.054552  |

Table S7: **S<sub>0</sub>**: phenyl(8-phenylpyrimido[4,5,6-ij]pyrrolo[2,1,5-de]quinolizin-4-yl)methanone (**6a**)

E = -1201.23 Hartree

| Symbol | X         | Y         | Z         |
|--------|-----------|-----------|-----------|
| C      | 0.385146  | 3.444816  | 0.640676  |
| N      | -0.926172 | 3.186838  | 0.688766  |
| C      | -1.290390 | 1.922348  | 0.367277  |
| C      | -0.293231 | 0.989557  | 0.012396  |
| C      | 1.066299  | 1.367941  | -0.037175 |
| N      | 1.395333  | 2.634407  | 0.302128  |
| H      | 0.673181  | 4.458723  | 0.913639  |
| N      | -0.666118 | -0.283220 | -0.291237 |
| C      | -1.970149 | -0.752218 | -0.296078 |
| C      | 0.226899  | -1.277339 | -0.670486 |
| C      | -1.892041 | -2.101453 | -0.712469 |
| C      | -0.552283 | -2.422407 | -0.935433 |
| H      | -2.737470 | -2.760666 | -0.838456 |
| H      | -0.161605 | -3.376433 | -1.259365 |
| C      | 2.030284  | 0.355668  | -0.416655 |
| C      | 1.590908  | -0.927109 | -0.708112 |
| C      | -2.998792 | 0.171693  | 0.067194  |
| C      | -2.647350 | 1.474325  | 0.384192  |
| H      | -3.408226 | 2.185015  | 0.686128  |
| C      | -4.418663 | -0.261002 | 0.102232  |
| C      | -5.420576 | 0.562198  | -0.438906 |
| C      | -4.793310 | -1.479223 | 0.694377  |
| C      | -6.759188 | 0.175716  | -0.392854 |

|   |           |           |           |
|---|-----------|-----------|-----------|
| H | -5.144027 | 1.497676  | -0.915257 |
| C | -6.133488 | -1.861621 | 0.742435  |
| H | -4.036582 | -2.114139 | 1.143135  |
| C | -7.120176 | -1.037503 | 0.197395  |
| H | -7.519382 | 0.820158  | -0.823759 |
| H | -6.406696 | -2.801491 | 1.212487  |
| H | -8.162852 | -1.338175 | 0.232673  |
| H | 2.304679  | -1.688744 | -1.002533 |
| C | 3.474561  | 0.711584  | -0.624386 |
| 8 | 3.772331  | 1.718452  | -1.257912 |
| C | 4.538050  | -0.193615 | -0.084652 |
| C | 5.828085  | -0.096553 | -0.633550 |
| C | 4.310202  | -1.084496 | 0.976464  |
| C | 6.862889  | -0.888000 | -0.146056 |
| H | 5.995666  | 0.604328  | -1.444189 |
| C | 5.352640  | -1.867606 | 1.473103  |
| H | 3.326144  | -1.150638 | 1.427489  |
| C | 6.626573  | -1.775441 | 0.909589  |
| H | 7.853943  | -0.814811 | -0.583350 |
| H | 5.170434  | -2.546114 | 2.300703  |
| H | 7.435465  | -2.390031 | 1.293236  |

Table S8:  $S_0$ : pyrimido[4',5',6':9,1]pyrrolo[2',1',5':4,5,6]quinolizino[3,2-b]quinoline

E = -949.34 Hartree

| Symbol | X        | Y         | Z         |
|--------|----------|-----------|-----------|
| C      | 0.821375 | 1.305621  | -0.000047 |
| C      | 1.952610 | 0.480296  | -0.000080 |
| C      | 3.242269 | 1.044415  | -0.000139 |
| N      | 1.806653 | -0.879840 | -0.000057 |
| C      | 0.605821 | -1.555064 | -0.000001 |
| C      | 2.876026 | -1.768427 | -0.000089 |
| C      | 0.916013 | -2.918237 | 0.000007  |
| C      | 2.313185 | -3.052699 | -0.000054 |
| H      | 0.181176 | -3.706451 | 0.000048  |
| H      | 2.872392 | -3.974991 | -0.000069 |
| C      | 4.367839 | 0.153128  | -0.000172 |

|   |           |           |           |
|---|-----------|-----------|-----------|
| H | 5.358267  | 0.588931  | -0.000218 |
| C | 4.178399  | -1.204271 | -0.000148 |
| C | -0.603735 | -0.771955 | 0.000035  |
| C | -0.494879 | 0.670764  | 0.000012  |
| H | 5.026928  | -1.877584 | -0.000174 |
| C | -2.906125 | 0.757547  | 0.000103  |
| C | -2.904558 | -0.679447 | 0.000121  |
| C | -5.329057 | -0.657327 | 0.000211  |
| H | -6.274859 | -1.187468 | 0.000253  |
| C | -5.329351 | 0.762223  | 0.000192  |
| H | -6.272487 | 1.296108  | 0.000221  |
| N | -1.767375 | -1.409215 | 0.000088  |
| C | -1.662187 | 1.409857  | 0.000048  |
| C | -4.145174 | 1.453129  | 0.000140  |
| H | -4.134623 | 2.537898  | 0.000126  |
| H | -1.599674 | 2.492304  | 0.000031  |
| C | -4.152073 | -1.361362 | 0.000177  |
| H | -4.131332 | -2.444175 | 0.000190  |
| C | 2.239017  | 3.090116  | -0.000126 |
| H | 2.349640  | 4.170391  | -0.000144 |
| N | 0.977294  | 2.637239  | -0.000070 |
| N | 3.370867  | 2.388273  | -0.000162 |

Table S9: **S1**: 5,13-diphenylpyrimido[4',5',6':9,1]pyrrolo[2',1',5':4,5,6]quinolizino[3,2-b]quinoline (**5a**)

E = -1411.16 Hartree

| Symbol | X         | Y         | Z         |
|--------|-----------|-----------|-----------|
| C      | -0.049461 | -3.262482 | -0.123383 |
| N      | -0.959016 | -2.278473 | -0.104108 |
| C      | -0.509464 | -0.994037 | -0.058933 |
| C      | 0.897089  | -0.817512 | -0.045358 |
| C      | 1.779603  | -1.906019 | -0.071062 |
| N      | 1.283732  | -3.182302 | -0.106433 |
| H      | -0.458711 | -4.270976 | -0.158399 |
| N      | 1.432059  | 0.436697  | -0.020204 |
| C      | 0.664836  | 1.585533  | -0.053857 |
| C      | 2.781570  | 0.735087  | -0.016627 |

---

|   |           |           |           |
|---|-----------|-----------|-----------|
| C | 1.573468  | 2.680286  | -0.076968 |
| C | 2.858875  | 2.173546  | -0.059465 |
| H | 1.279054  | 3.718715  | -0.110879 |
| H | 3.777778  | 2.740793  | -0.087881 |
| C | 3.178933  | -1.639309 | -0.048887 |
| H | 3.851353  | -2.491345 | -0.036615 |
| C | 3.705717  | -0.337945 | -0.011086 |
| C | -1.387439 | 0.166125  | -0.039280 |
| C | -0.767360 | 1.477715  | -0.066290 |
| C | -2.802470 | 0.131642  | -0.014681 |
| C | -3.523320 | 1.380147  | -0.047850 |
| C | -2.785313 | 2.614307  | -0.097464 |
| N | -1.419810 | 2.638743  | -0.098313 |
| C | -3.607189 | -1.125478 | 0.074662  |
| C | -3.879399 | -1.708957 | 1.321663  |
| C | -4.173539 | -1.699160 | -1.073981 |
| C | -4.669535 | -2.858002 | 1.415611  |
| H | -3.459721 | -1.265252 | 2.221422  |
| C | -4.963041 | -2.848987 | -0.983523 |
| H | -3.982842 | -1.248769 | -2.045253 |
| C | -5.210794 | -3.435339 | 0.262144  |
| H | -4.862535 | -3.301246 | 2.389680  |
| H | -5.384531 | -3.285787 | -1.885770 |
| H | -5.824472 | -4.329854 | 0.333826  |
| C | -4.935465 | 1.462750  | -0.025341 |
| C | -5.592546 | 2.694158  | -0.064185 |
| H | -6.679069 | 2.718789  | -0.047040 |
| C | -4.864299 | 3.893428  | -0.123128 |
| H | -5.381599 | 4.848281  | -0.153848 |
| C | -3.472817 | 3.848756  | -0.137100 |
| H | -2.879802 | 4.758404  | -0.175771 |
| H | -5.519998 | 0.550555  | 0.021823  |
| C | 5.166994  | -0.104247 | 0.027893  |
| C | 6.027956  | -0.864511 | -0.786465 |
| C | 5.728428  | 0.857037  | 0.889799  |
| C | 7.408194  | -0.662648 | -0.745414 |
| H | 5.612552  | -1.599113 | -1.471049 |

---



|   |          |           |           |
|---|----------|-----------|-----------|
| C | 7.109726 | 1.054526  | 0.930939  |
| H | 5.086578 | 1.428202  | 1.554582  |
| C | 7.954635 | 0.298078  | 0.112303  |
| H | 8.056197 | -1.252052 | -1.388558 |
| H | 7.526002 | 1.793518  | 1.610344  |
| H | 9.029570 | 0.453561  | 0.144676  |

Table S10: **S1**: *N,N*-dimethyl-5,13-diphenylpyrimido[4',5',6':9,1]pyrrolo[2',1',5':4,5,6]quinolizino[3,2-*b*]quinolin-11-amine (**5k**)

E = -1545.15 Hartree

| Symbol | X         | Y         | Z         |
|--------|-----------|-----------|-----------|
| C      | -1.044098 | 3.407220  | -0.094817 |
| N      | -0.031823 | 2.536333  | -0.081978 |
| C      | -0.346353 | 1.205015  | -0.046364 |
| C      | -1.718674 | 0.869049  | -0.034195 |
| C      | -2.721383 | 1.855321  | -0.052674 |
| N      | -2.362286 | 3.178727  | -0.079119 |
| H      | -0.752672 | 4.457016  | -0.122747 |
| N      | -2.107089 | -0.440029 | -0.014355 |
| C      | -1.214719 | -1.500264 | -0.052515 |
| C      | -3.418669 | -0.887870 | -0.010379 |
| C      | -1.999087 | -2.675865 | -0.078361 |
| C      | -3.342896 | -2.308138 | -0.055745 |
| H      | -1.601289 | -3.680146 | -0.113400 |
| H      | -4.191485 | -2.976437 | -0.080061 |
| C      | -4.082553 | 1.436715  | -0.032896 |
| H      | -4.843867 | 2.210717  | -0.014326 |
| C      | -4.457421 | 0.093386  | -0.003451 |
| C      | 0.656948  | 0.148900  | -0.034527 |
| C      | 0.187337  | -1.233436 | -0.064619 |
| C      | 2.053583  | 0.350526  | -0.015615 |
| C      | 2.915675  | -0.805606 | -0.046390 |
| C      | 2.328779  | -2.112454 | -0.099911 |
| N      | 0.989314  | -2.306718 | -0.103552 |
| C      | 2.706581  | 1.693964  | 0.059740  |
| C      | 2.879161  | 2.336253  | 1.295638  |
| C      | 3.231962  | 2.299776  | -1.092214 |

---

|   |           |           |           |
|---|-----------|-----------|-----------|
| C | 3.534697  | 3.567436  | 1.374814  |
| H | 2.485623  | 1.873290  | 2.197304  |
| C | 3.883620  | 3.534432  | -1.016423 |
| H | 3.113871  | 1.808891  | -2.055385 |
| C | 4.035857  | 4.174189  | 0.217855  |
| H | 3.652612  | 4.053647  | 2.340322  |
| H | 4.272071  | 3.994768  | -1.921774 |
| H | 4.542661  | 5.134022  | 0.278517  |
| C | 4.318026  | -0.706053 | -0.009154 |
| C | 5.161796  | -1.850029 | -0.042609 |
| C | 4.556419  | -3.143687 | -0.114535 |
| H | 5.161167  | -4.040626 | -0.146085 |
| C | 3.182337  | -3.249604 | -0.138683 |
| H | 2.711164  | -4.227587 | -0.185601 |
| H | 4.759687  | 0.278403  | 0.050860  |
| C | -5.884848 | -0.302776 | 0.022920  |
| C | -6.824777 | 0.367283  | -0.784505 |
| C | -6.346286 | -1.330903 | 0.867805  |
| C | -8.176658 | 0.020907  | -0.749199 |
| H | -6.489122 | 1.150822  | -1.458564 |
| C | -7.698906 | -1.675806 | 0.902840  |
| H | -5.648098 | -1.842584 | 1.523866  |
| C | -8.620947 | -1.003564 | 0.093729  |
| H | -8.882092 | 0.547125  | -1.387299 |
| H | -8.033432 | -2.465879 | 1.570439  |
| H | -9.673157 | -1.274230 | 0.120262  |
| N | 6.521384  | -1.705970 | -0.003053 |
| C | 7.141457  | -0.382316 | 0.065409  |
| H | 8.223855  | -0.499757 | 0.076319  |
| H | 6.867387  | 0.226118  | -0.803828 |
| H | 6.840435  | 0.147084  | 0.976612  |
| C | 7.386161  | -2.883806 | -0.026629 |
| H | 7.240444  | -3.457629 | -0.949618 |
| H | 8.425853  | -2.565058 | 0.023675  |
| H | 7.179158  | -3.537546 | 0.828854  |

---

# <sup>1</sup>H-, <sup>13</sup>C- and <sup>19</sup>F-NMR Spectra

## **1-(4,6-dichloropyrimidin-5-yl)-1H-pyrrole-2-carbaldehyde (3)**

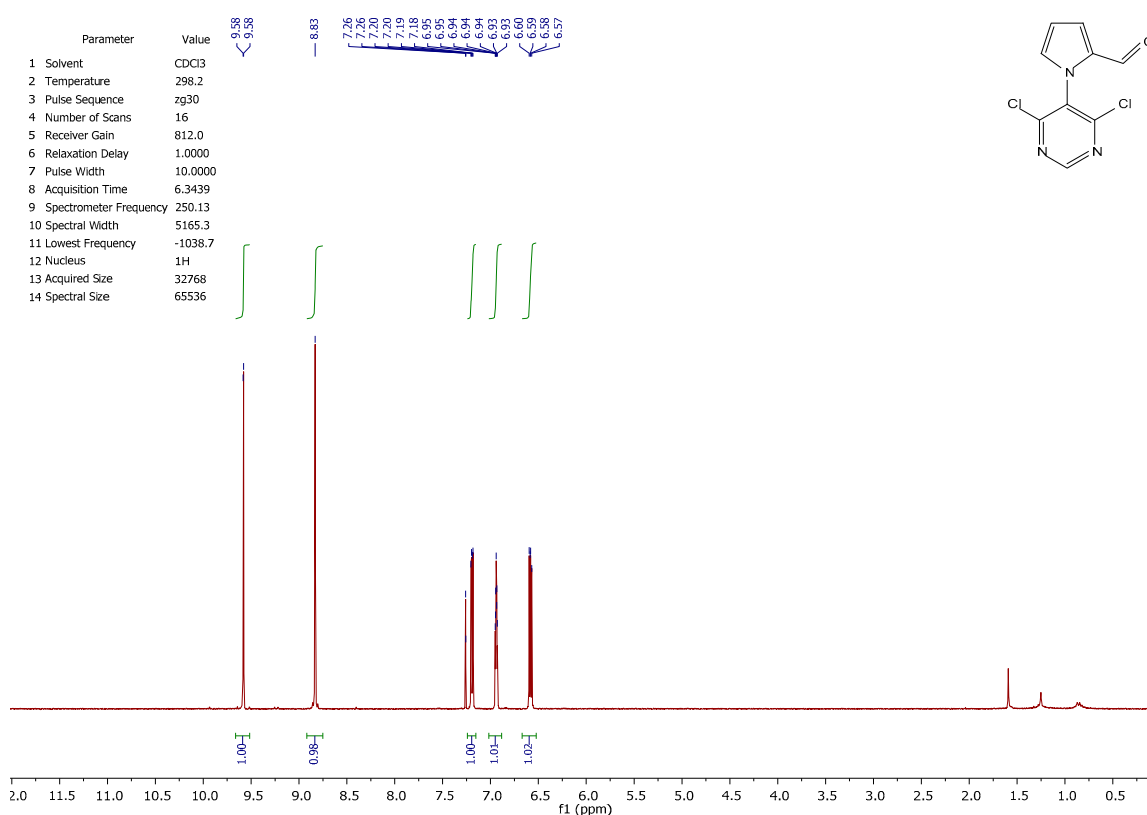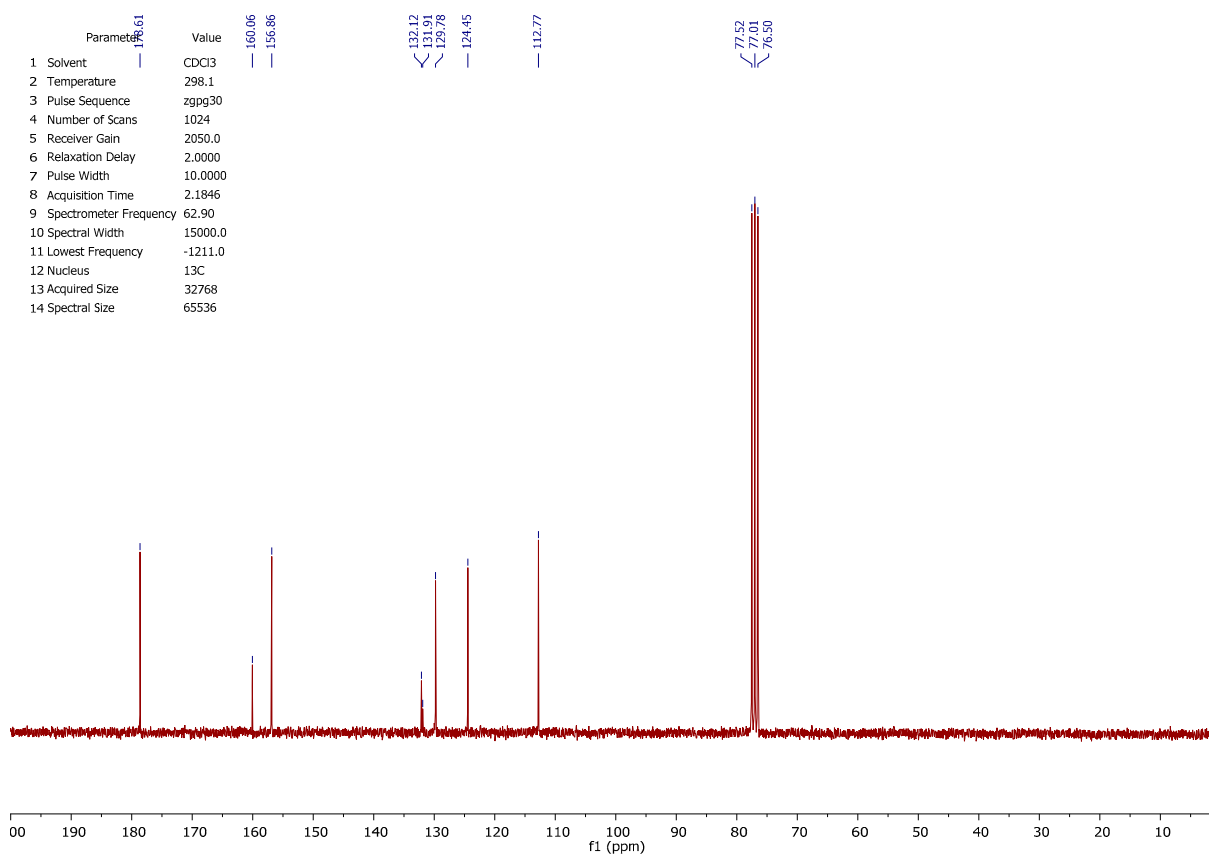

## **1-(4,6-bis(phenylethynyl)pyrimidin-5-yl)-1H-pyrrole-2-carbaldehyde (4a)**

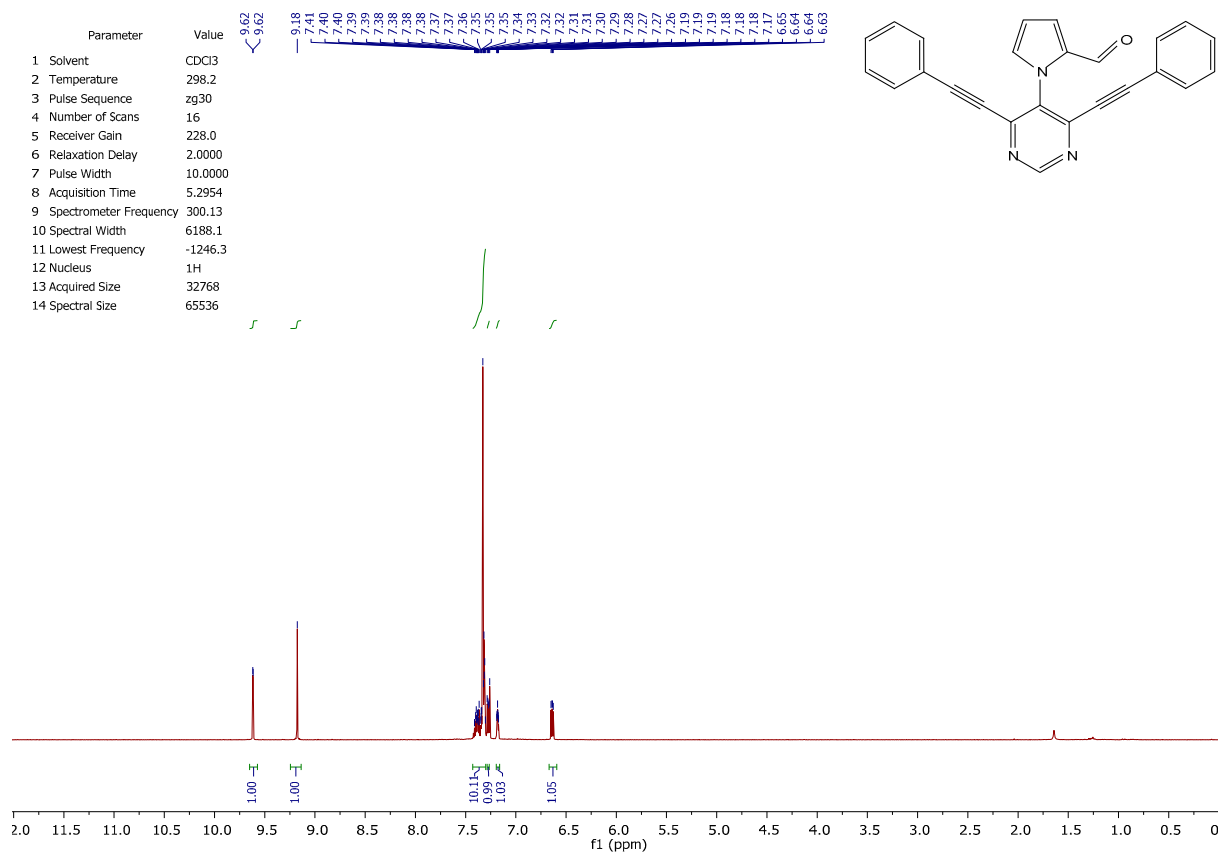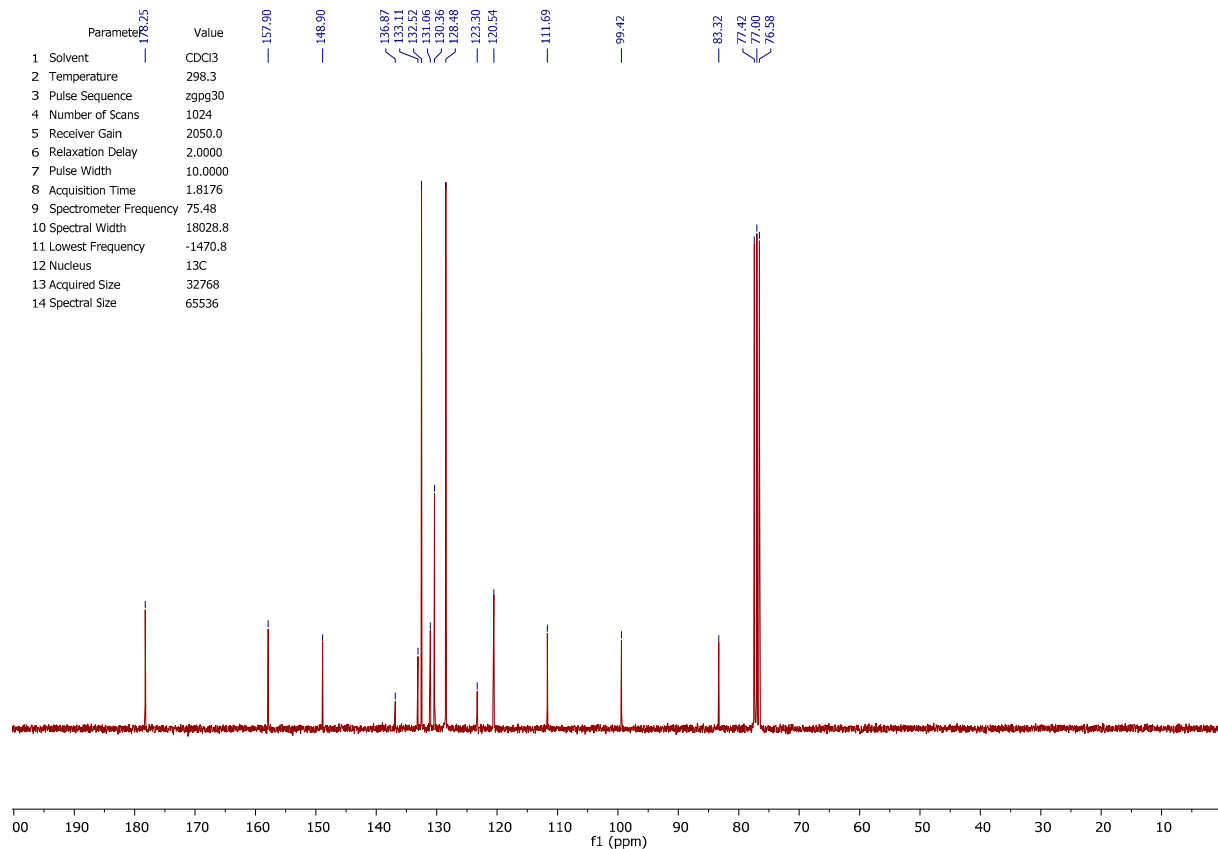

**1-(4,6-bis(*p*-tolylethynyl)pyrimidin-5-yl)-1*H*-pyrrole-2-carbaldehyde (4b)**

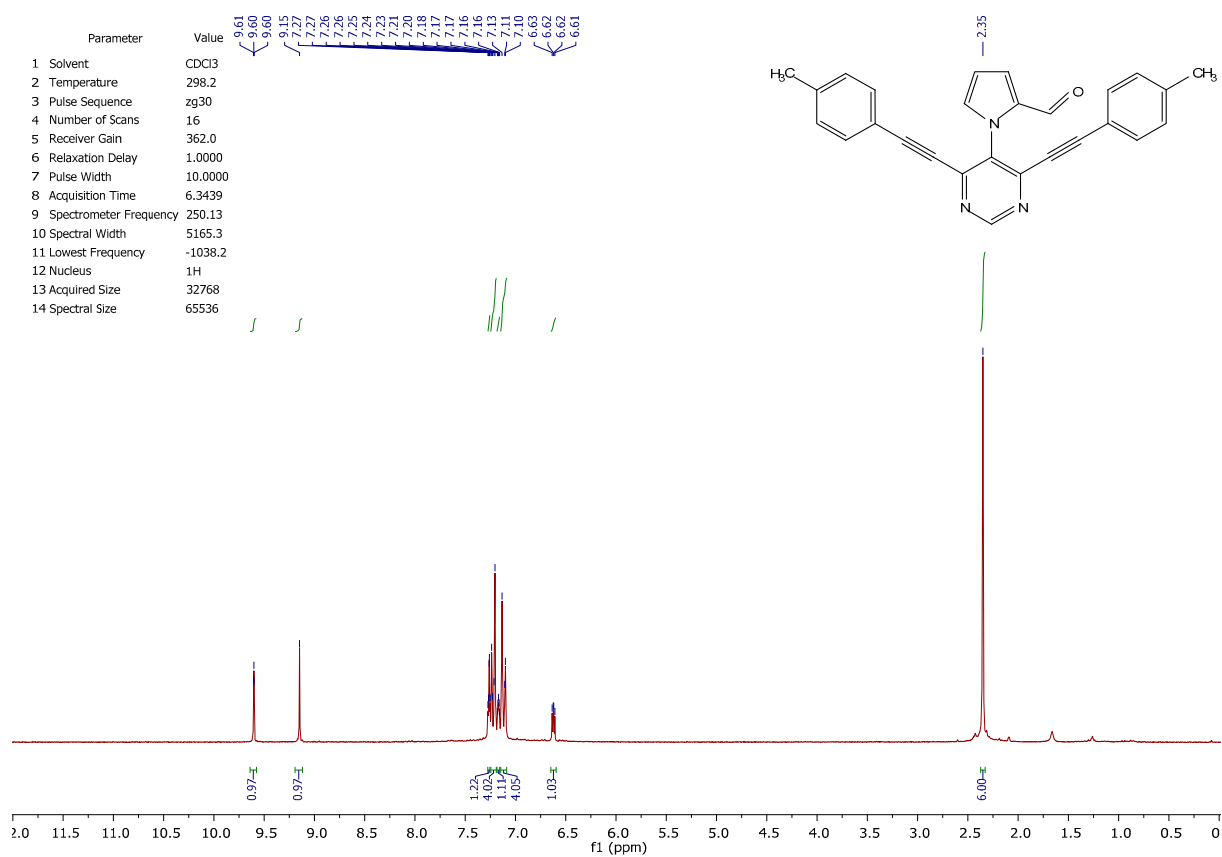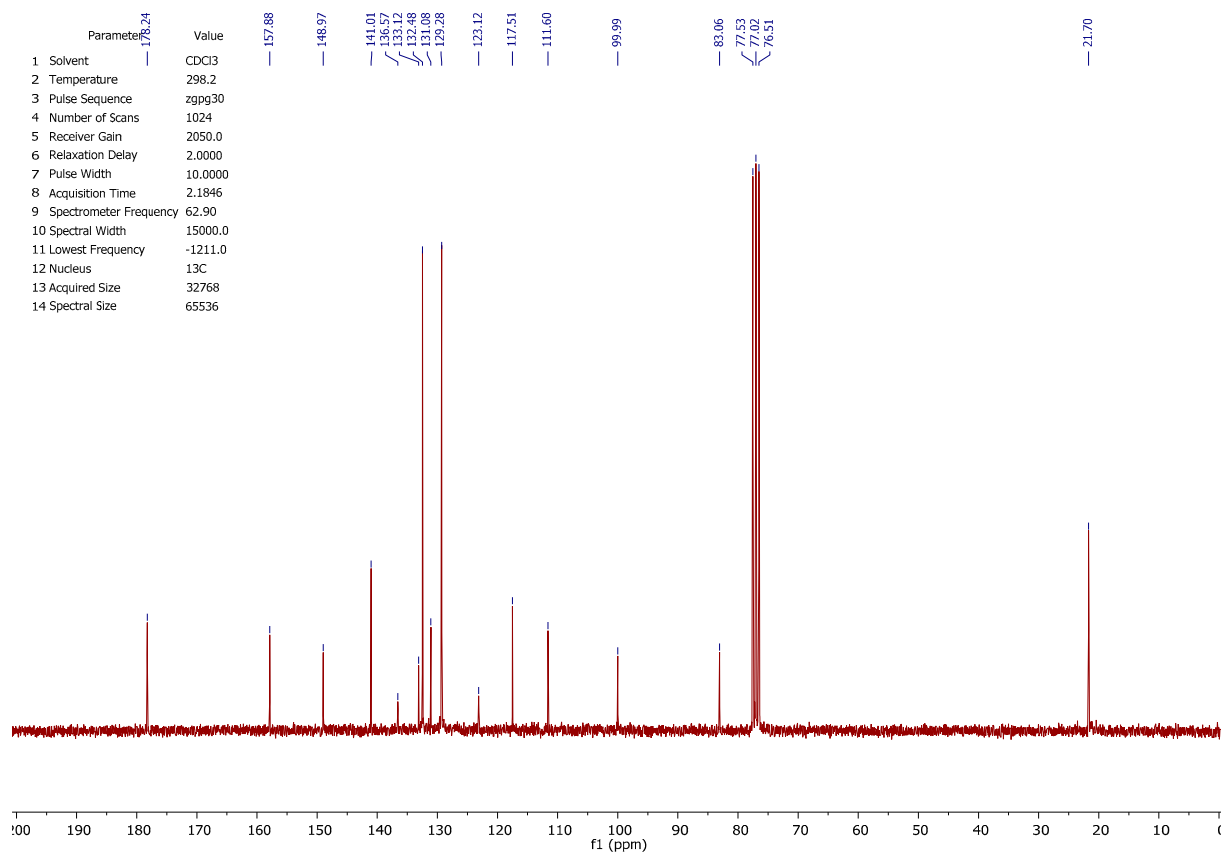

**1-(4,6-bis((4-fluorophenyl)ethynyl)pyrimidin-5-yl)-1H-pyrrole-2-carbaldehyde (4c)**

O=Cc1cc[nH]c1C2=CC(=CC=C2C#CC3=CC(=CC=C3)F)N=CN=C2C#CC4=CC(=CC=C4)F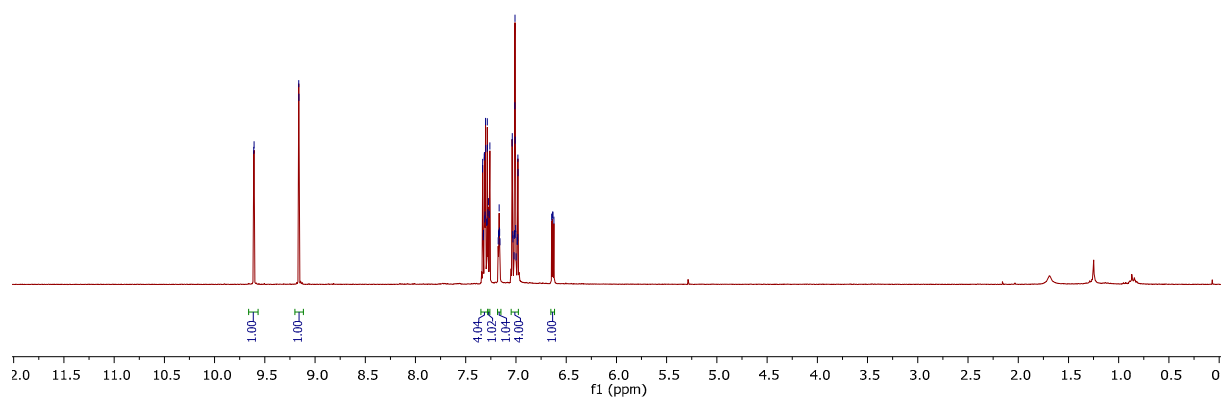[illegible]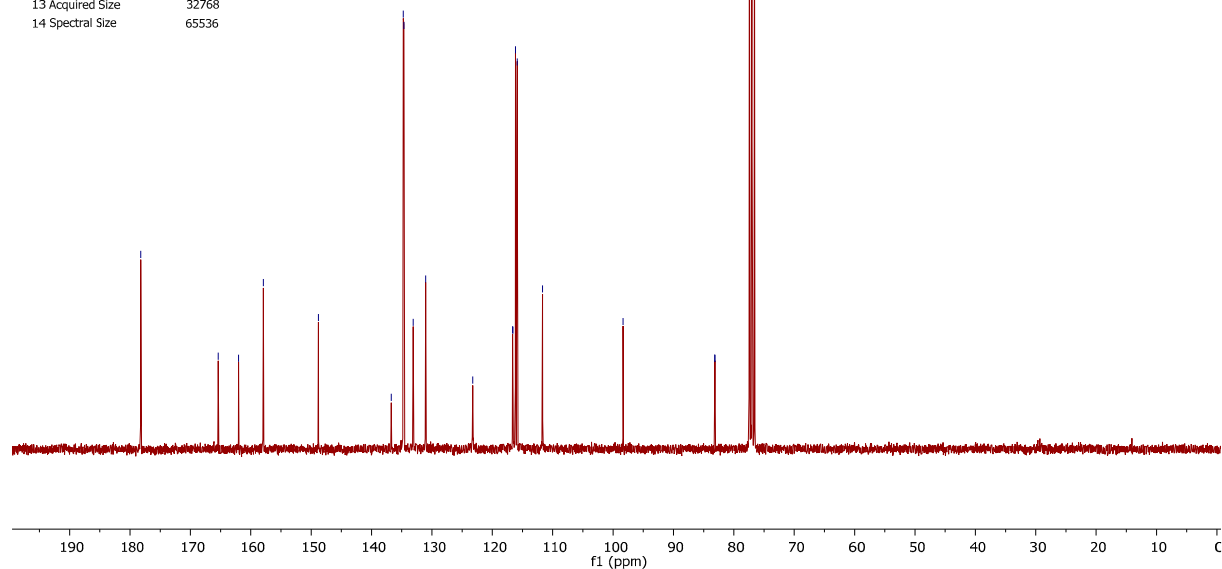

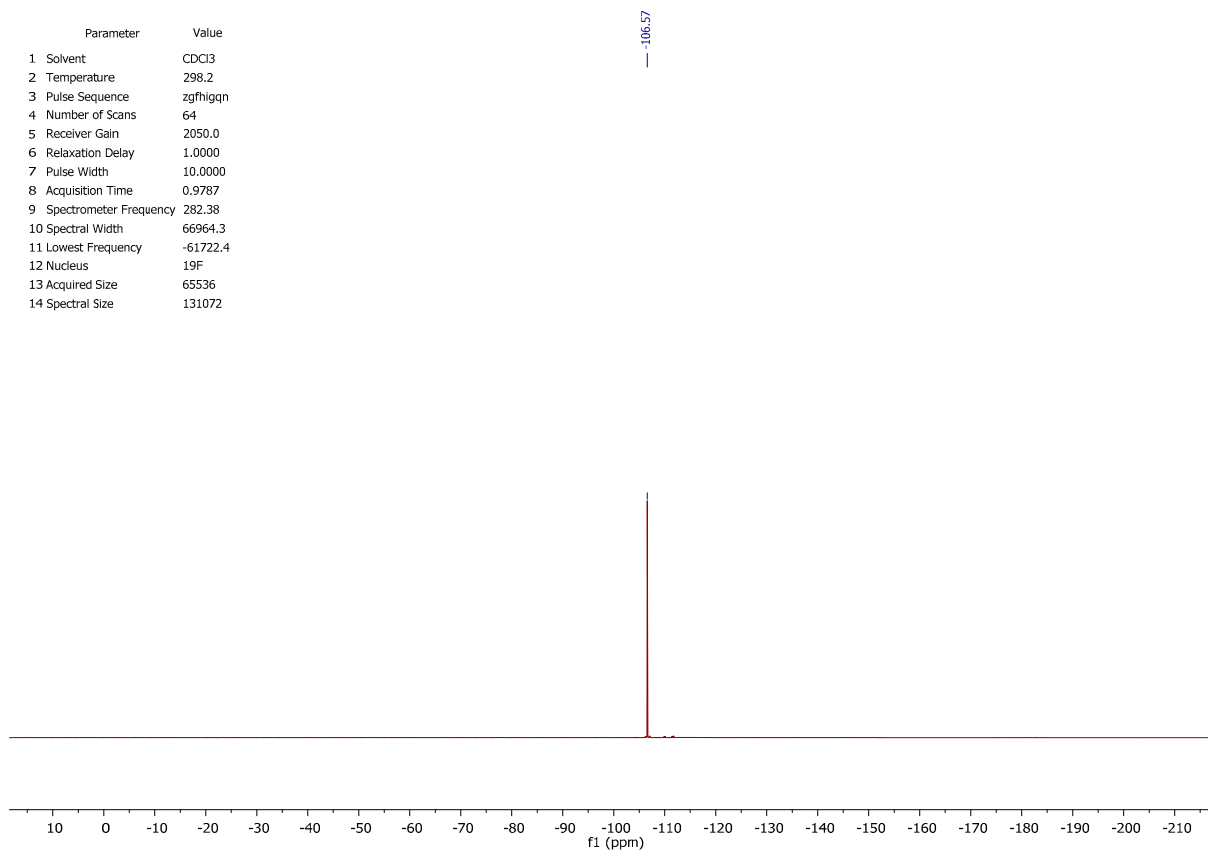

# **1-(4,6-Bis((4-(dimethylamino)phenyl)ethynyl)pyrimidin-5-yl)-1H-pyrrol-2-carbaldehyd (4d)**

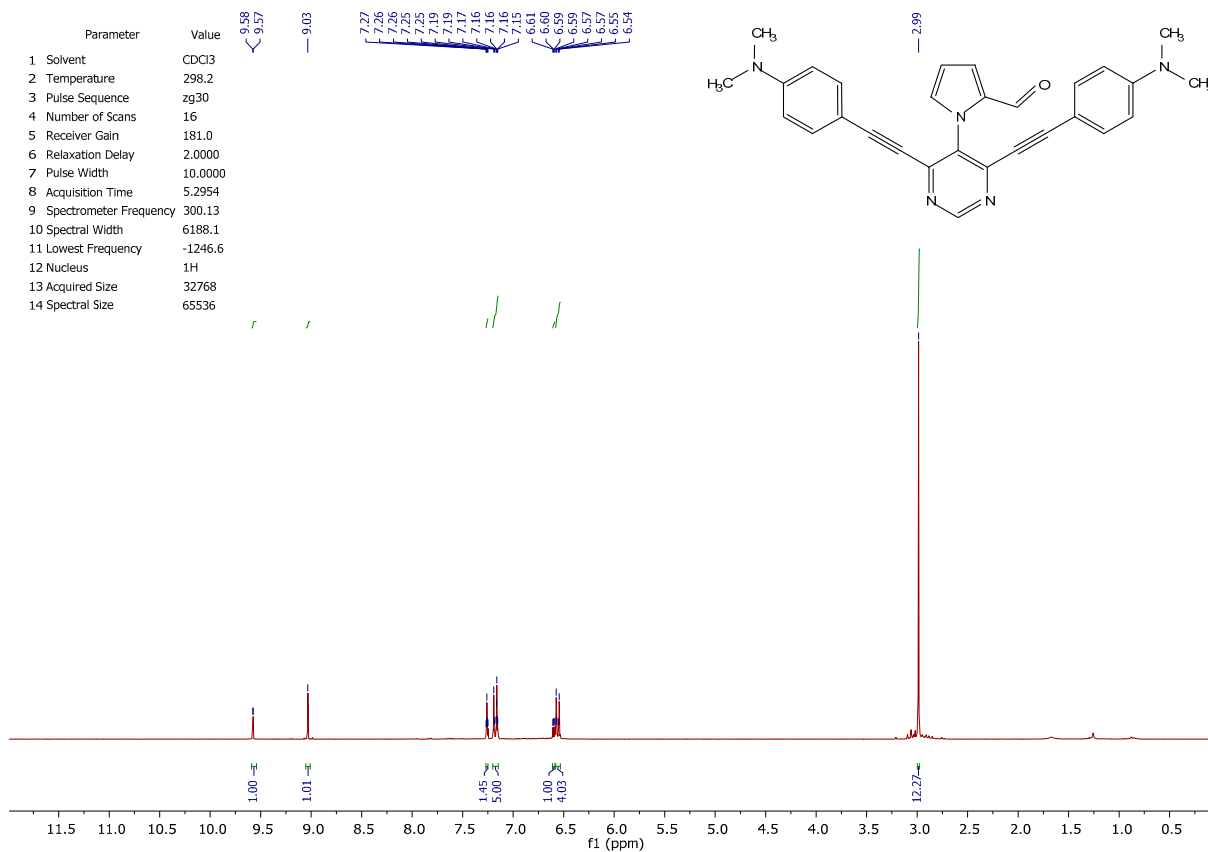

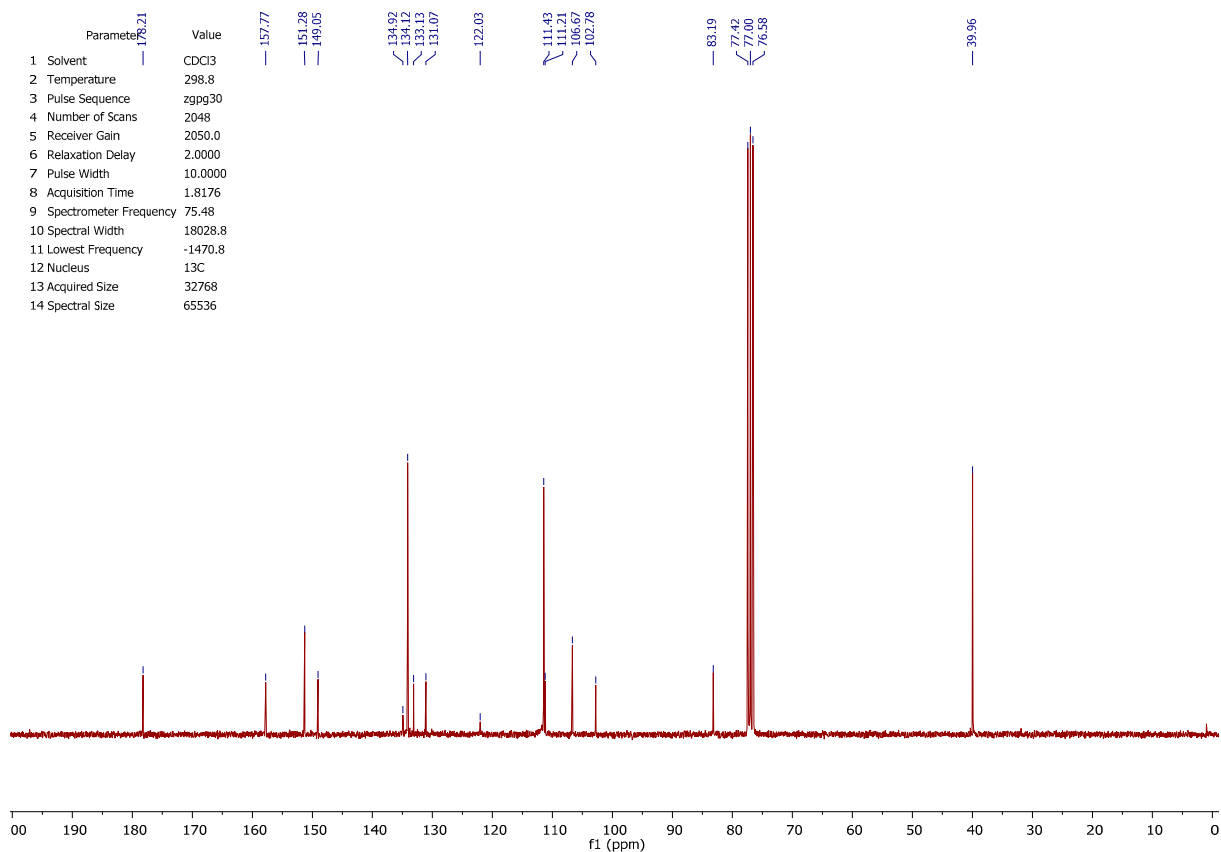

# 1-(4,6-bis((4-methoxyphenyl)ethynyl)pyrimidin-5-yl)-1H-pyrrole-2-carbaldehyde (4e)

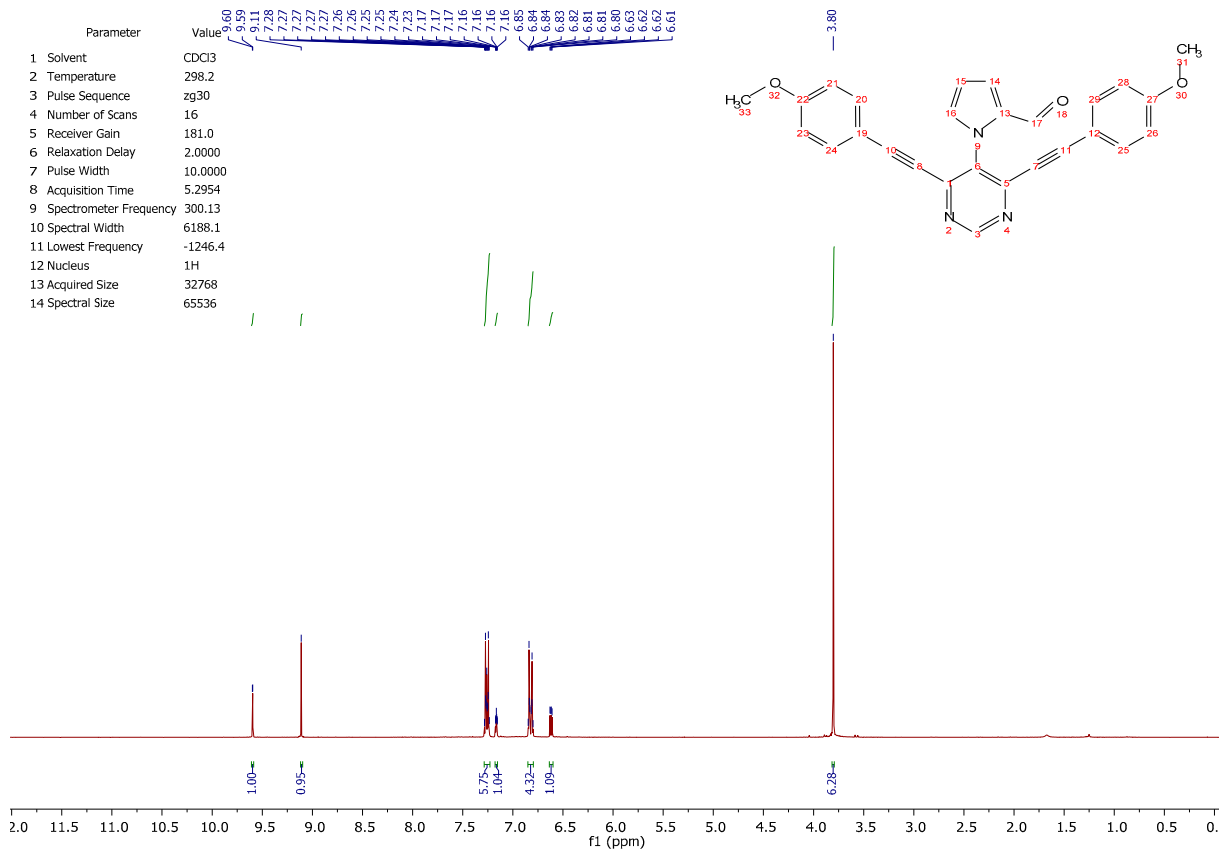



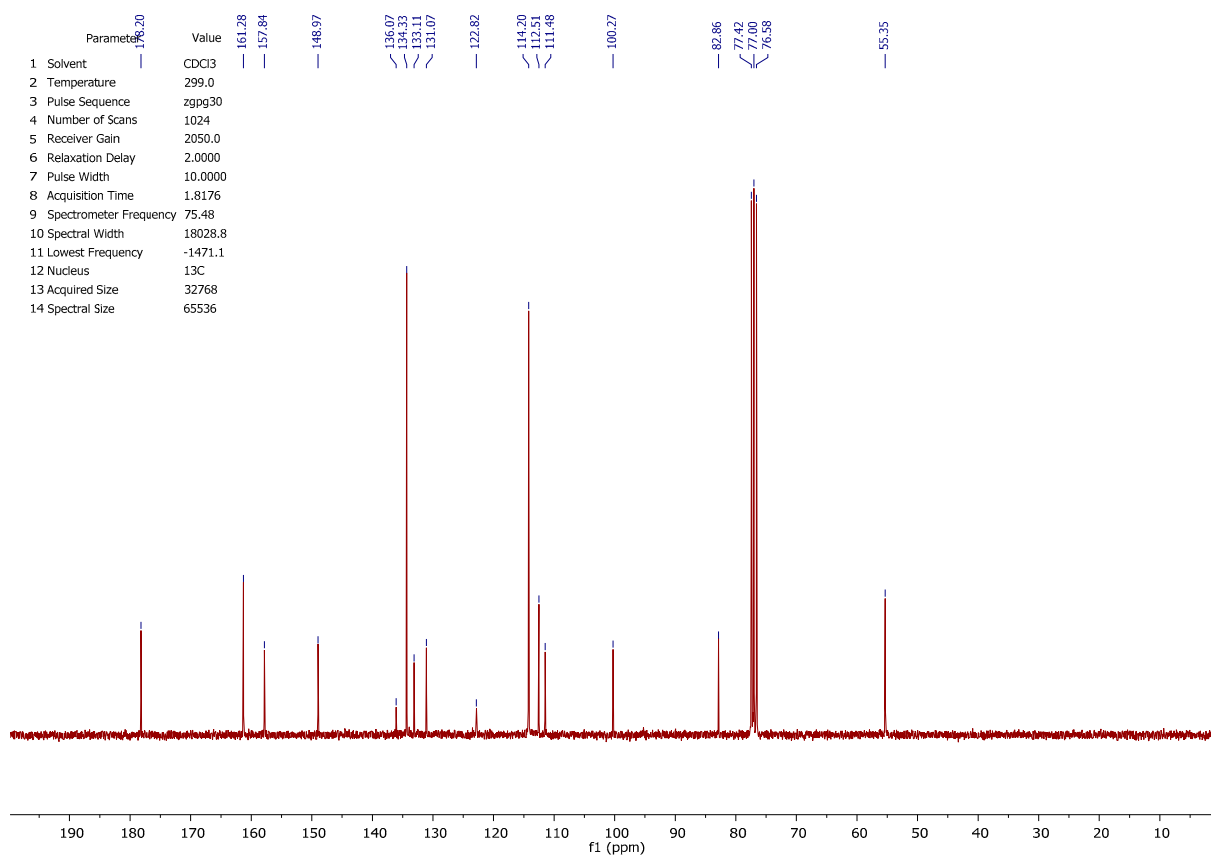

# 1-(4,6-bis((4-(trifluoromethyl)phenyl)ethynyl)pyrimidin-5-yl)-1H-pyrrole-2-carbaldehyde (4f)

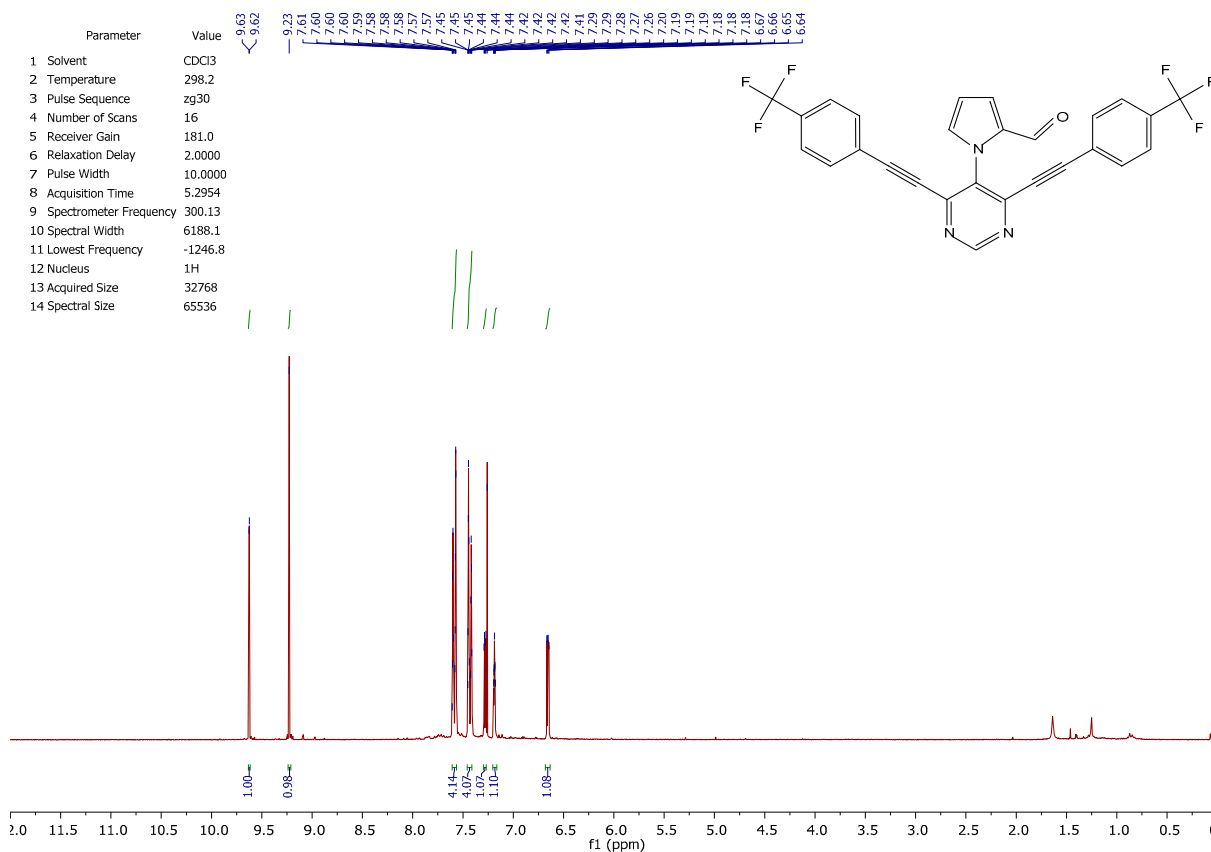

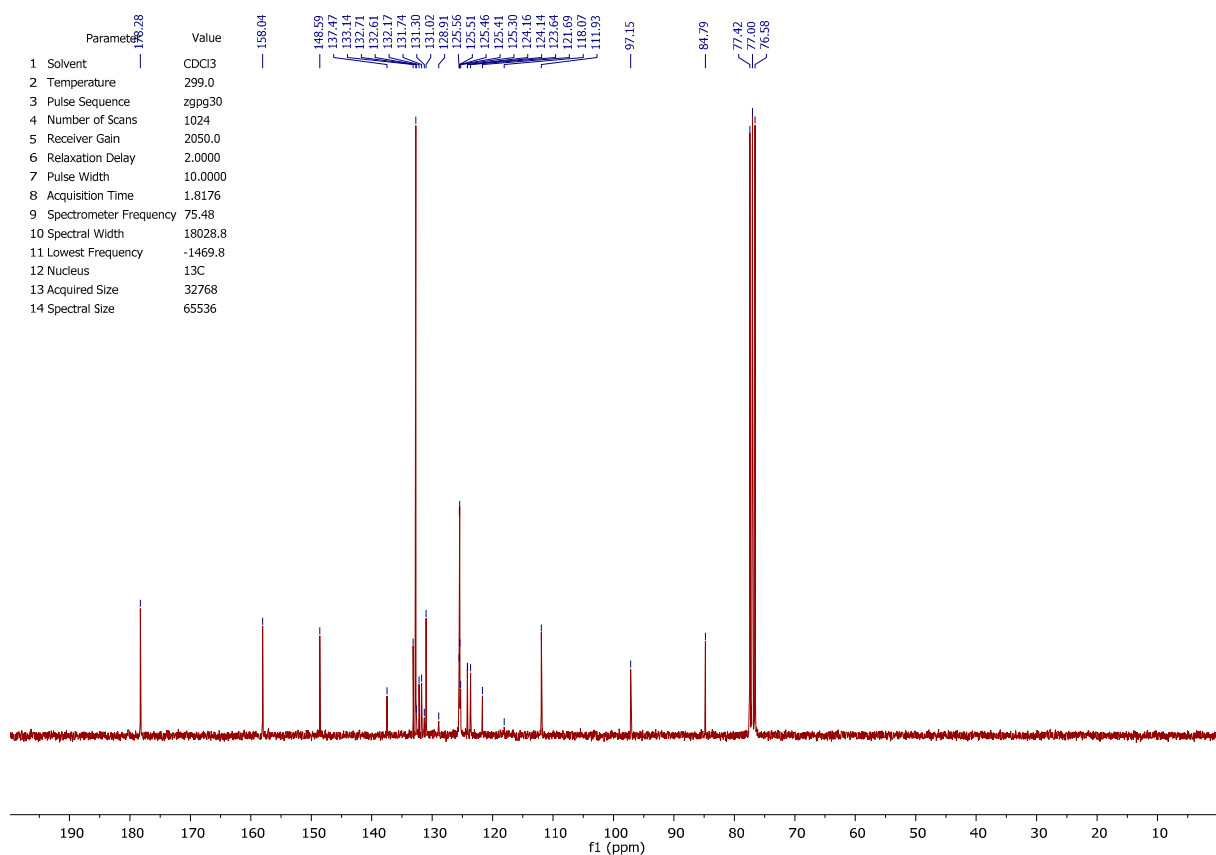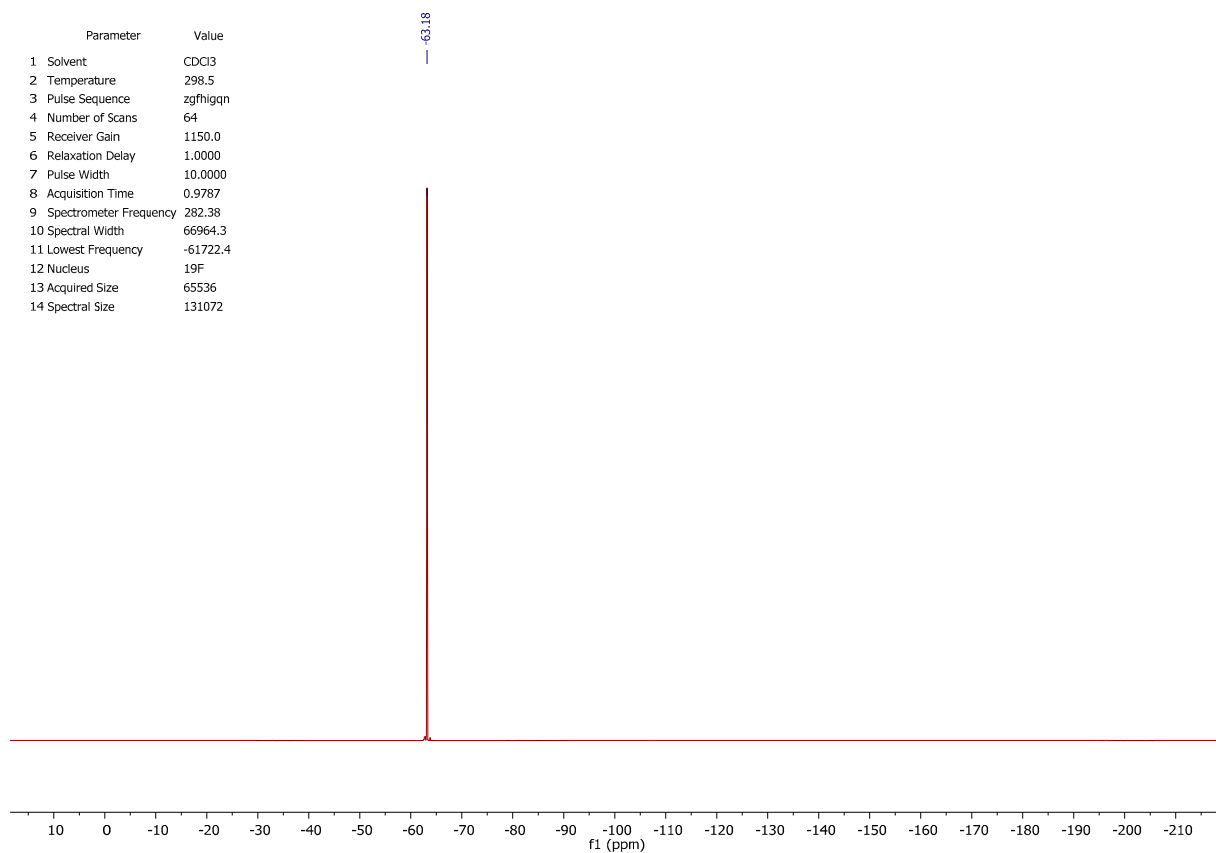

**5,13-diphenylpyrimido[4',5',6':9,1]pyrrolo[2',1',5':4,5,6]quinolizino[3,2-*b*]quinoline (5a)**

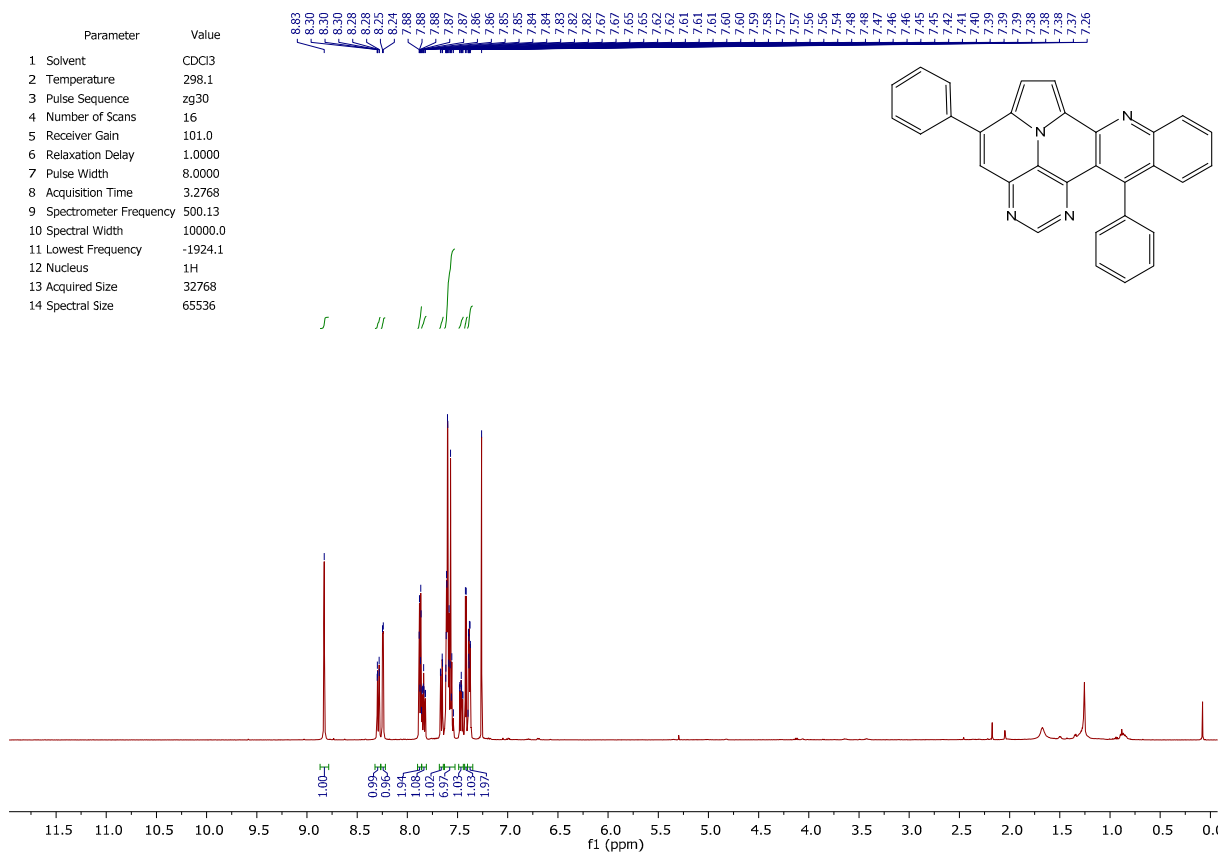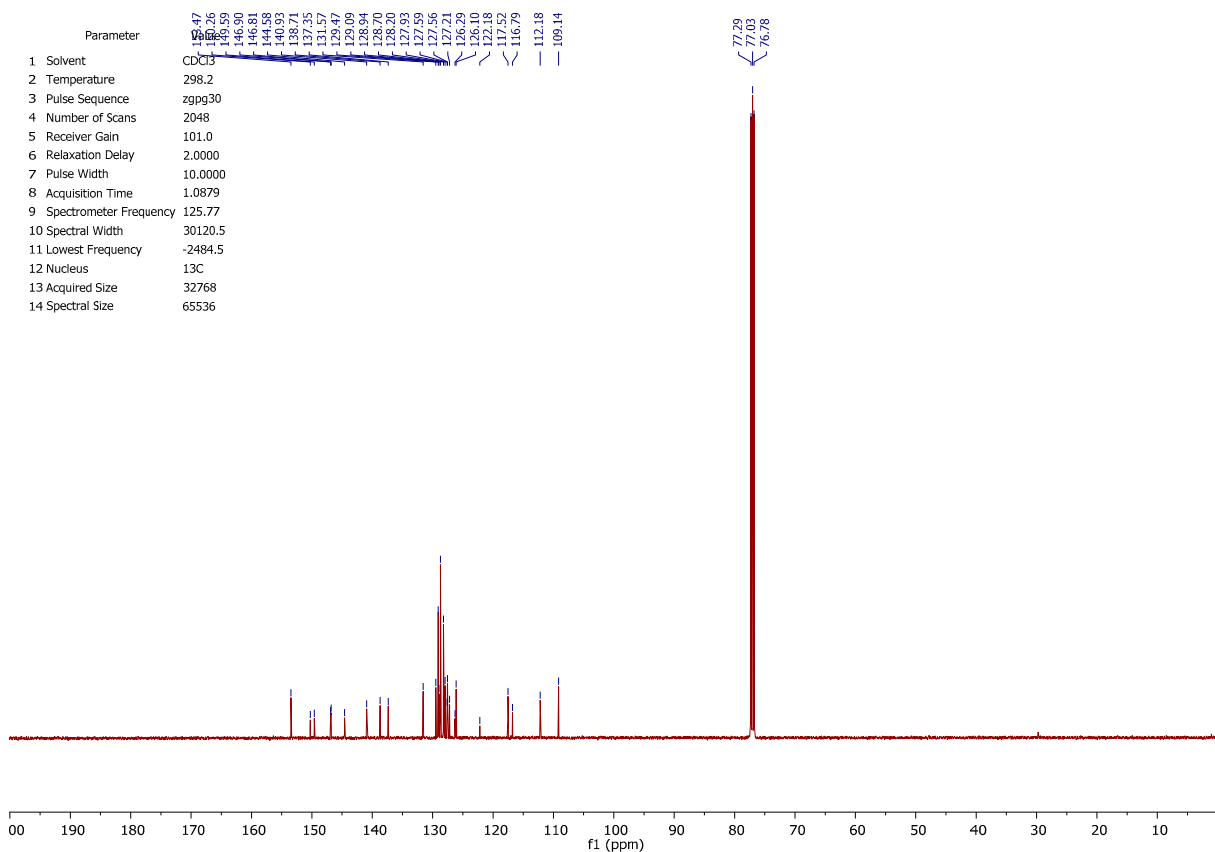

5,13-di-*p*-tolylpyrimido[4',5',6':9,1]pyrrolo[2',1',5':4,5,6]quinolizino[3,2-*b*]quinoline (5b)

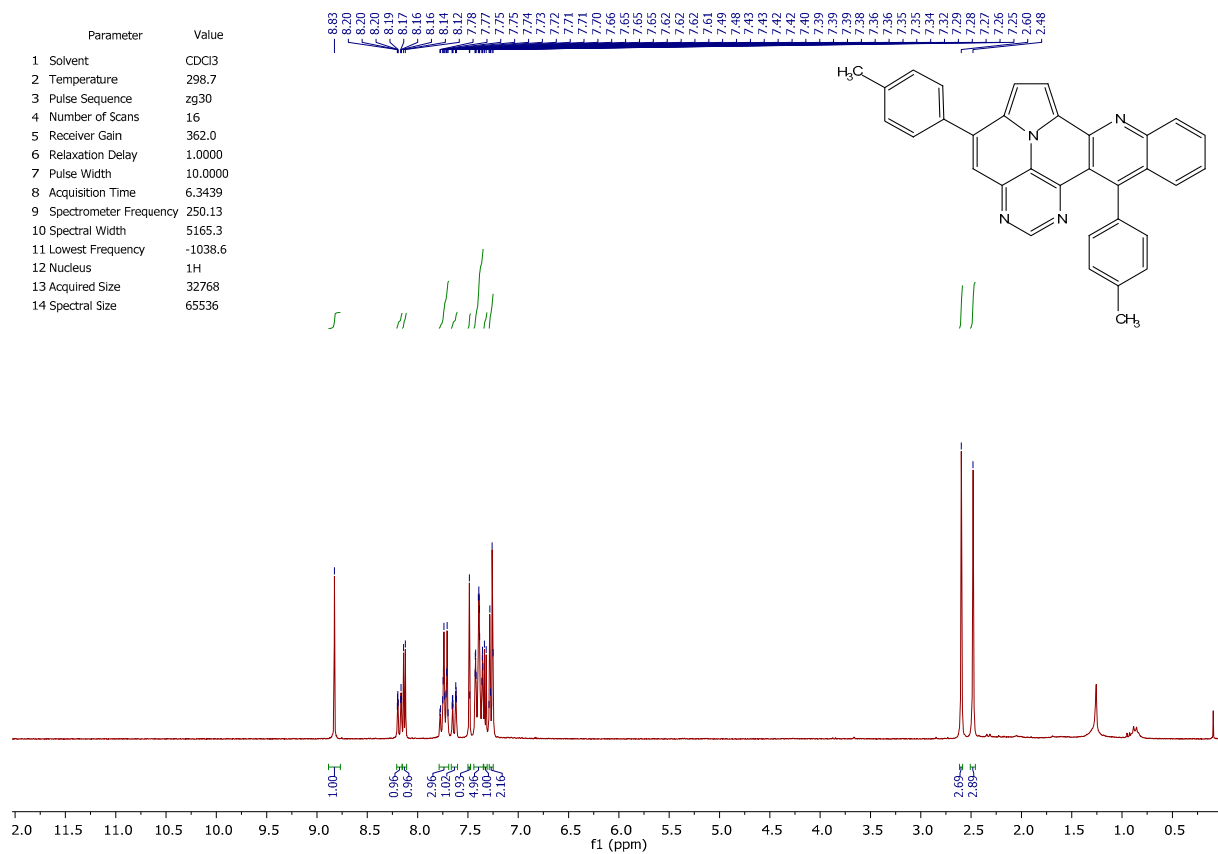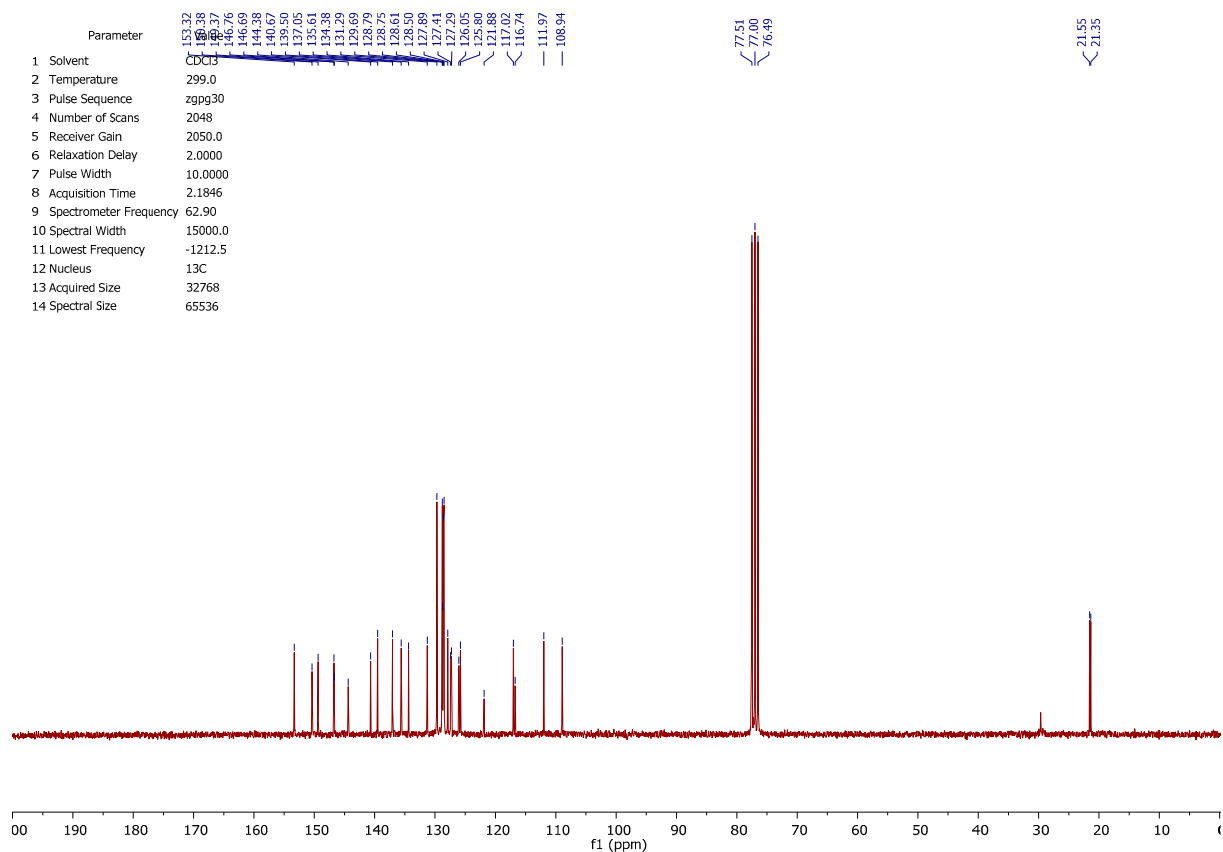

5,13-bis(4-fluorophenyl)pyrimido[4',5',6':9,1]pyrrolo[2',1':5',4,5,6]quinolizino[3,2-*b*]quinoline (5c)

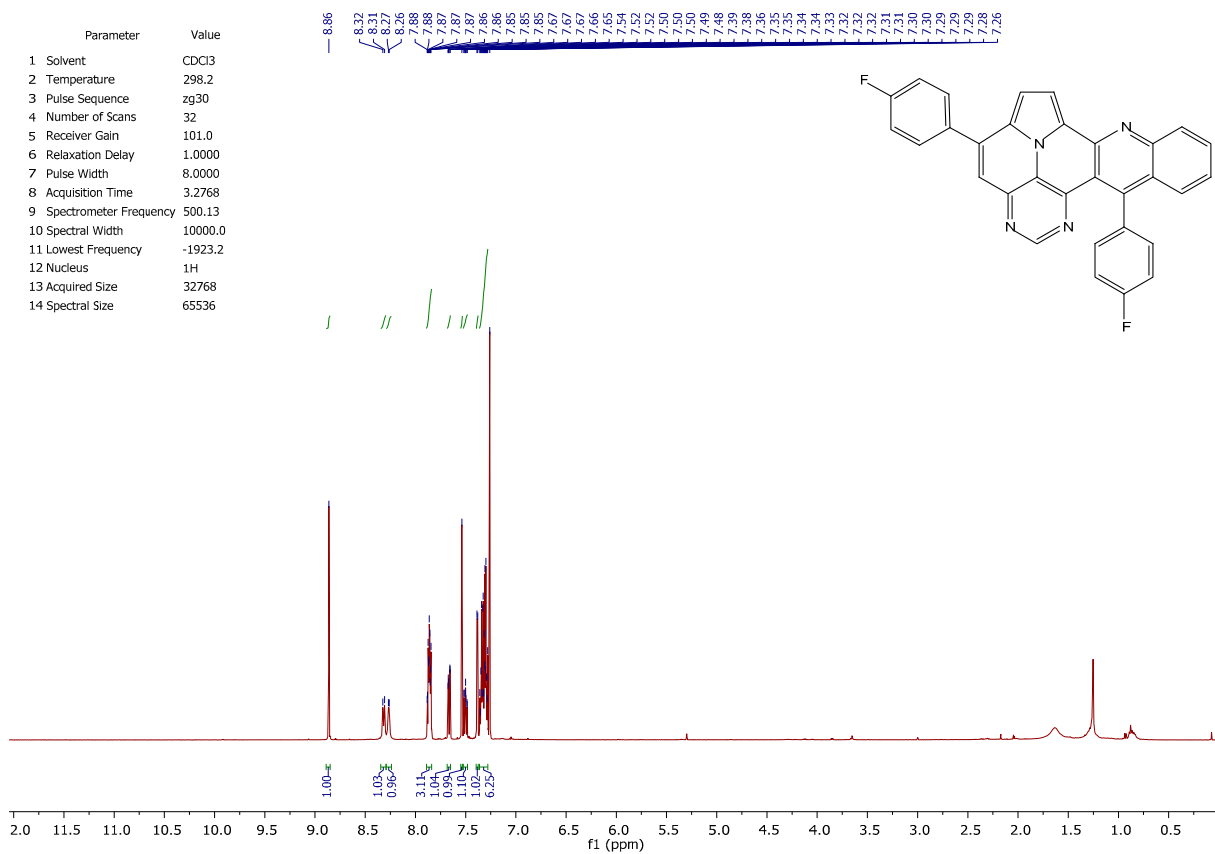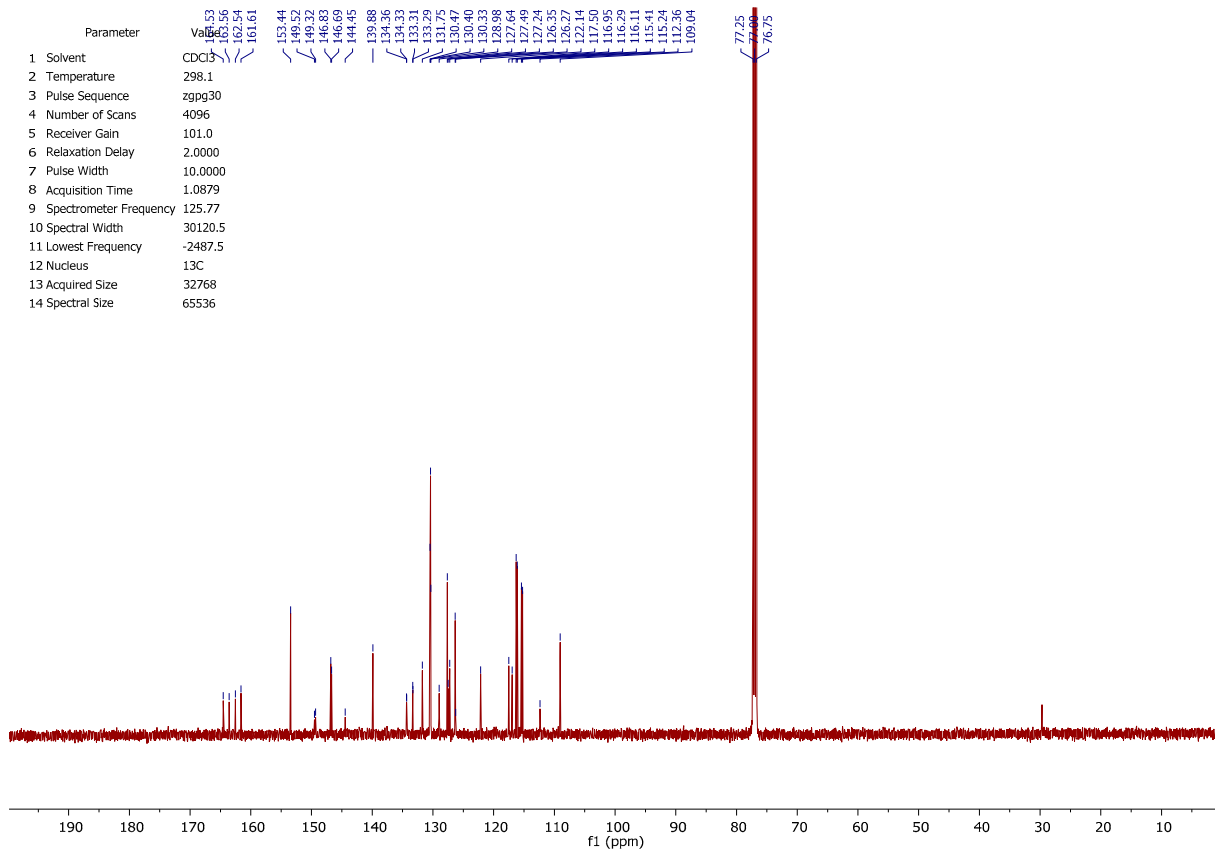

— -111.37  
— -114.74

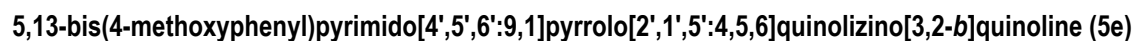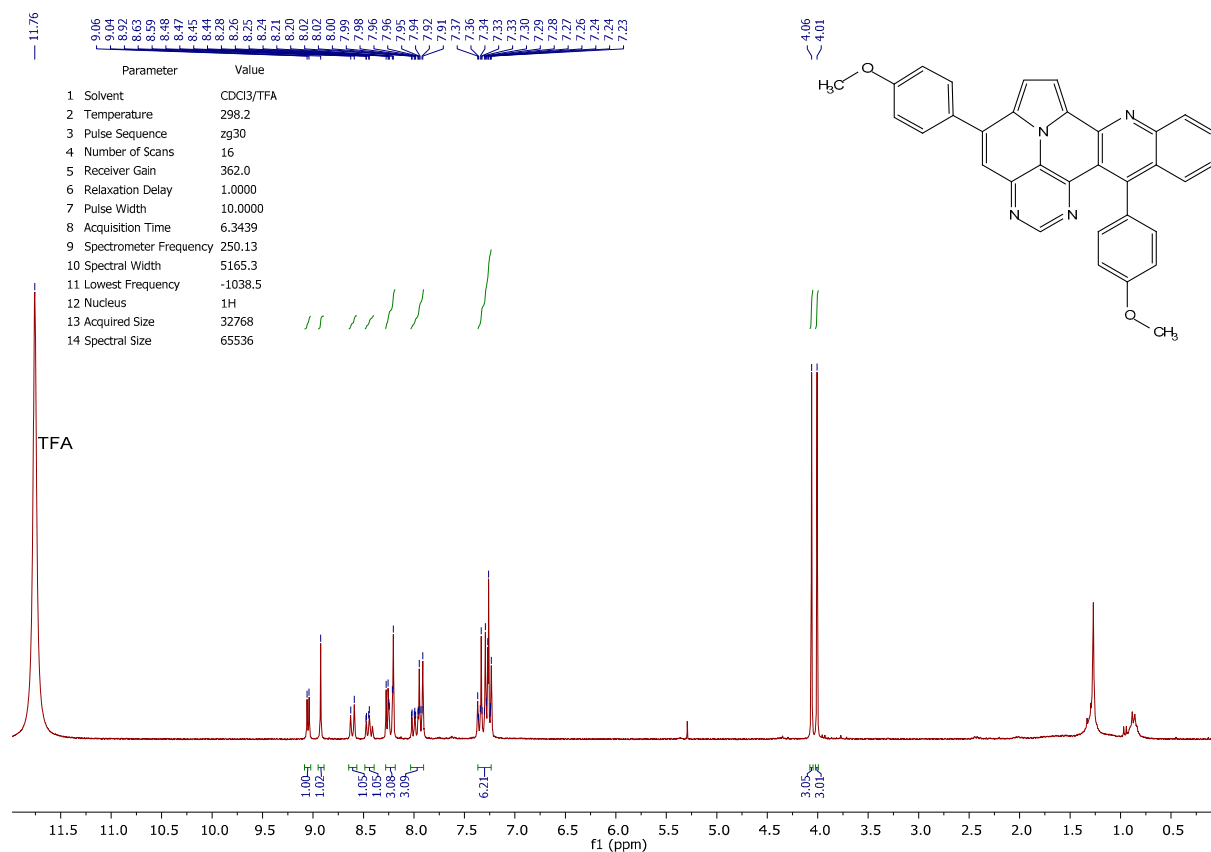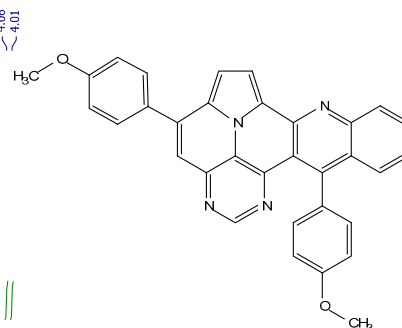

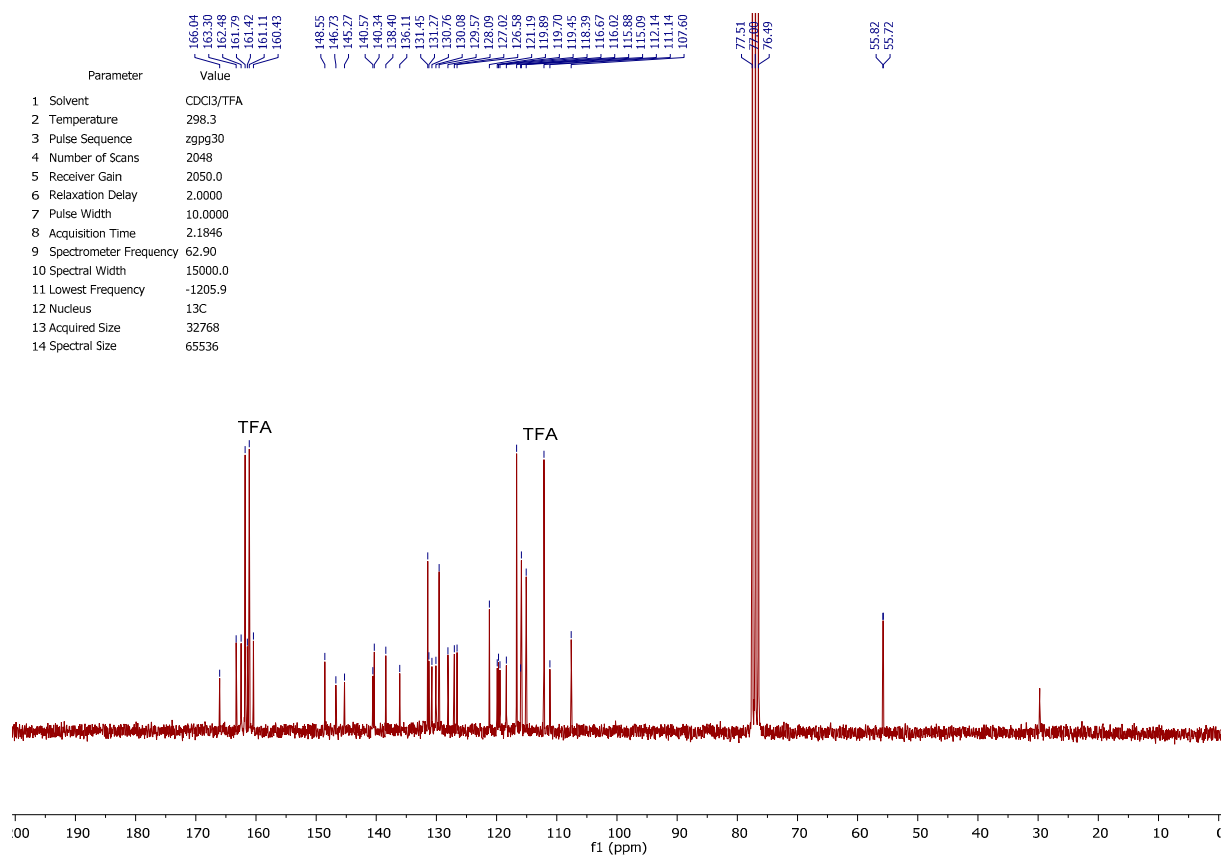

# 11-methyl-5,13-diphenylpyrimido[4',5',6':9,1]pyrrolo[2',1',5':4,5,6]quinolizino[3,2-*b*]quinoline (5g)

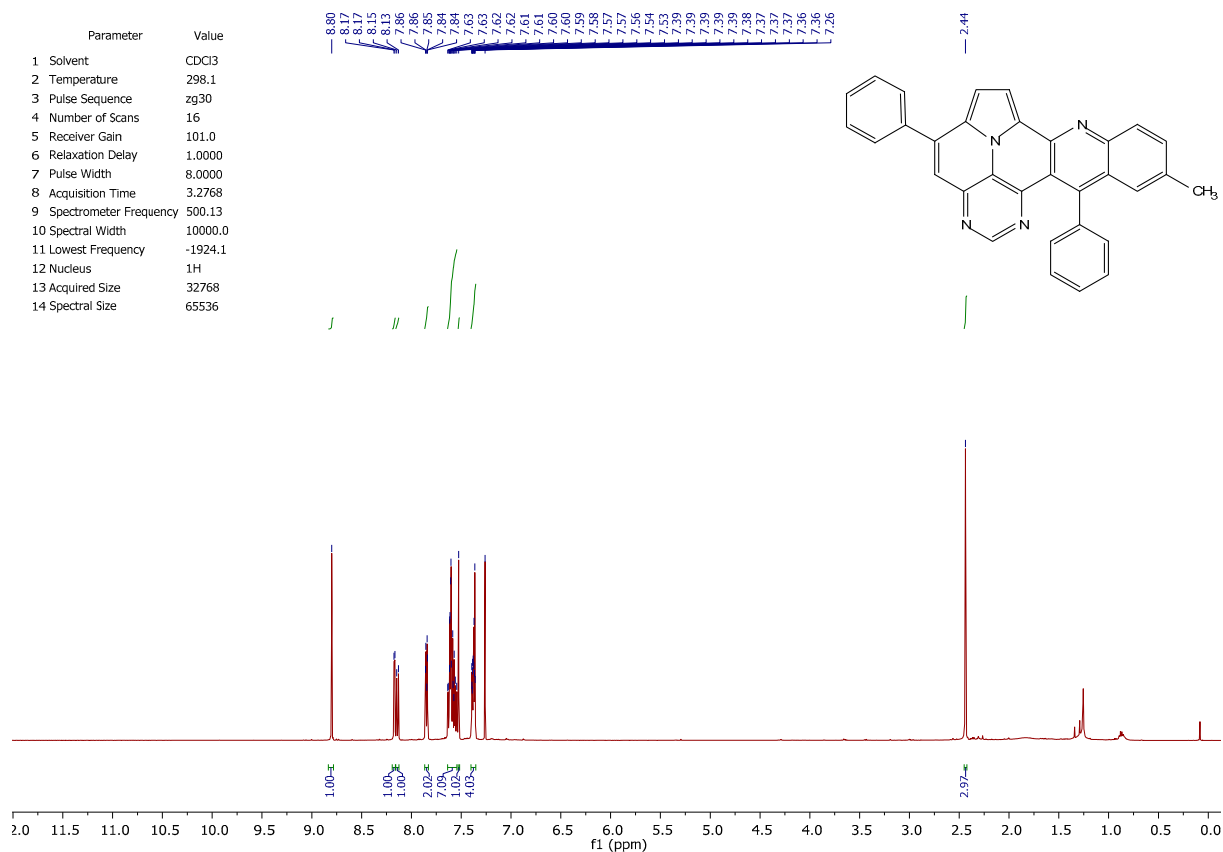

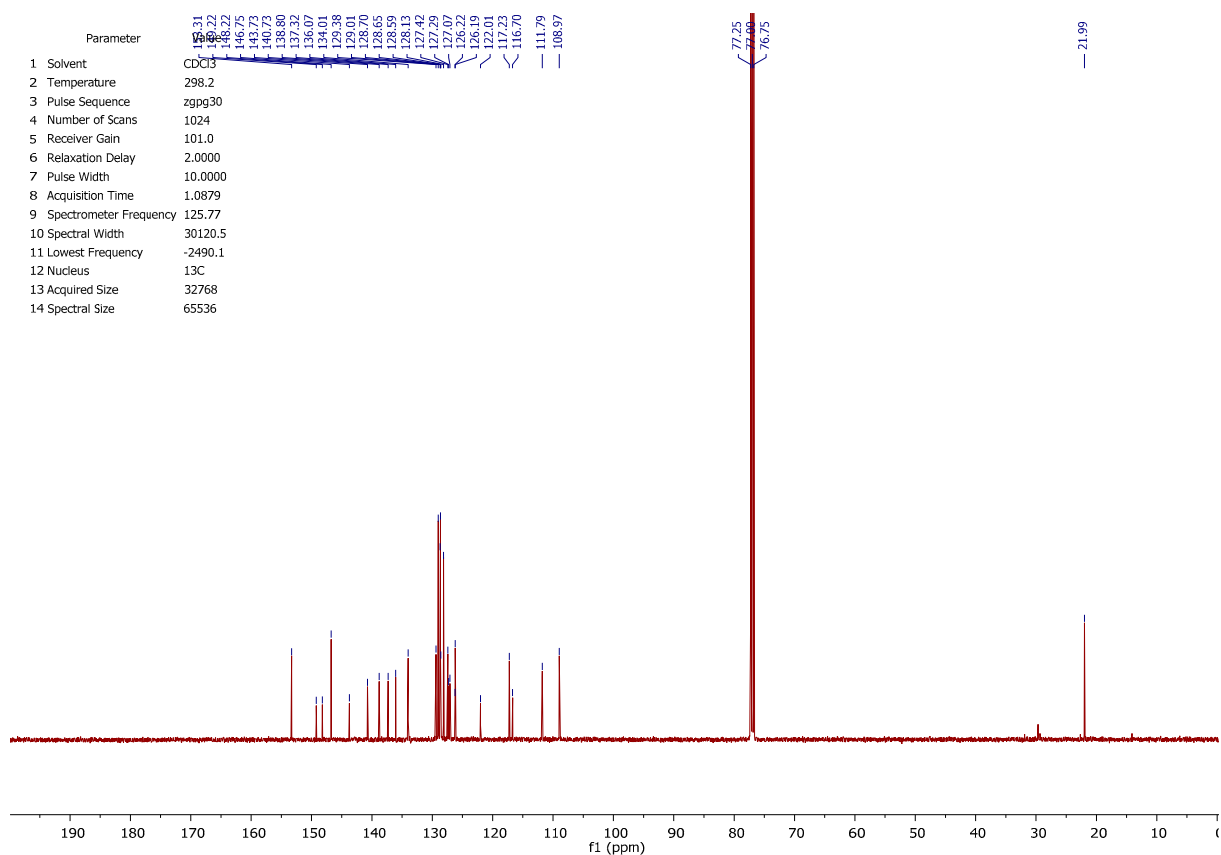

## 9-methyl-5,13-diphenylpyrimido[4,5',6':9,1]pyrrolo[2',1',5':4,5,6]quinolizino[3,2-b]quinoline (5h)

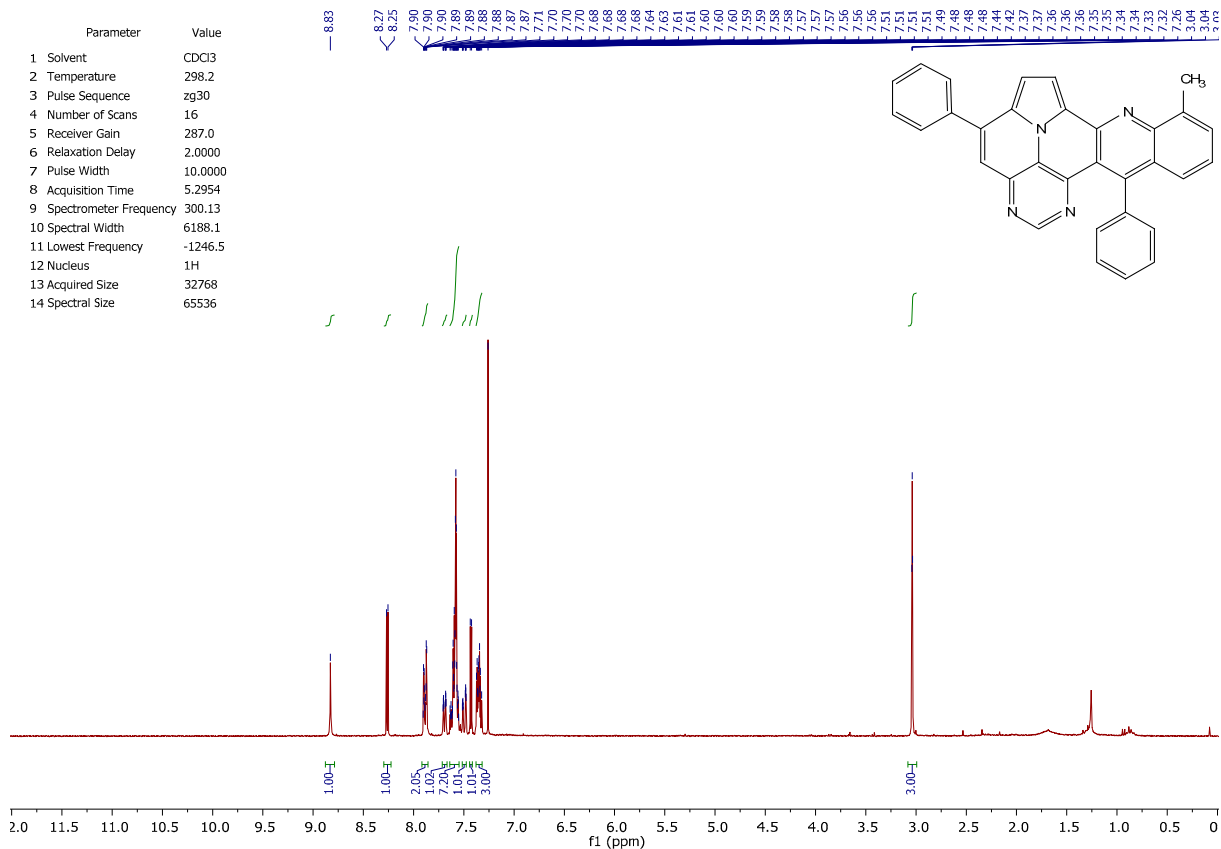



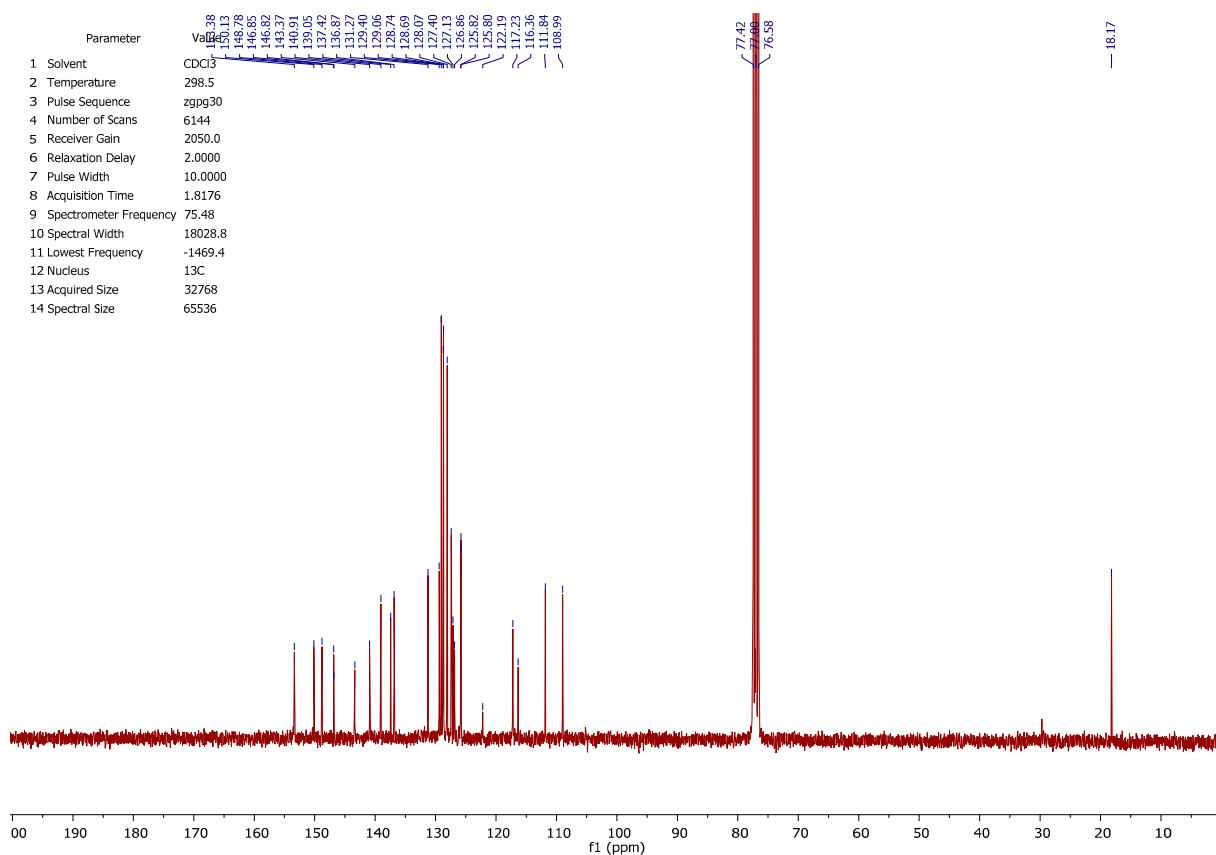

# 10,12-dimethyl-5,13-diphenylpyrimido[4',5',6':9,1]pyrrolo[2',1',5':4,5,6]quinolizino[3,2-b]quinoline (5i)

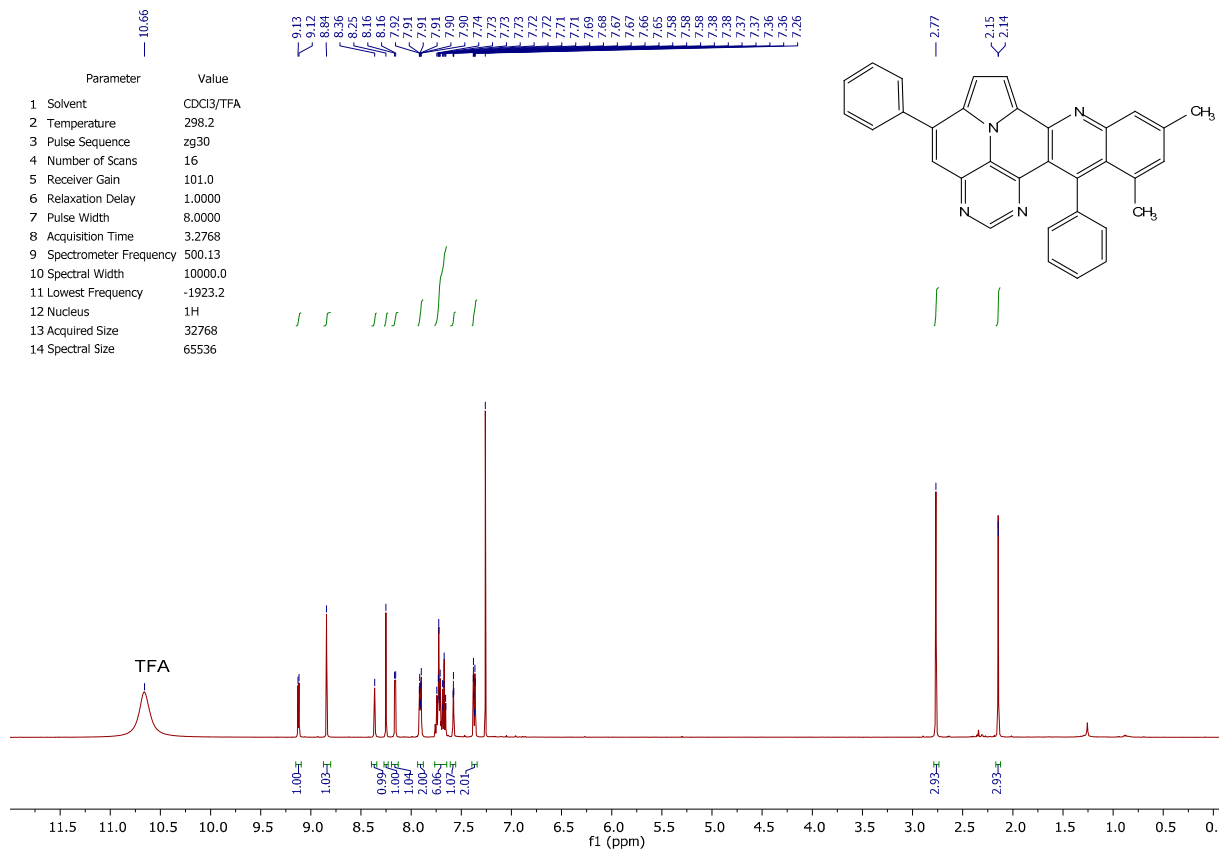

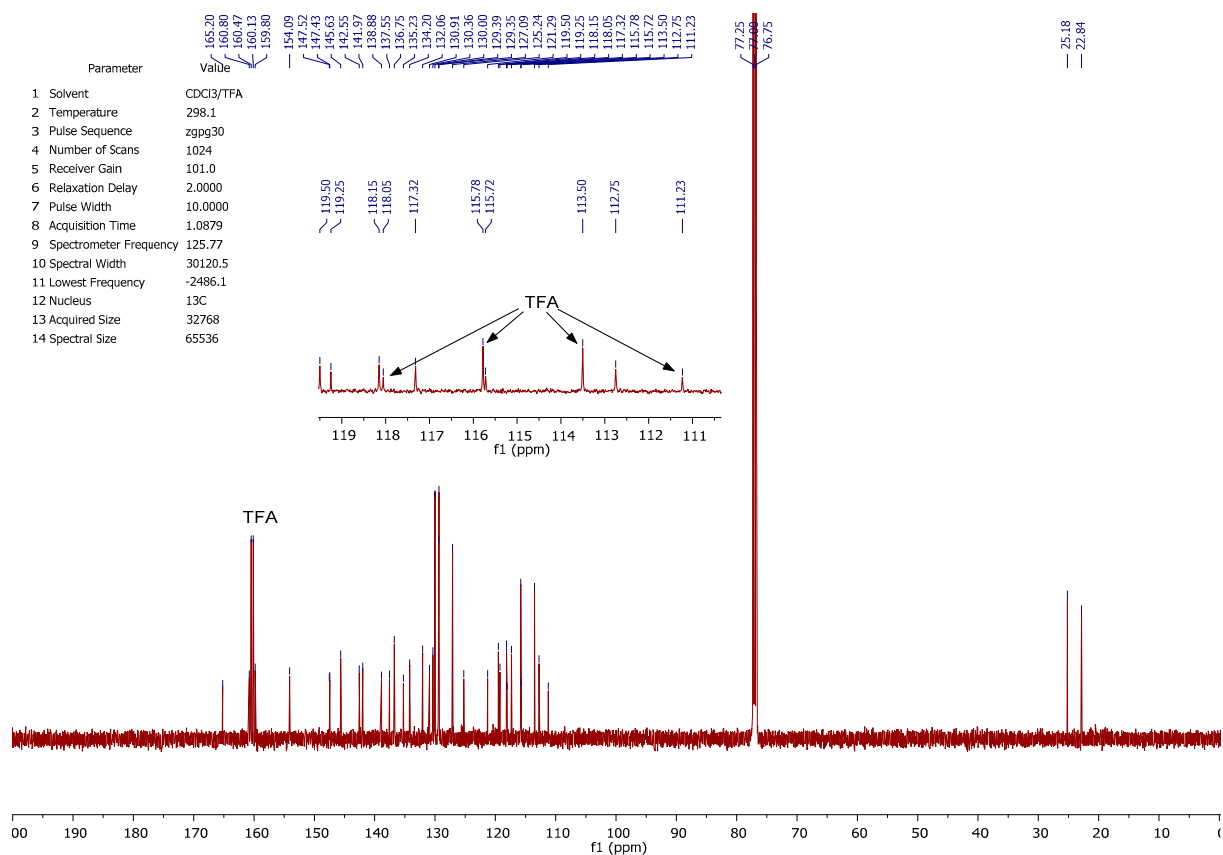

# 11-fluoro-5,13-diphenylpyrimido[4',5',6':9,1]pyrrolo[2',1',5':4,5,6]quinolizino[3,2-b]quinoline (5j)

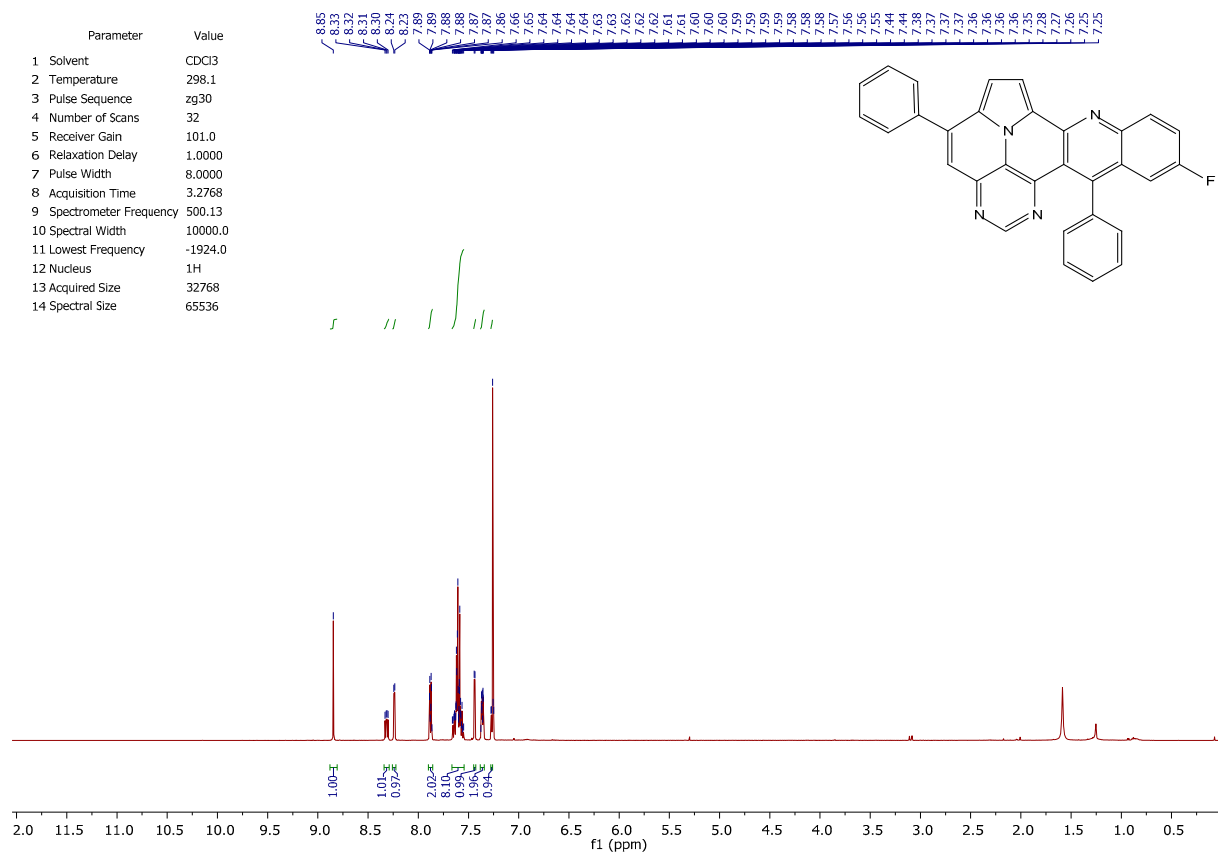

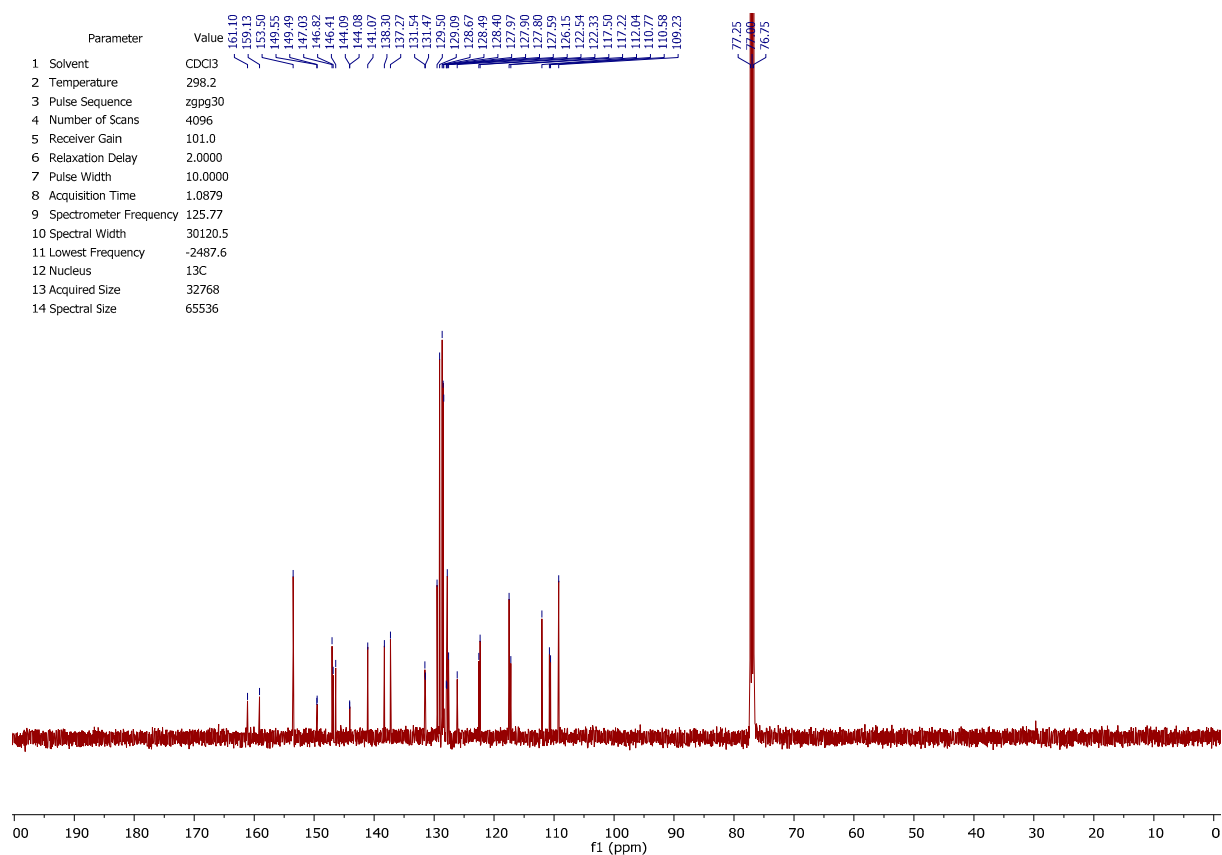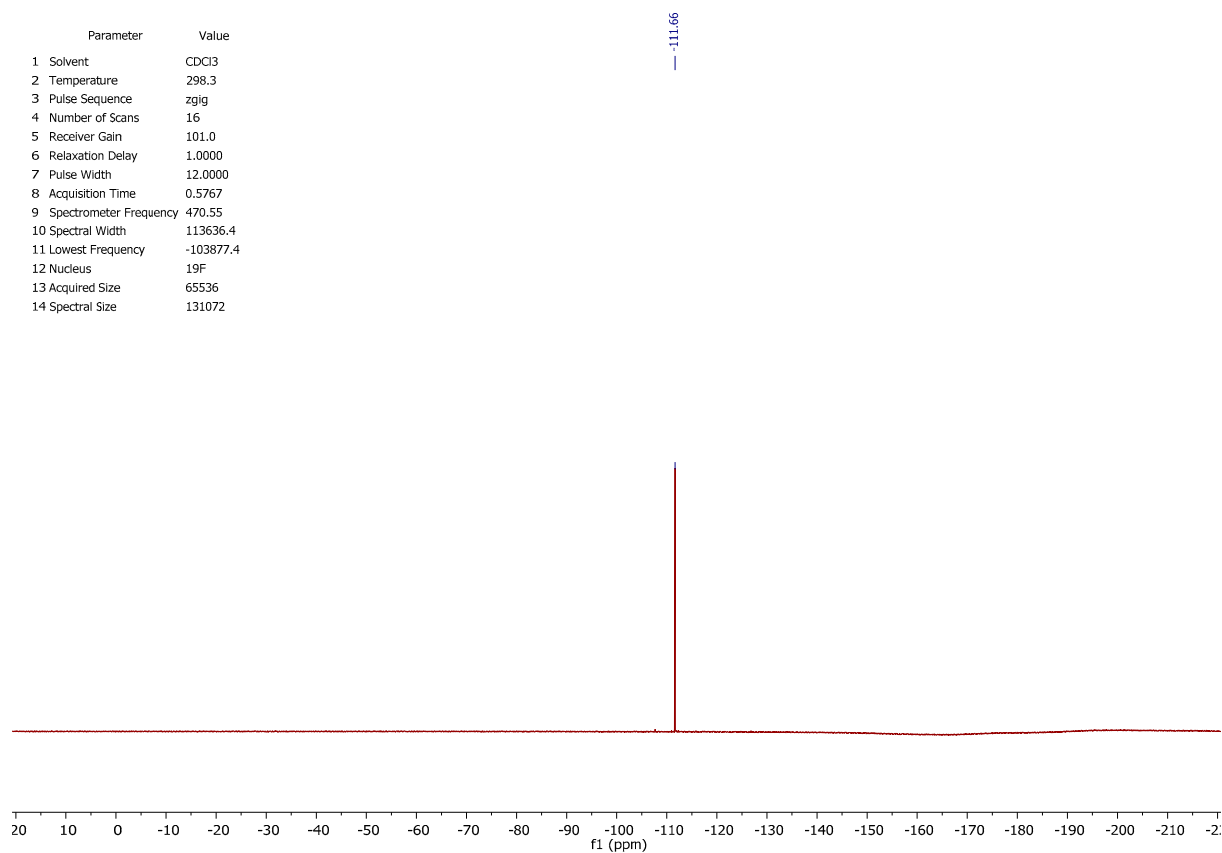

***N,N*-dimethyl-5,13-diphenylpyrimido[4',5',6':9,1]pyrrolo[2',1',5':4,5,6]quinolizino[3,2-*b*]quinolin-11-amine (5k)**

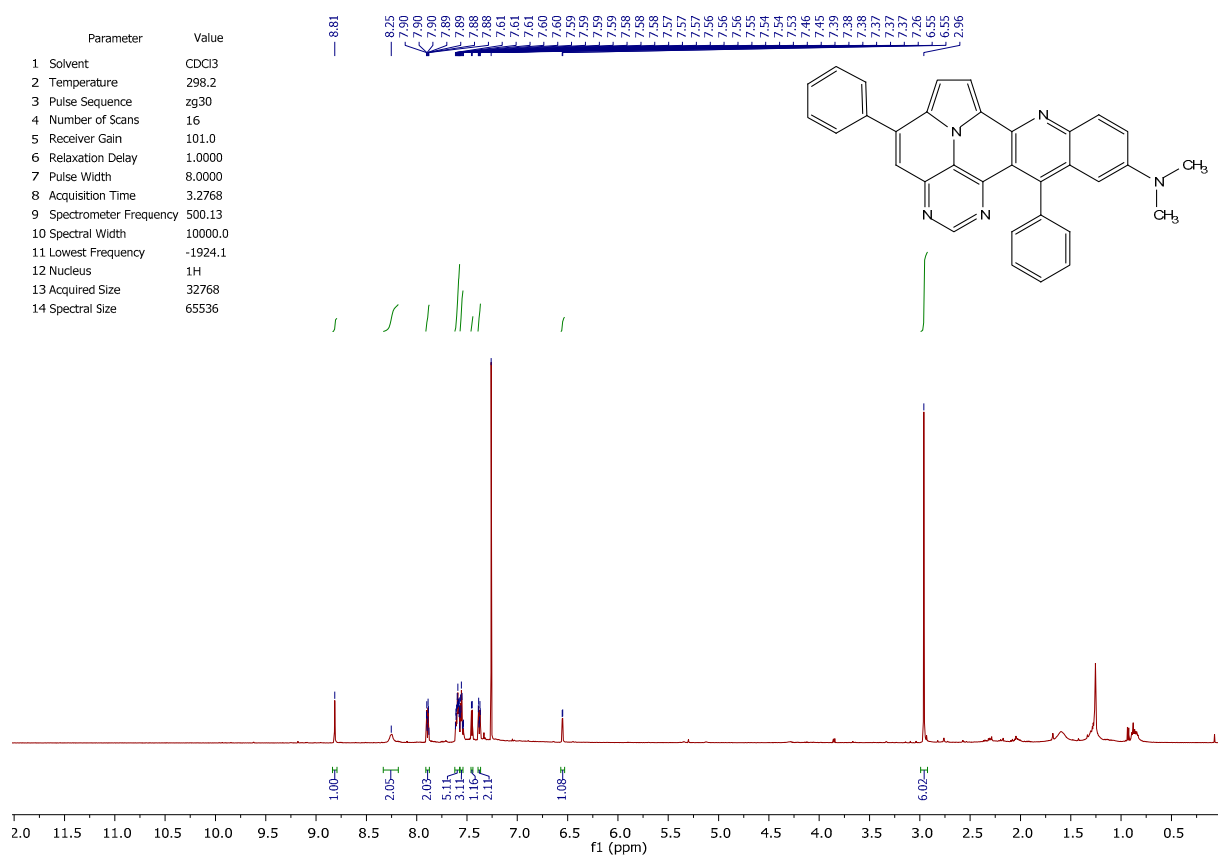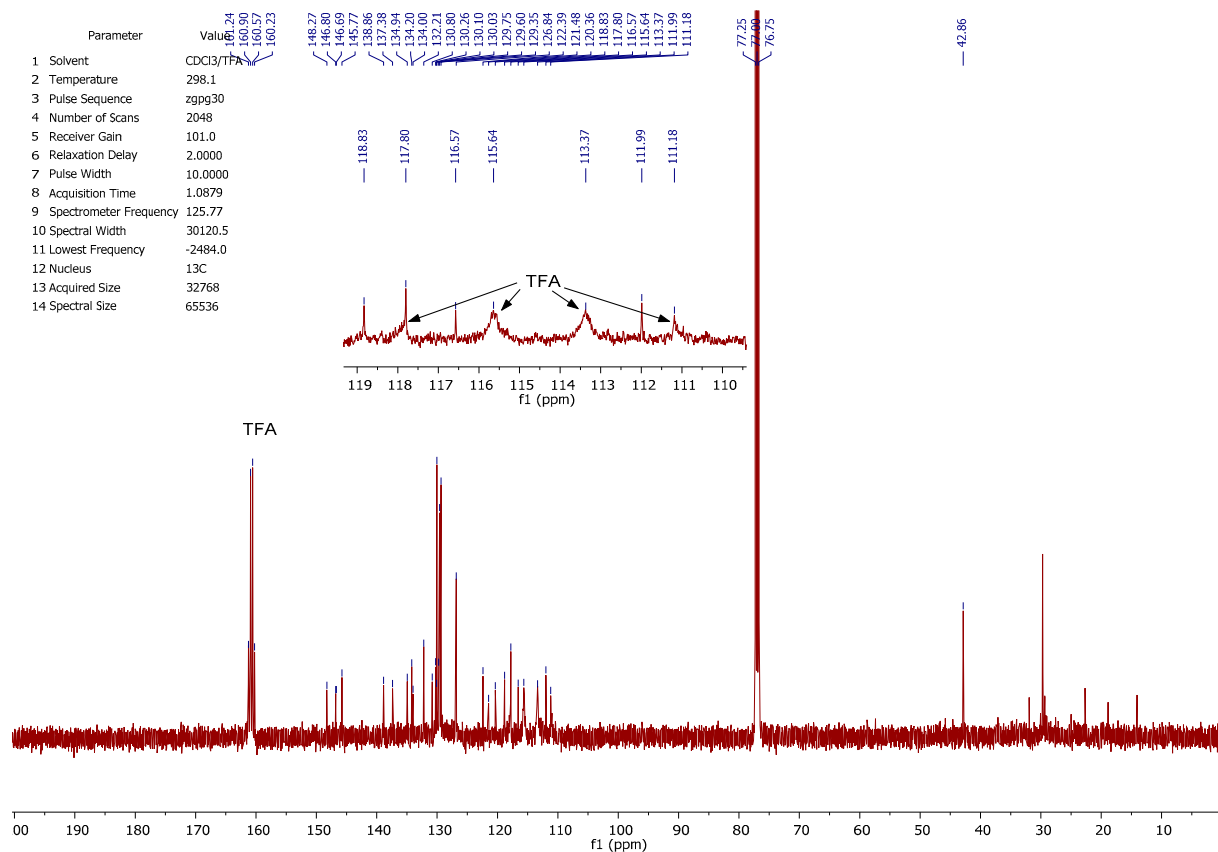

5,13-diphenyl-11-(trifluoromethyl)pyrimido[4,5,6':9,1]pyrrolo[2',1',5':4,5,6]quinolizino[3,2-b]quinoline (5l)

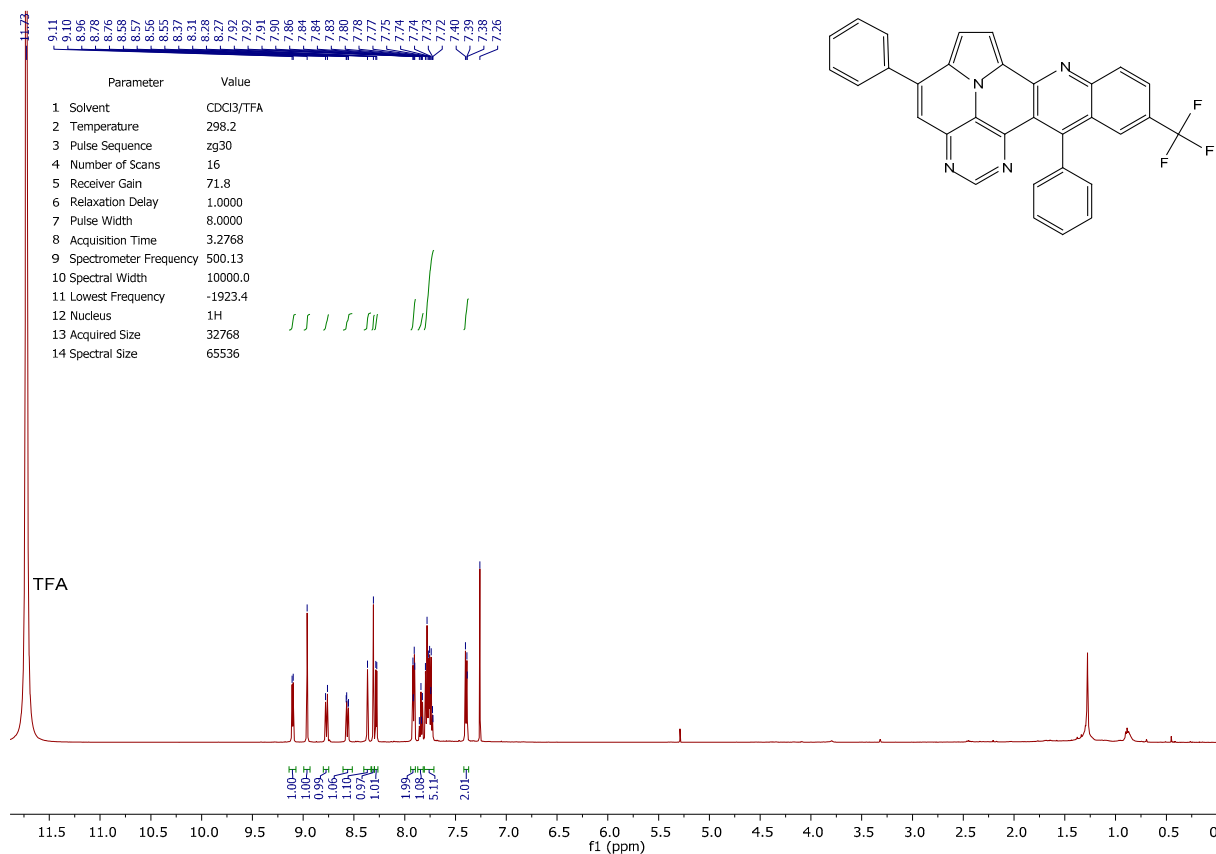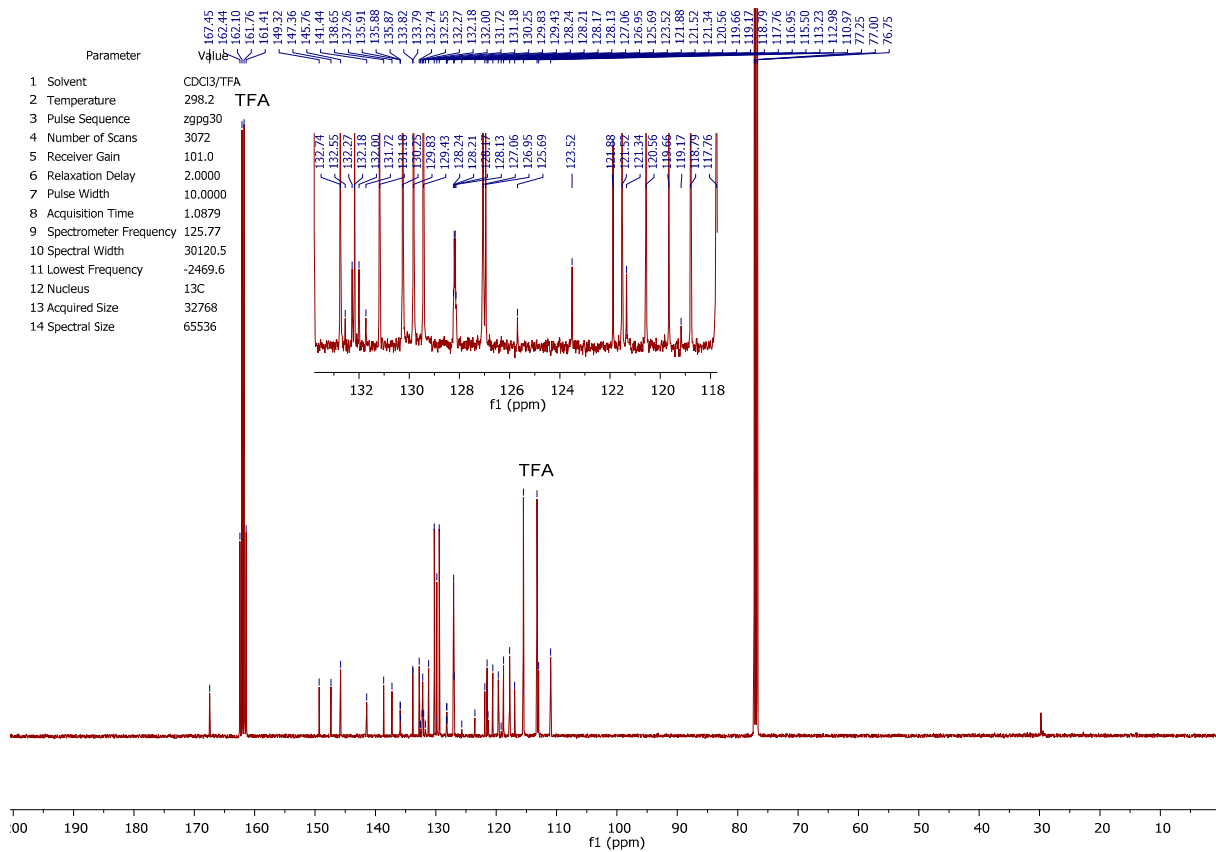

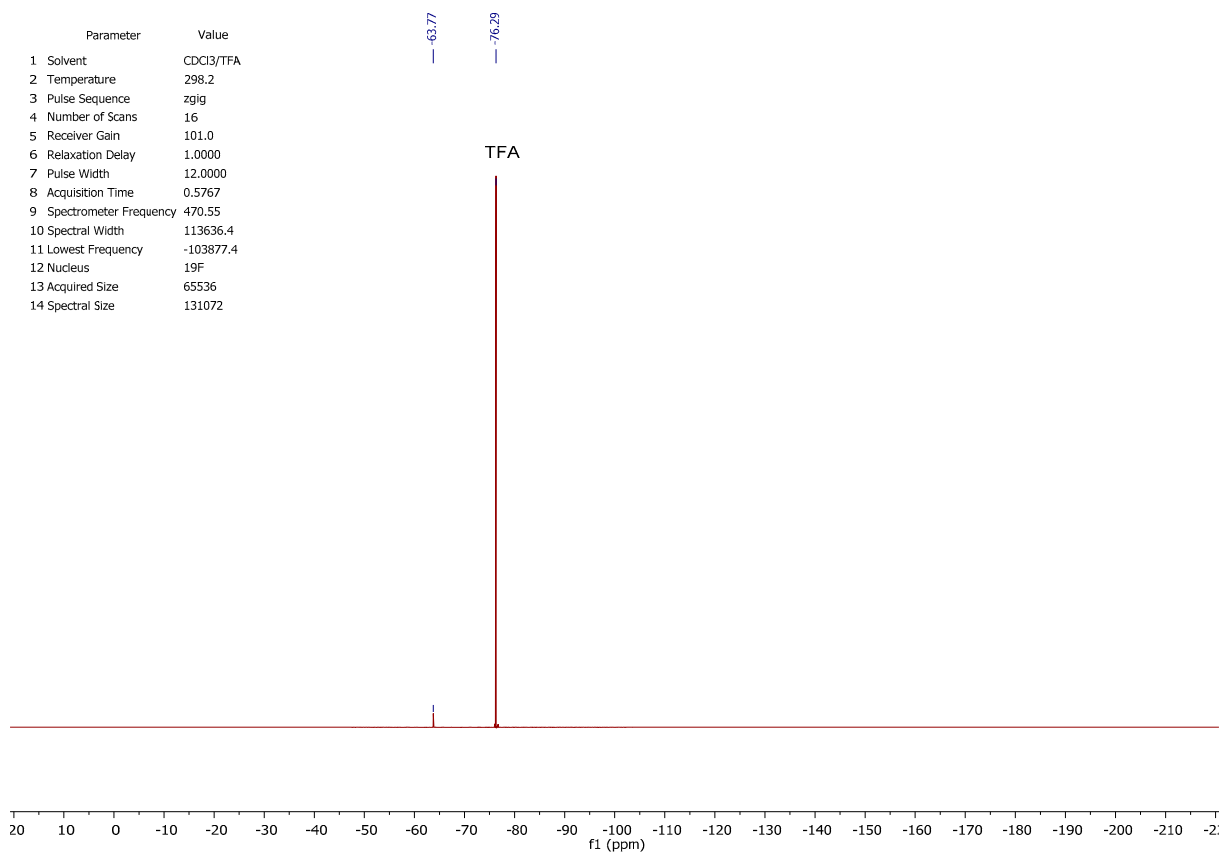

## phenyl(8-phenylpyrimido[4,5,6-*ij*]pyrrolo[2,1,5-*de*]quinolizin-4-yl)methanone (6a)

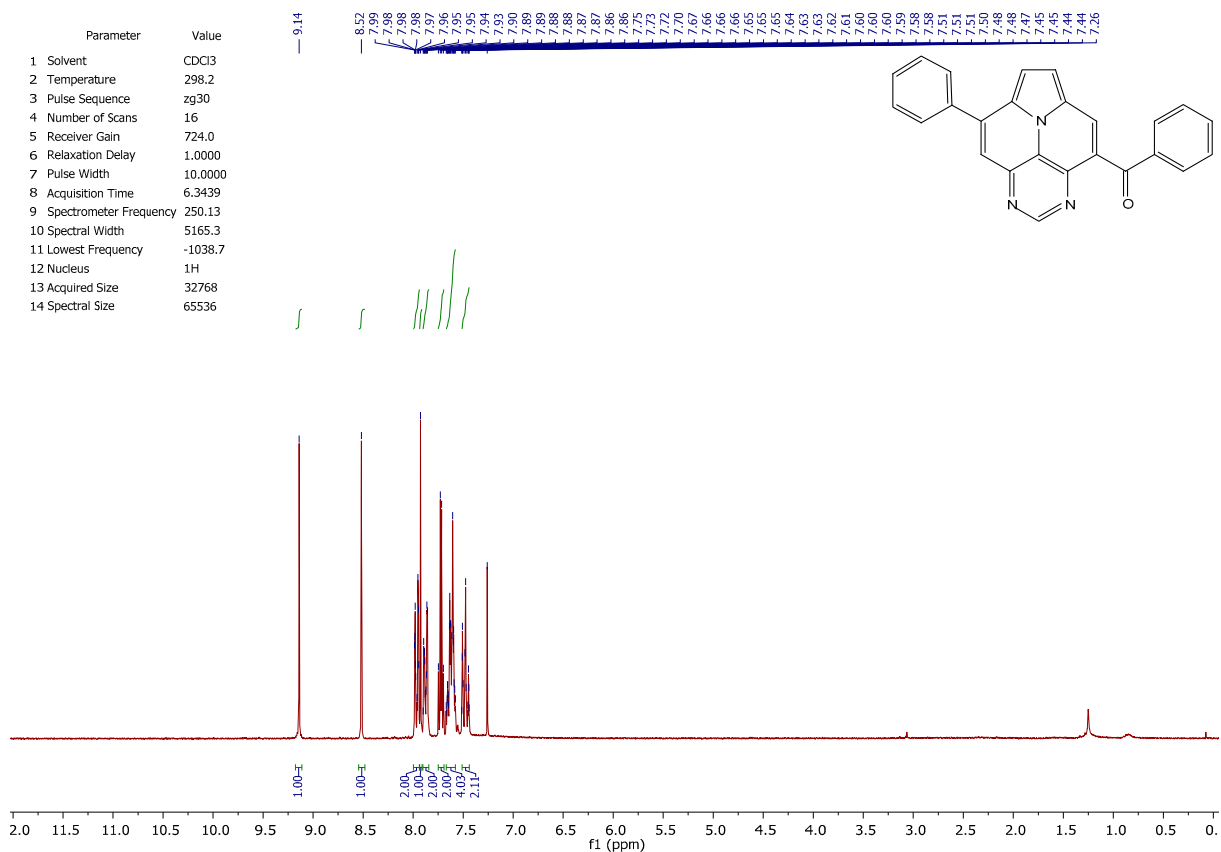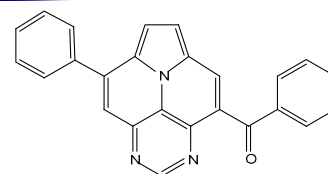

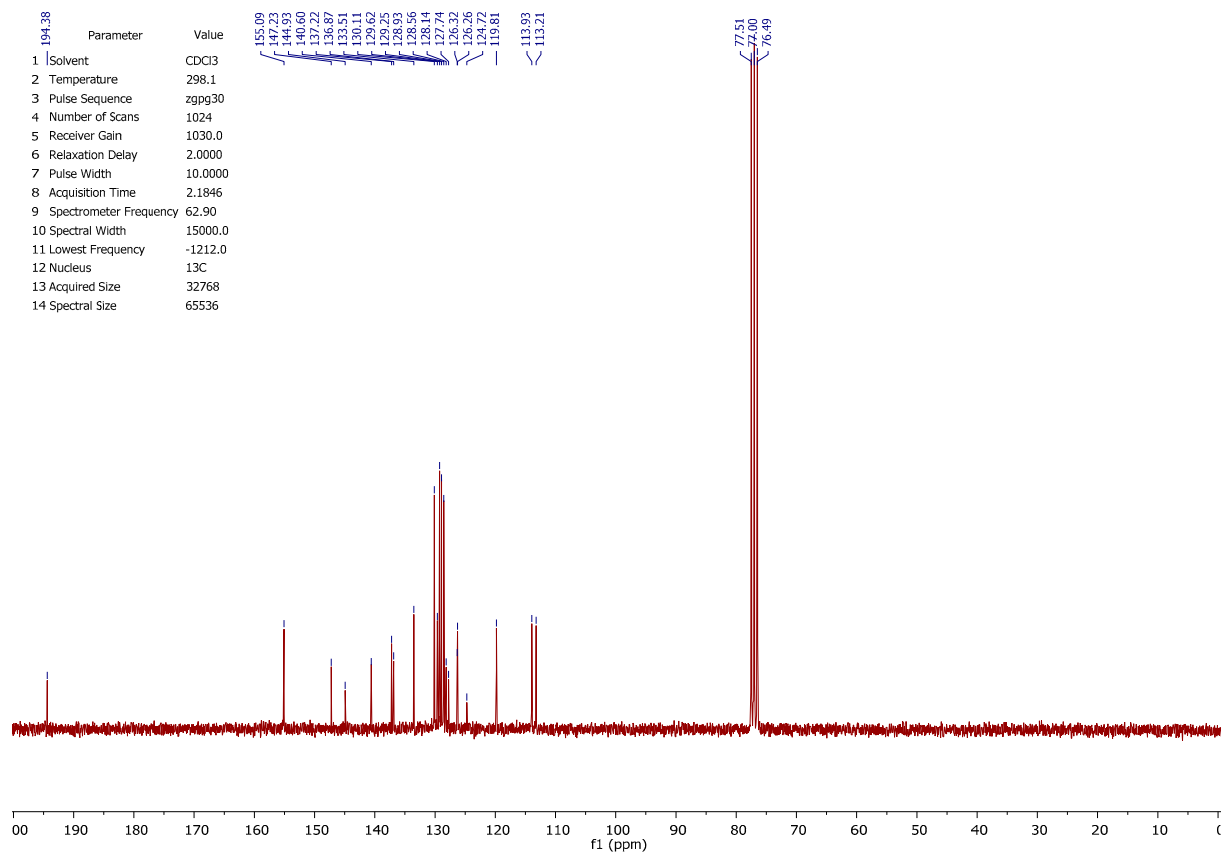

***p*-tolyl(8-(*p*-tolyl)pyrimido[4,5,6-*ij*]pyrrolo[2,1,5-*de*]quinolizin-4-yl)methanone (6b)**

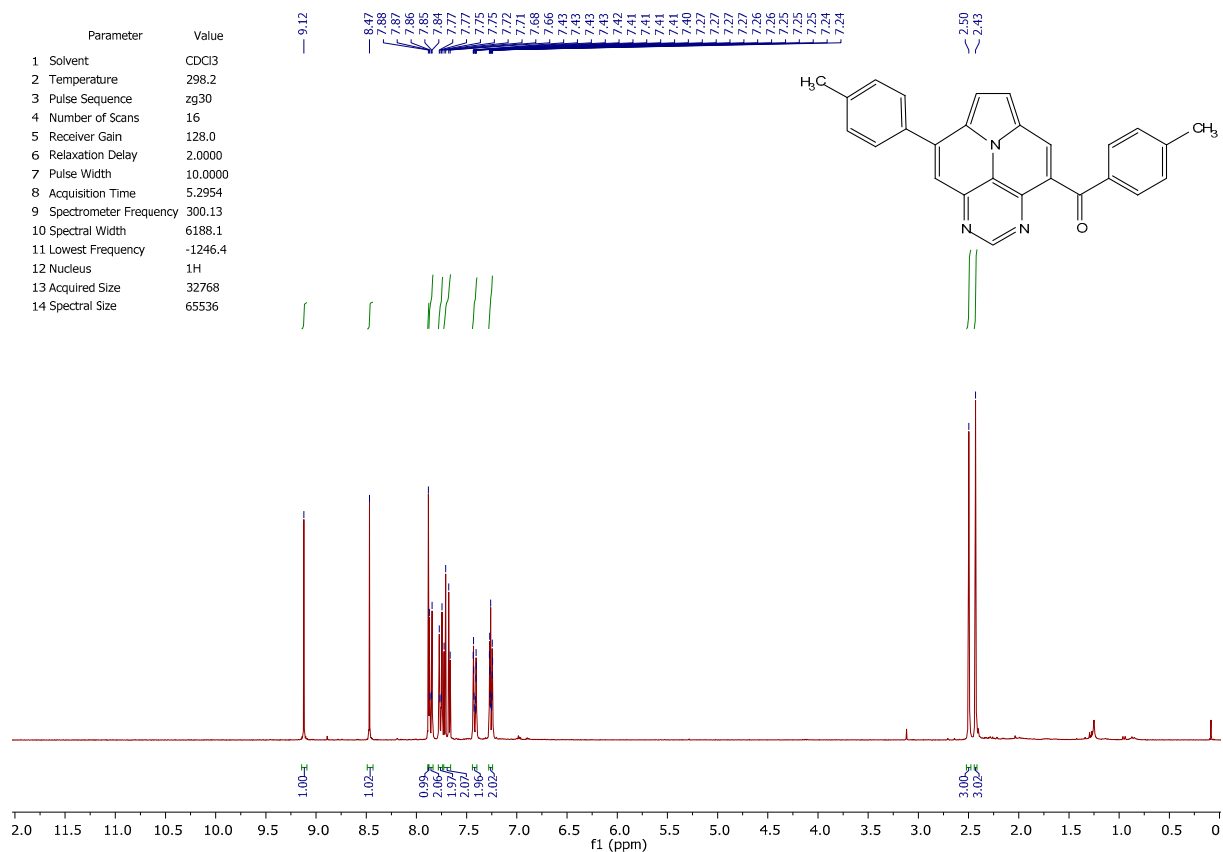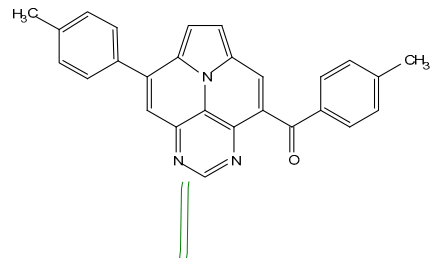

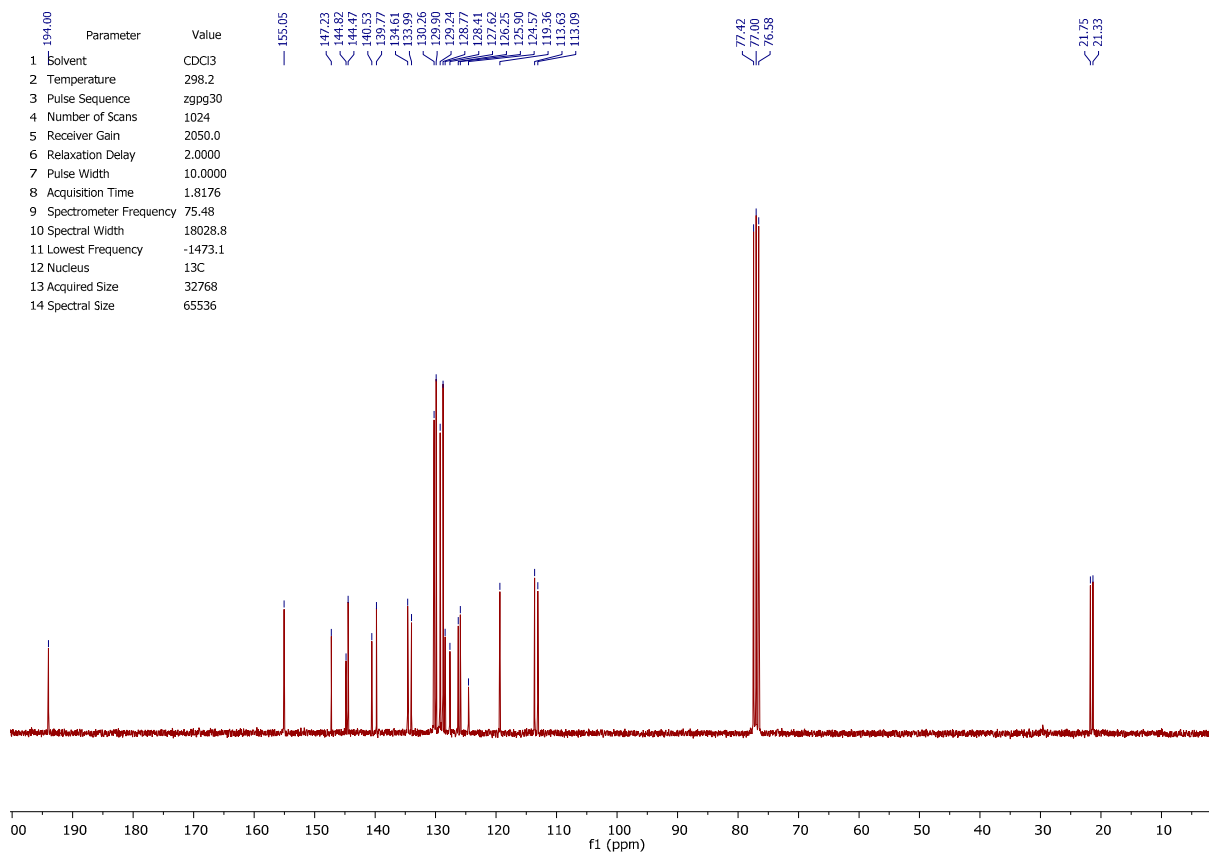

**(4-fluorophenyl)(8-(4-fluorophenyl)pyrimido[4,5-*b*]pyrrolo[2,1-*de*]quinolizin-4-yl)methanone (6c)**

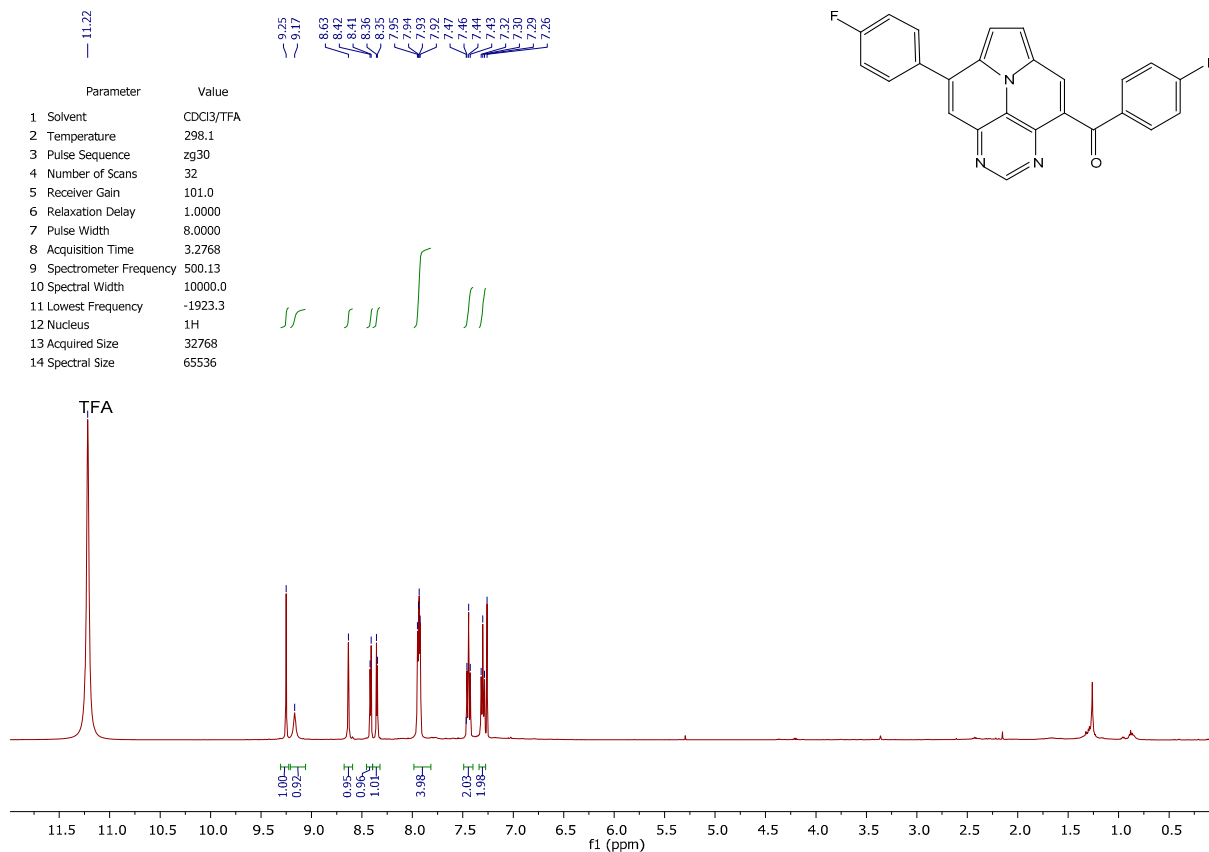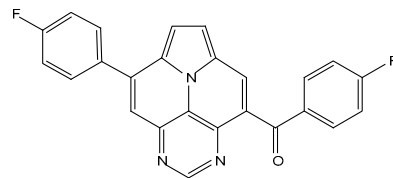



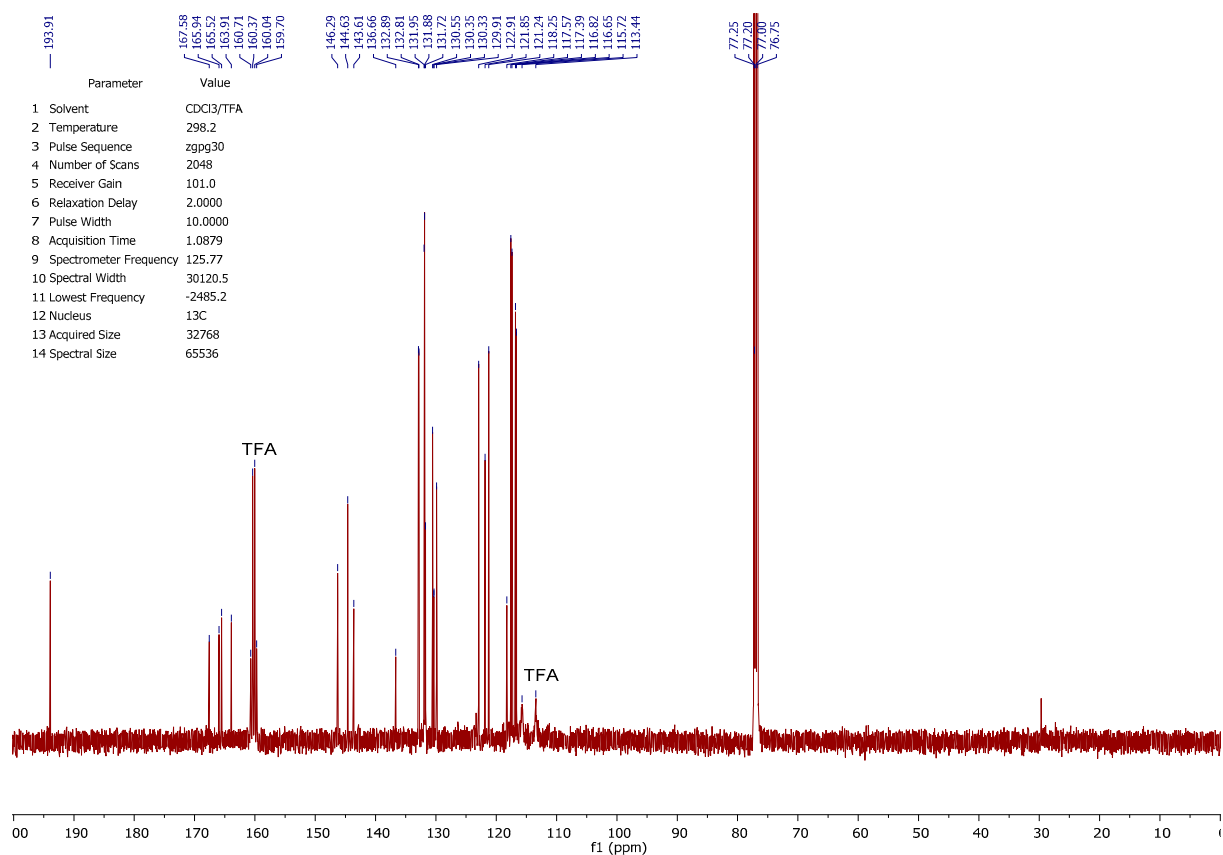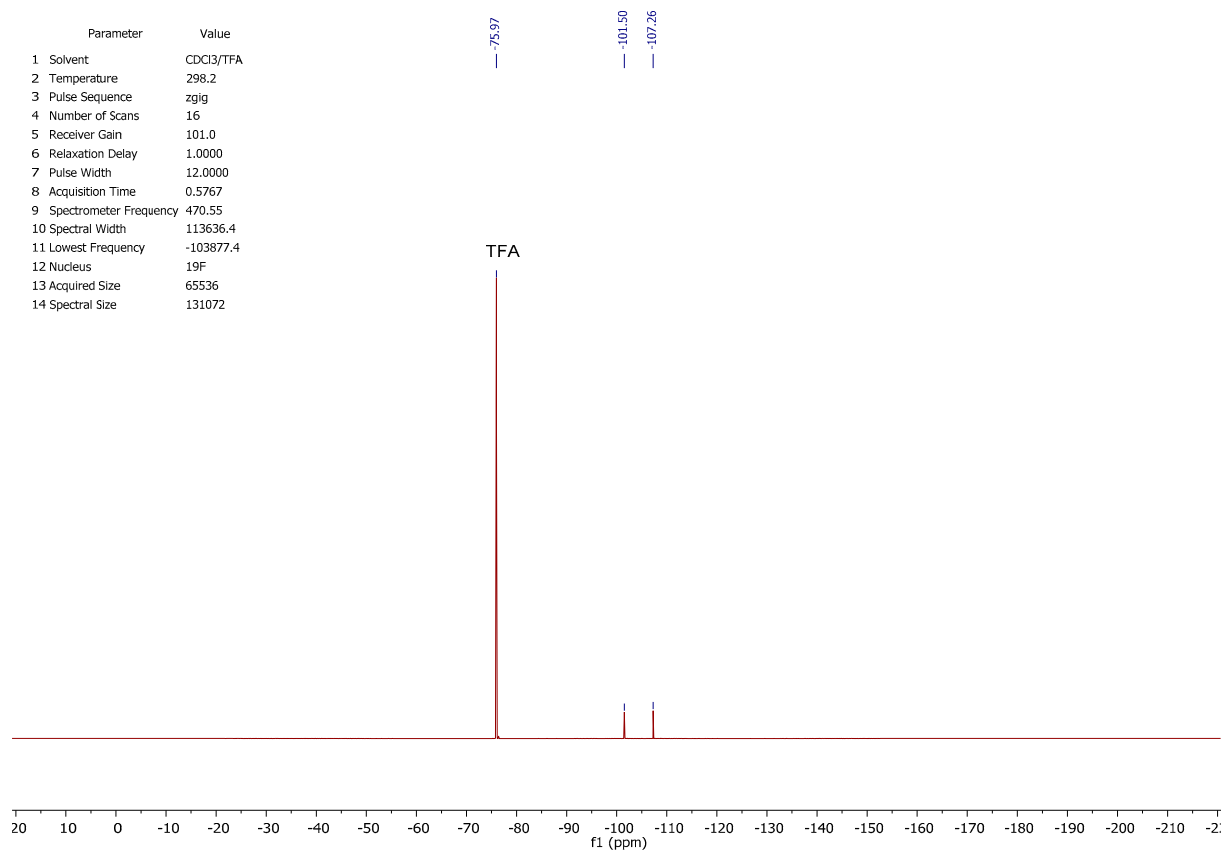

**(4-(dimethylamino)phenyl)(8-(4-(dimethylamino)phenyl)pyrimido[4,5,6-*ij*]pyrrolo[2,1,5-*de*]quinolizin-4-yl)methanone (6d)**

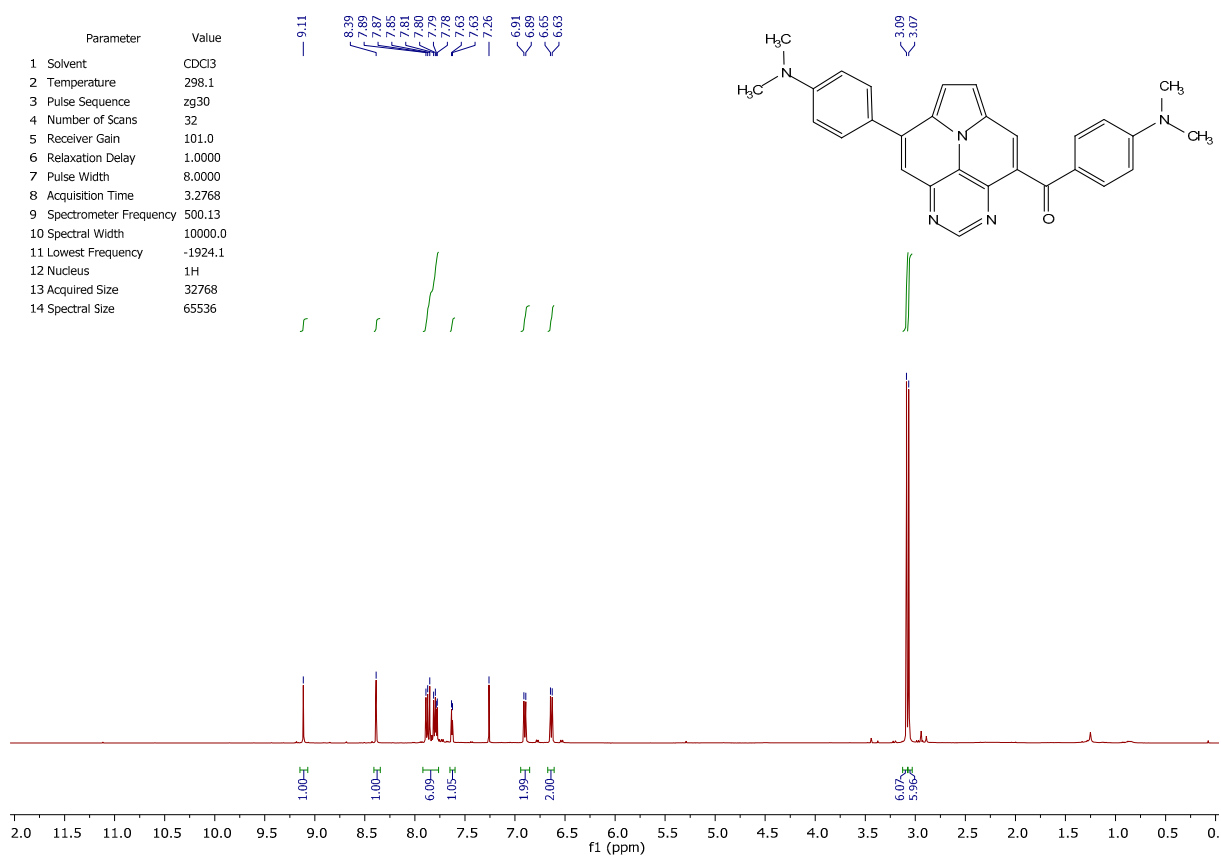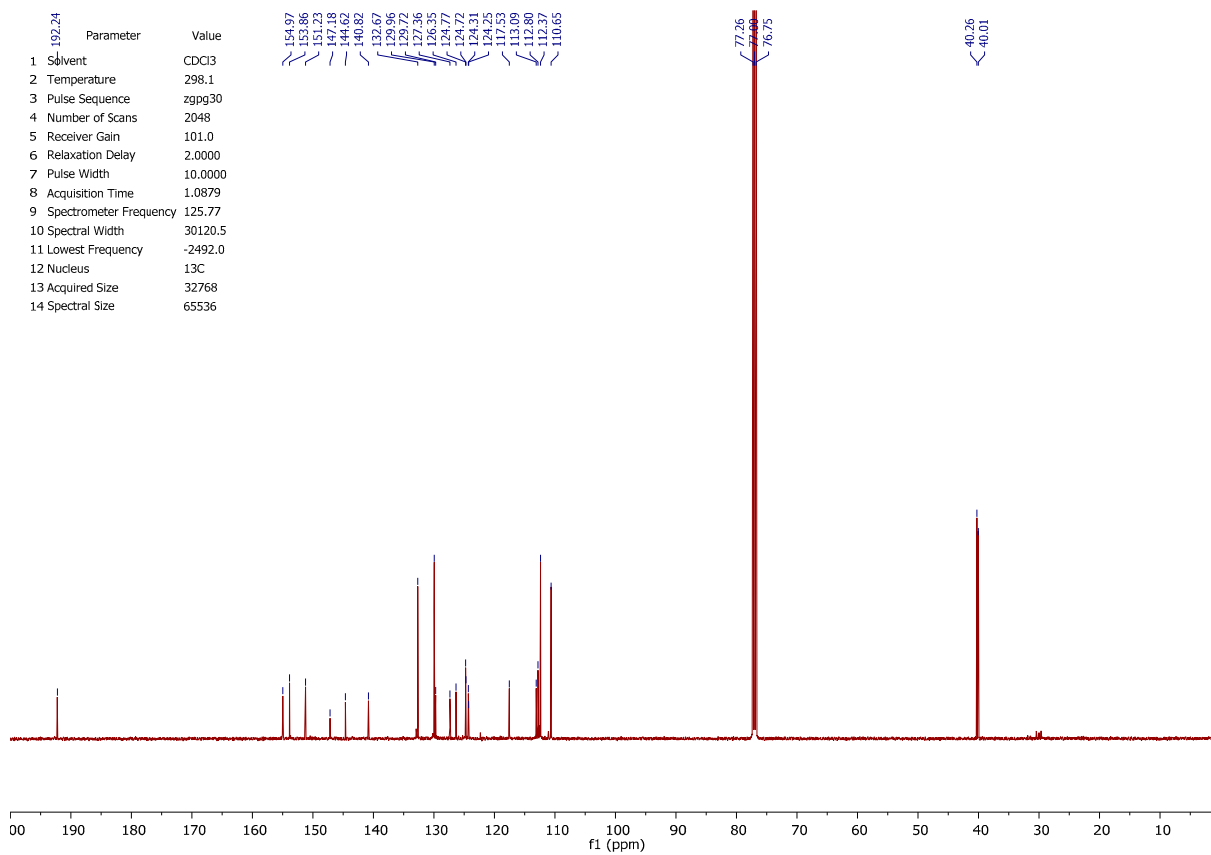

**(4-methoxyphenyl)(8-(4-methoxyphenyl)pyrimido[4,5,6-*ij*]pyrrolo[2,1,5-*de*]quinolin-4-yl)methanone (6e)**

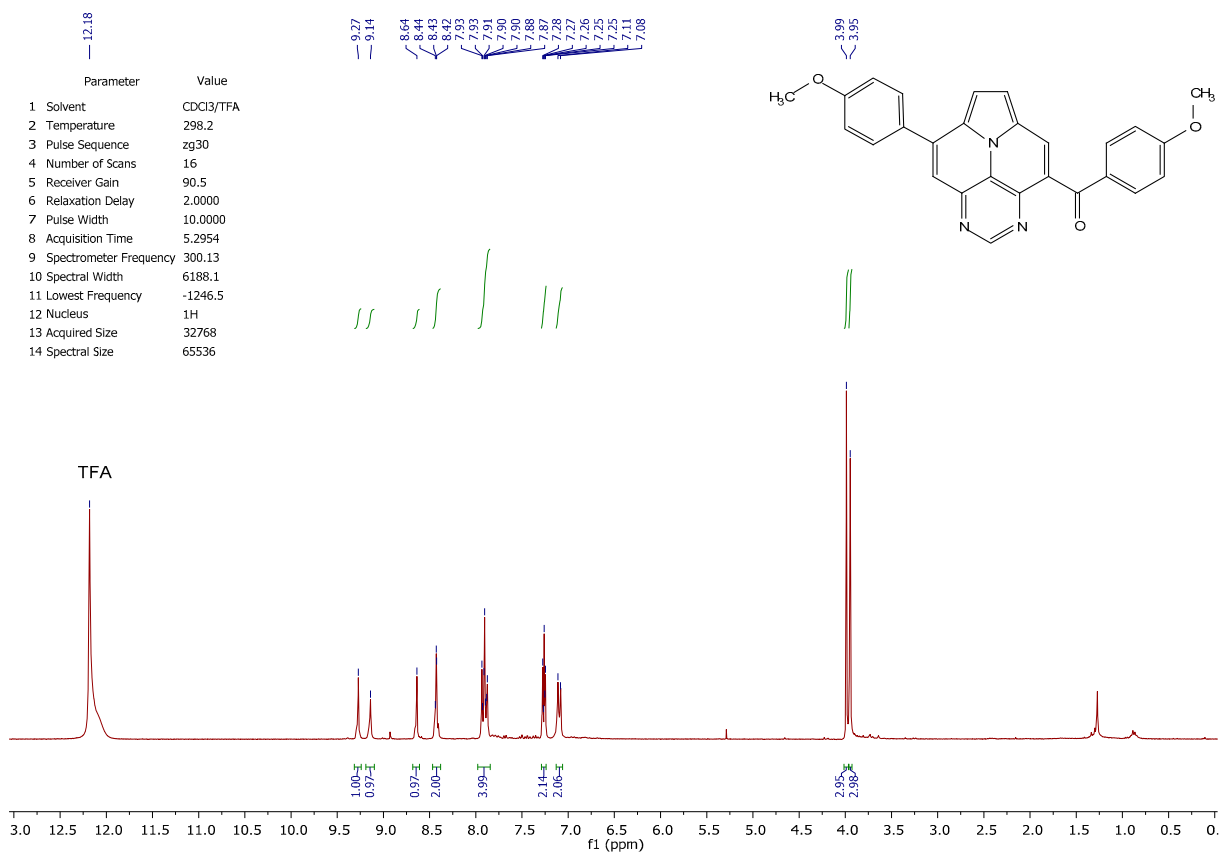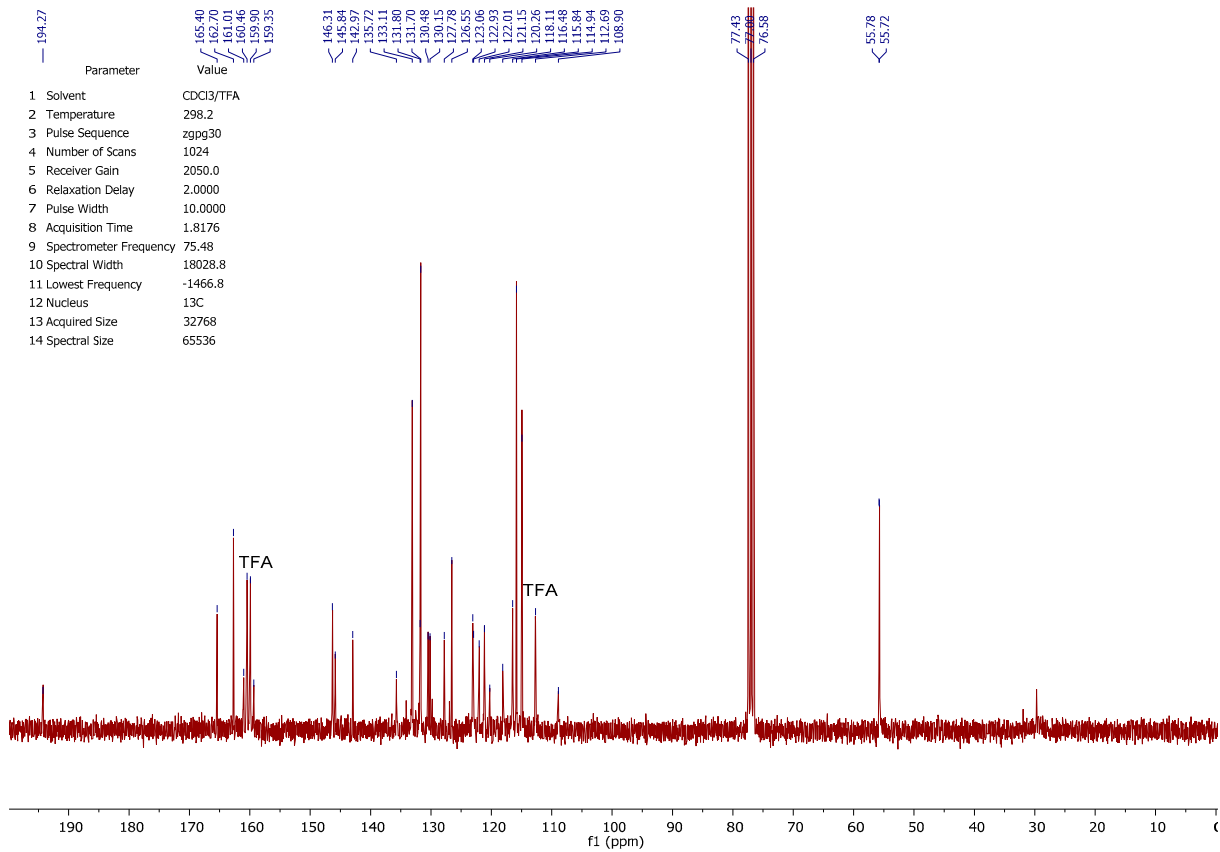

**(4-(trifluoromethyl)phenyl)(8-(4-(trifluoromethyl)phenyl)pyrimido[4,5,6-*ij*]pyrrolo[2,1,5-*de*]quinolizin-4-yl)methanone (6f)**

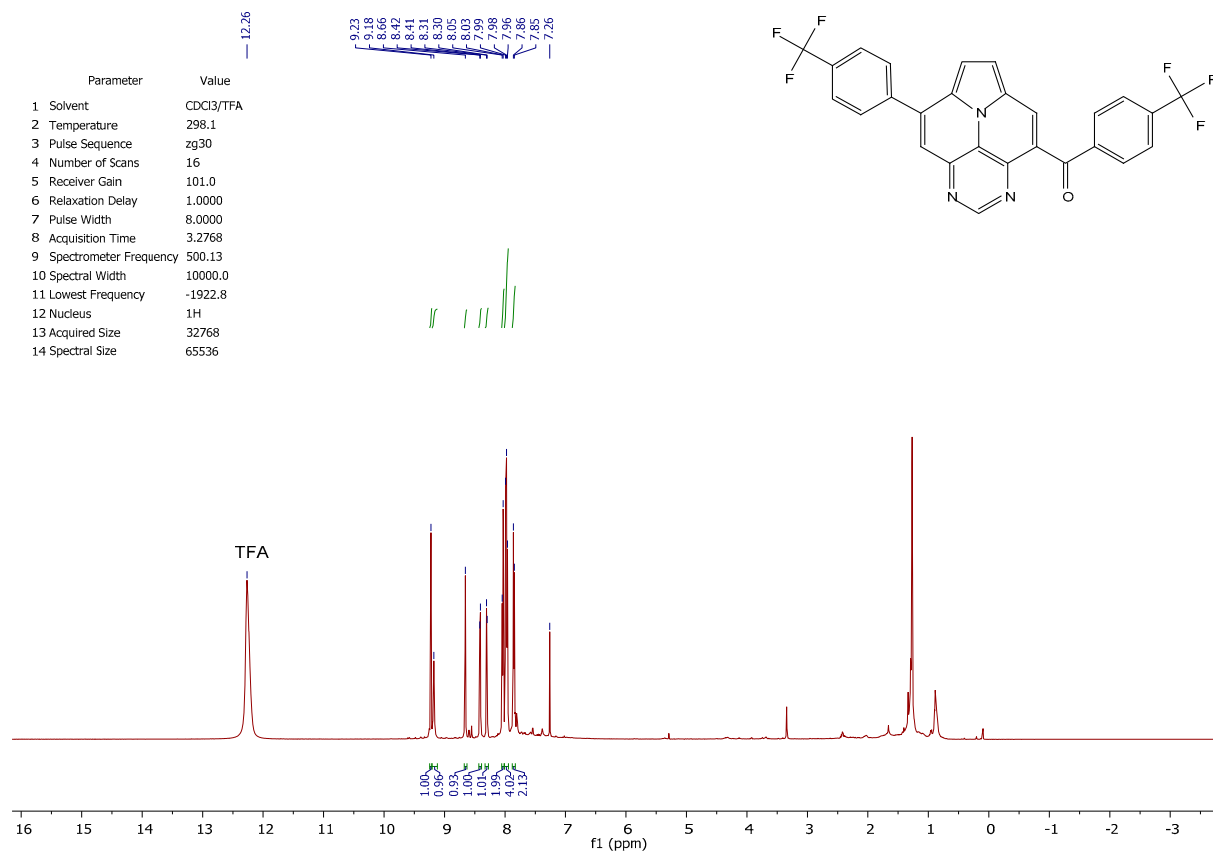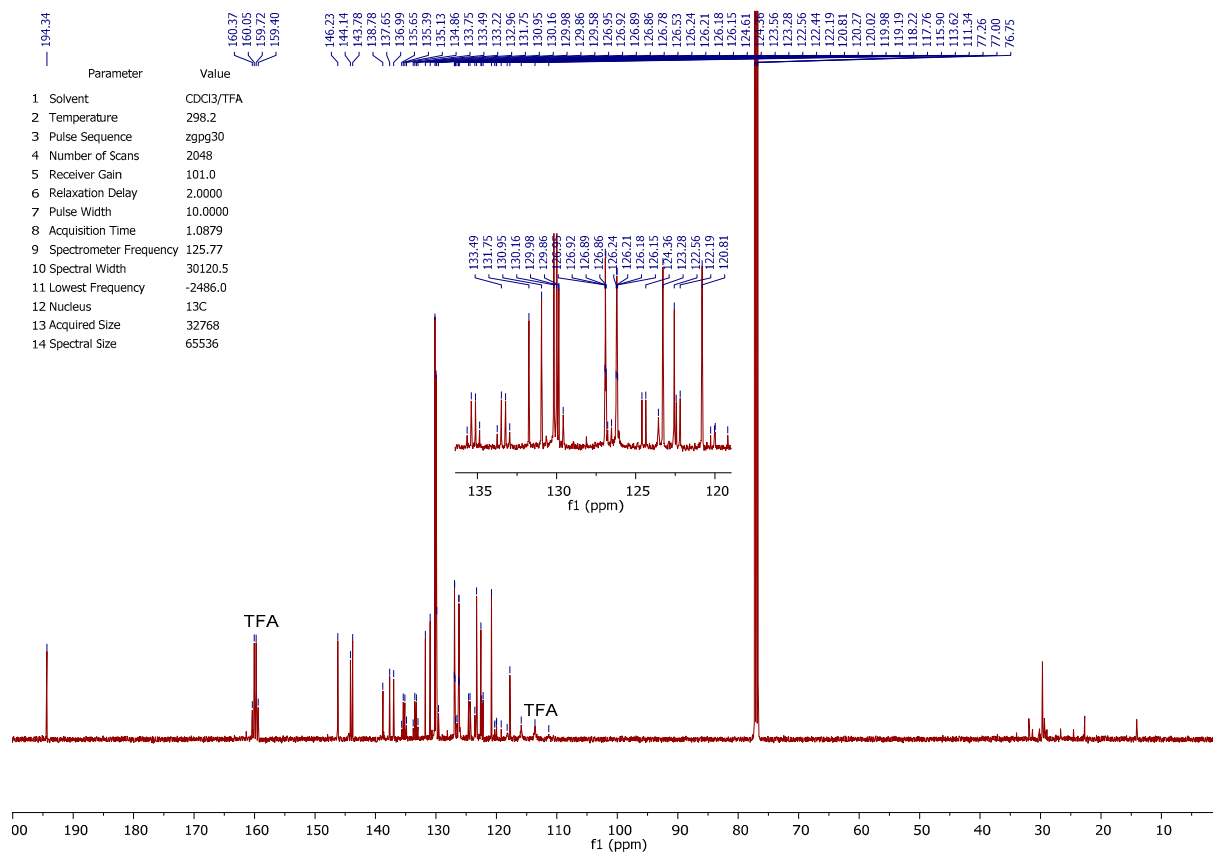

| Parameter                | Value                  |
|--------------------------|------------------------|
| 1 Solvent                | CDCl <sub>3</sub> /TFA |
| 2 Temperature            | 298.2                  |
| 3 Pulse Sequence         | zgig                   |
| 4 Number of Scans        | 16                     |
| 5 Receiver Gain          | 101.0                  |
| 6 Relaxation Delay       | 1.0000                 |
| 7 Pulse Width            | 12.0000                |
| 8 Acquisition Time       | 0.5767                 |
| 9 Spectrometer Frequency | 470.55                 |
| 10 Spectral Width        | 113636.4               |
| 11 Lowest Frequency      | -103877.4              |
| 12 Nucleus               | <sup>19</sup> F        |
| 13 Acquired Size         | 65536                  |
| 14 Spectral Size         | 131072                 |

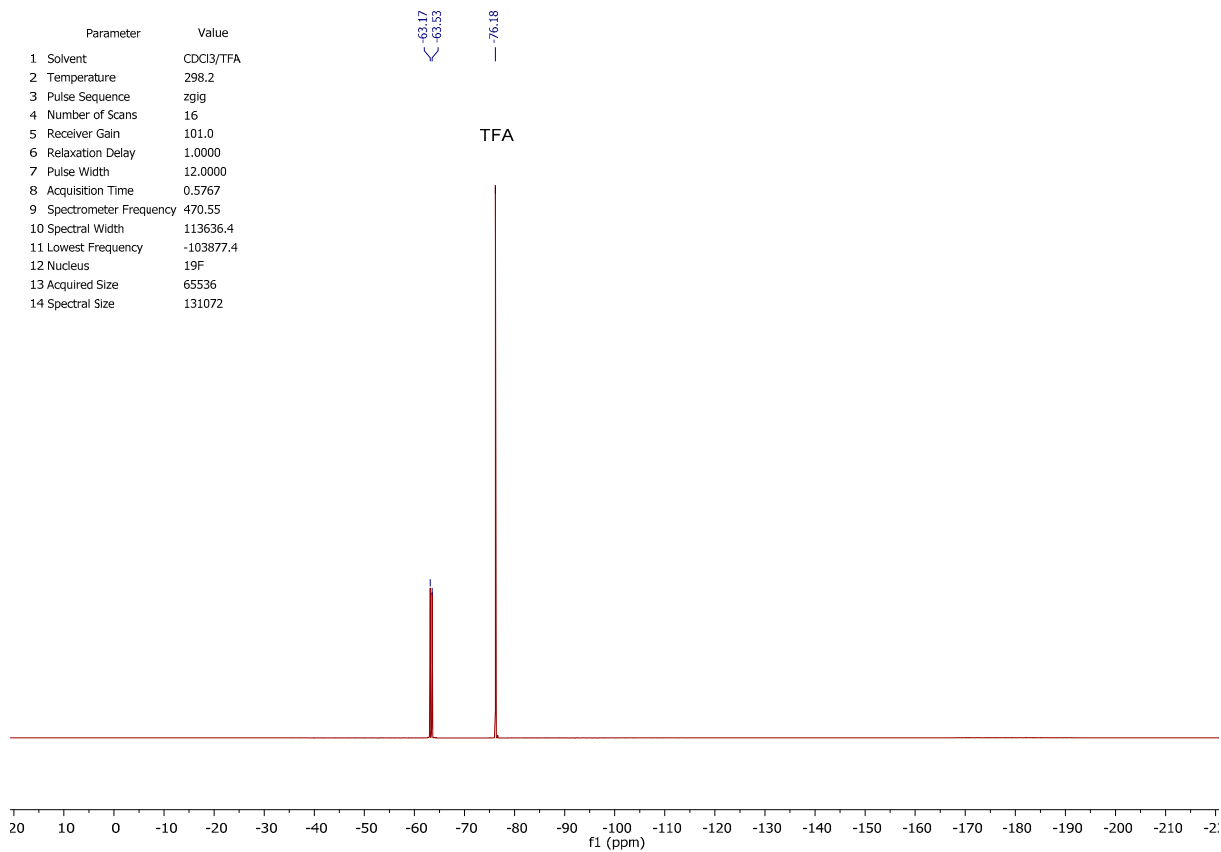

## REFERENCES

1. Xiang, J.; Zheng, L.; Chen, F.; Dang, Q.; Bai, X. A cascade reaction consisting of Pictet-Spengler-type cyclization and Smiles rearrangement: application to the synthesis of novel pyrrole-fused dihydropteridines. *Org. Lett.*, **2007**, 9, 765–767.
2. Brouwer, A.M. Standards for photoluminescence quantum yield measurements in solution (IUPAC Technical Report). *Pure Appl. Chem.*, **2011**, 83, 2213–2228.
3. Frisch, M.J.; Trucks, G.W.; Schlegel, H.B.; Scuseria, G.E.; Robb, M.A.; Cheeseman, J.R.; Scalmani, G.; Barone, V.; Petersson, G.A.; Nakatsuji, H.; Li, X.; Caricato, M.; Marenich, A.V.; Bloino, J.; Janesko, B.G.; Gomperts, R.; Mennucci, B.; Hratchian, H.P.; Ortiz, J.V.; Izmaylov, A.F.; Sonnenberg, J.L.; Williams, Ding, F.; Lipparini, F.; Egidi, F.; Goings, J.; Peng, B.; Petrone, A.; Henderson, T.; Ranasinghe, D.; Zakrzewski, V.G.; Gao, J.; Rega, N.; Zheng, G.; Liang, W.; Hada, M.; Ehara, M.; Toyota, K.; Fukuda, R.; Hasegawa, J.; Ishida, M.; Nakajima, T.; Honda, Y.; Kitao, O.; Nakai, H.; Vreven, T.; Throssell, K.; Montgomery Jr., J.A.; Peralta, J.E.; Ogliaro, F.; Bearpark, M.J.; Heyd, J.J.; Brothers, E.N.; Kudin, K.N.; Staroverov, V.N.; Keith, T.A.; Kobayashi, R.; Normand, J.; Raghavachari, K.; Rendell, A.P.; Burant, J.C.; Iyengar, S.S.; Tomasi, J.; Cossi, M.; Millam, J.M.; Klene, M.; Adamo, C.; Cammi, R.; Ochterski, J.W.; Martin, R.L.; Morokuma, K.; Farkas, O.; Foresman, J.B.; Fox, D.J. *Gaussian 16 Rev. C.01*: Wallingford, CT, **2016**.
4. Paenurk, E.; Gershoni-Poranne, R. Simple and efficient visualization of aromaticity: bond currents calculated from NICS values. *Phys. Chem. Chem. Phys.*, **2022**, 24, 8631–8644.
